# Supplementary material for: Association between surgical admissions, cognition, and neurodegeneration in older people: a population-based study from the UK Biobank
Source: PubMed Central journal article supplement — Lancet Healthy Longev. Author manuscript; Available in PMC 2024 Oct 8. (PMC11460833; doi:10.1016/j.lanhl.2024.07.006), 2024-09-05
Supplement: NIHMS2024566-supplement-1.pdf [file NIHMS2024566-supplement-1.pdf]

# THE LANCET

## Healthy Longevity

### **Supplementary appendix**

This appendix formed part of the original submission and has been peer reviewed.  
We post it as supplied by the authors.

Supplement to: Taylor J, Robledo KP, Medel V, et al. Association between surgical admissions, cognition, and neurodegeneration in older people: a population-based study from the UK Biobank. *Lancet Healthy Longev* 2024. <https://doi.org/10.1016/j.lanhl.2024.07.006>

# Association between surgical admissions, cognition, and neurodegeneration in older people: UK Biobank population-based study - Supplementary Material

## Table of Contents

|                                                                                                                                                                            |          |
|----------------------------------------------------------------------------------------------------------------------------------------------------------------------------|----------|
| <b>ASSOCIATION BETWEEN SURGICAL ADMISSIONS, COGNITION, AND<br/>NEURODEGENERATION IN OLDER PEOPLE: UK BIOBANK POPULATION-BASED STUDY -<br/>SUPPLEMENTARY MATERIAL</b> ..... | <b>1</b> |
| SUPPLEMENTARY METHODS .....                                                                                                                                                | 2        |
| COGNITIVE OUTCOMES .....                                                                                                                                                   | 5        |
| <i>Brain imaging outcomes</i> .....                                                                                                                                        | 5        |
| <i>Primary exposure and risk factors</i> .....                                                                                                                             | 6        |
| <i>Table 2. Model selection</i> .....                                                                                                                                      | 10       |
| <i>Table 3. Expanded demographics table by cognitive outcomes</i> .....                                                                                                    | 11       |
| <i>Table 4. 1·0 participants returning at 1·2</i> .....                                                                                                                    | 15       |
| FOUNDATION MODELS. COGNITIVE OUTCOMES ~ SURGERIES VARIABLES .....                                                                                                          | 17       |
| <i>Table 5. Foundation models cognitive outcomes ~ cumulative surgeries</i> .....                                                                                          | 17       |
| <i>Table 6. Foundation models cognitive outcomes ~ surgery factored</i> .....                                                                                              | 18       |
| <i>Table 7. Foundation models cognitive outcome ~ high complexity surgeries</i> .....                                                                                      | 19       |
| FULLY ADJUSTED MODELS. COGNITIVE OUTCOMES ~ SURGERIES VARIABLES .....                                                                                                      | 20       |
| <i>Table 8. Fully adjusted models cognitive outcome ~ cumulative surgeries</i> .....                                                                                       | 20       |
| FOUNDATION MODELS. COGNITIVE OUTCOMES ~ BRAIN IMAGING VARIABLES .....                                                                                                      | 23       |
| <i>Table 9. Foundation models cognitive outcomes ~ volume of white matter hyperintensities</i> .....                                                                       | 23       |
| <i>Table 10. Foundation models cognitive outcomes ~ volume of average hippocampus</i> .....                                                                                | 24       |
| FULLY ADJUSTED MODELS. COGNITIVE OUTCOMES ~ BRAIN IMAGING PRIMARY OUTCOMES .....                                                                                           | 25       |
| <i>Table 11. Fully adjusted models. cognitive outcomes ~ white matter hyperintensities</i> .....                                                                           | 25       |
| <i>Table 12. Fully adjusted models cognitive outcomes ~ average volume of hippocampus</i> .....                                                                            | 28       |
| FOUNDATION MODELS. BRAIN IMAGING OUTCOMES ~ SURGERIES VARIABLES .....                                                                                                      | 31       |
| <i>Table 13. Foundation models brain imaging ~ cumulative surgeries</i> .....                                                                                              | 31       |
| <i>Table 14. Foundation models brain imaging ~ surgery factored</i> .....                                                                                                  | 32       |
| <i>Table 15. Foundation models brain imaging ~ high complexity cumulative surgeries</i> .....                                                                              | 33       |
| FULLY ADJUSTED MODELS. PRIMARY BRAIN IMAGING OUTCOMES ~ SURGERIES VARIABLES .....                                                                                          | 34       |
| <i>Table 16. Fully adjusted models. primary brain imaging outcomes ~ cumulative surgeries</i> .....                                                                        | 34       |
| <i>Table 17. Fully adjusted models. primary brain imaging outcomes ~ surgery factored</i> .....                                                                            | 36       |
| <i>Table 18. Fully adjusted models. primary brain imaging outcomes ~ high complexity cumulative<br/>surgeries</i> .....                                                    | 38       |
| <i>Table 19. Models. secondary (DKT) brain imaging outcomes ~ cumulative surgeries</i> .....                                                                               | 40       |
| SENSITIVITY ANALYSES. STROKE AND 1SD/2SD COGNITIVE DECLINE .....                                                                                                           | 41       |
| <i>Table 20. Foundation models - reaction time stroke/no stroke datasets</i> .....                                                                                         | 41       |
| <i>Table 21. Fully adjusted models - reaction time with stroke/no stroke datasets</i> .....                                                                                | 42       |
| <i>Table 22. Foundation models - fluid intelligence and stroke/no stroke datasets</i> .....                                                                                | 45       |
| <i>Table 23. Fully adjusted models - fluid intelligence with stroke/no stroke datasets</i> .....                                                                           | 46       |
| <i>Table 24. Foundation models cognition ~ cumulative surgeries from baseline</i> .....                                                                                    | 49       |
| COGNITIVE DECLINE MODELS .....                                                                                                                                             | 51       |
| <i>Reaction time</i> .....                                                                                                                                                 | 51       |
| <i>Table 25. Foundation models. Reaction time 1SD/2SD cognitive decline ~ cumulative surgeries<br/>1·2 – 1·0 &amp; 1·3-1·2</i> .....                                       | 51       |
| <i>Table 26. Foundation models. Reaction time 1SD/2SD cognitive decline ~ cumulative surgeries<br/>as a factor 1·2 – 1·0 &amp; 1·3-1·2</i> .....                           | 51       |
| <i>Table 27. Foundation models. Reaction time 1SD/2SD cognitive decline ~ high complexity<br/>surgeries 1·2 – 1·0 &amp; 1·3-1·2</i> .....                                  | 51       |

|                                                                                                                                              |    |
|----------------------------------------------------------------------------------------------------------------------------------------------|----|
| Table 28. Foundation models. Reaction time 1SD/2SD cognitive decline ~ surgical admissions (binary) 1·2 – 1·0 & 1·3-1·2.....                 | 52 |
| Table 29. Foundation models. Reaction time 1SD/2SD cognitive decline ~ high complexity surgical admissions (binary) 1·2 – 1·0 & 1·3-1·2..... | 52 |
| REFERENCES.....                                                                                                                              | 54 |
| INDEX TO MAIN MANUSCRIPT.....                                                                                                                | 55 |

## Table of Figures

|                                                                                                                                                                 |    |
|-----------------------------------------------------------------------------------------------------------------------------------------------------------------|----|
| Figure 1 Histograms and density plots .....                                                                                                                     | 8  |
| Figure 2. Plots of actual and predicted values for fully adjusted models: association of cumulative surgeries at a specific age for all cognitive outcomes..... | 53 |

## Supplementary methods

Further detail is available in the UK Biobank data showcase at <https://biobank.ndph.ox.ac.uk/showcase/>.

**Table 1 - UK Biobank field references**

| Field reference | Label                                                               | Comments                                                                                                                                                |
|-----------------|---------------------------------------------------------------------|---------------------------------------------------------------------------------------------------------------------------------------------------------|
| eid             | Participant identifier                                              |                                                                                                                                                         |
| 21003           | Age when attended assessment centre                                 |                                                                                                                                                         |
| 31              | Sex                                                                 |                                                                                                                                                         |
| 53              | Date of attending assessment centre                                 |                                                                                                                                                         |
| 189 / 22189     | Townsend deprivation index                                          | This field was revised during the course of our analysis in favour of indices of multiple deprivation. We retained the original value for our analysis. |
| 2100            | Body mass index                                                     |                                                                                                                                                         |
| 20160           | Ever smoked                                                         |                                                                                                                                                         |
| 4598            | Ever depressed for a whole week                                     |                                                                                                                                                         |
| 1568            | average weekly red wine intake                                      | Used to derive average total weekly units of alcohol                                                                                                    |
| 1578            | average weekly champagne white wine                                 |                                                                                                                                                         |
| 1588            | average weekly beer plus cider intake                               |                                                                                                                                                         |
| 1598            | average weekly spirits intake                                       |                                                                                                                                                         |
| 1608            | average weekly fortified wine intake                                |                                                                                                                                                         |
| 4407            | average monthly red wine intake                                     |                                                                                                                                                         |
| 4418            | average monthly champagne plus white wine intake                    |                                                                                                                                                         |
| 4429            | average monthly beer plus cider intake                              |                                                                                                                                                         |
| 4440            | average monthly spirits intake                                      |                                                                                                                                                         |
| 4451            | average monthly fortified wine intake                               |                                                                                                                                                         |
| 4462            | average monthly intake of other alcoholic drinks                    |                                                                                                                                                         |
| 5364            | average weekly intake of other alcohol                              |                                                                                                                                                         |
| 22032           | International physical activity questionnaire activity group        |                                                                                                                                                         |
| 20016           | Fluid intelligence score                                            |                                                                                                                                                         |
| 20023           | Reaction time mean time to correctly identify matches               |                                                                                                                                                         |
| 20018           | Prospective memory result                                           |                                                                                                                                                         |
| 4282            | Numeric memory maximum digits remembered correctly                  |                                                                                                                                                         |
| 6348            | Duration to complete numeric path trail (TMTA)                      |                                                                                                                                                         |
| 6350            | Duration to complete alphanumeric path trail (TMTB)                 |                                                                                                                                                         |
| 20197           | Paired associate learning number of word pairs correctly associated |                                                                                                                                                         |
| 23323           | Number of symbol digit matches attempted                            | Used to derive mean symbol digit matches                                                                                                                |
| 23324           | Number of symbol digit matches made correctly                       | Used to derive mean symbol digit matches                                                                                                                |
| 25781           | Volume of white matter hyperintensities                             |                                                                                                                                                         |

Association between surgical admissions, cognition, and neurodegeneration in older people: UK  
Biobank population-based study – Supplementary Material

| Field reference | Label                                                         | Comments                                                         |
|-----------------|---------------------------------------------------------------|------------------------------------------------------------------|
| 25019           | Volume of hippocampus left                                    |                                                                  |
| 25020           | Volume of hippocampus right                                   |                                                                  |
| 20001           | Cancer code self-reported                                     | Used to determine leukaemia, lymphoma, solid tumour              |
| 20002           | Non cancer code self-reported                                 | Used to derive medical history. 1065 hypertension; 1220 diabetes |
| 41200           | Operative procedures main OPCS 4                              | Used to derive surgeries                                         |
| 41202           | Diagnoses main ICD10                                          | Used to derive hospital admissions                               |
| 41270           | Diagnoses (all) ICD10                                         | Used to determine 'ever dementia'                                |
| 27174           | Mean thickness of caudalanteriorcingulate (left hemisphere)   | Used to derive average DKT regions                               |
| 27267           | Mean thickness of caudalanteriorcingulate (right hemisphere)  |                                                                  |
| 27175           | Mean thickness of caudalmiddlefrontal (left hemisphere)       |                                                                  |
| 27268           | Mean thickness of caudalmiddlefrontal (right hemisphere)      |                                                                  |
| 27176           | Mean thickness of cuneus (left hemisphere)                    |                                                                  |
| 27269           | Mean thickness of cuneus (right hemisphere)                   |                                                                  |
| 27177           | Mean thickness of entorhinal (left hemisphere)                |                                                                  |
| 27270           | Mean thickness of entorhinal (right hemisphere)               |                                                                  |
| 27178           | Mean thickness of fusiform (left hemisphere)                  |                                                                  |
| 27271           | Mean thickness of fusiform (right hemisphere)                 |                                                                  |
| 27179           | Mean thickness of inferiorparietal (left hemisphere)          |                                                                  |
| 27272           | Mean thickness of inferiorparietal (right hemisphere)         |                                                                  |
| 27180           | Mean thickness of inferiortemporal (left hemisphere)          |                                                                  |
| 27273           | Mean thickness of inferiortemporal (right hemisphere)         |                                                                  |
| 27204           | Mean thickness of insula (left hemisphere)                    |                                                                  |
| 27297           | Mean thickness of insula (right hemisphere)                   |                                                                  |
| 27181           | Mean thickness of isthmuscingulate (left hemisphere)          |                                                                  |
| 27274           | Mean thickness of isthmuscingulate (right hemisphere)         |                                                                  |
| 27182           | Mean thickness of lateraloccipital (left hemisphere)          |                                                                  |
| 27275           | Mean thickness of lateraloccipital (right hemisphere)         |                                                                  |
| 27183           | Mean thickness of lateralorbitofrontal (left hemisphere)      |                                                                  |
| 27276           | Mean thickness of lateralorbitofrontal (right hemisphere)     |                                                                  |
| 27184           | Mean thickness of lingual (left hemisphere)                   |                                                                  |
| 27277           | Mean thickness of lingual (right hemisphere)                  |                                                                  |
| 27185           | Mean thickness of medialorbitofrontal (left hemisphere)       |                                                                  |
| 27278           | Mean thickness of medialorbitofrontal (right hemisphere)      |                                                                  |
| 27186           | Mean thickness of middletemporal (left hemisphere)            |                                                                  |
| 27279           | Mean thickness of middletemporal (right hemisphere)           |                                                                  |
| 27188           | Mean thickness of paracentral (left hemisphere)               |                                                                  |
| 27281           | Mean thickness of paracentral (right hemisphere)              |                                                                  |
| 27187           | Mean thickness of parahippocampal (left hemisphere)           |                                                                  |
| 27280           | Mean thickness of parahippocampal (right hemisphere)          |                                                                  |
| 27189           | Mean thickness of parsopercularis (left hemisphere)           |                                                                  |
| 27282           | Mean thickness of parsopercularis (right hemisphere)          |                                                                  |
| 27190           | Mean thickness of parsorbitalis (left hemisphere)             |                                                                  |
| 27283           | Mean thickness of parsorbitalis (right hemisphere)            |                                                                  |
| 27191           | Mean thickness of parstriangularis (left hemisphere)          |                                                                  |
| 27284           | Mean thickness of parstriangularis (right hemisphere)         |                                                                  |
| 27192           | Mean thickness of pericalcarine (left hemisphere)             |                                                                  |
| 27285           | Mean thickness of pericalcarine (right hemisphere)            |                                                                  |
| 27193           | Mean thickness of postcentral (left hemisphere)               |                                                                  |
| 27286           | Mean thickness of postcentral (right hemisphere)              |                                                                  |
| 27194           | Mean thickness of posteriorcingulate (left hemisphere)        |                                                                  |
| 27287           | Mean thickness of posteriorcingulate (right hemisphere)       |                                                                  |
| 27195           | Mean thickness of precentral (left hemisphere)                |                                                                  |
| 27288           | Mean thickness of precentral (right hemisphere)               |                                                                  |
| 27196           | Mean thickness of precuneus (left hemisphere)                 |                                                                  |
| 27289           | Mean thickness of precuneus (right hemisphere)                |                                                                  |
| 27197           | Mean thickness of rostralanteriorcingulate (left hemisphere)  |                                                                  |
| 27290           | Mean thickness of rostralanteriorcingulate (right hemisphere) |                                                                  |

Association between surgical admissions, cognition, and neurodegeneration in older people: UK  
 Biobank population-based study – Supplementary Material

| Field reference | Label                                                     | Comments |
|-----------------|-----------------------------------------------------------|----------|
| 27198           | Mean thickness of rostralmiddlefrontal (left hemisphere)  |          |
| 27291           | Mean thickness of rostralmiddlefrontal (right hemisphere) |          |
| 27199           | Mean thickness of superiorfrontal (left hemisphere)       |          |
| 27292           | Mean thickness of superiorfrontal (right hemisphere)      |          |
| 27200           | Mean thickness of superiorparietal (left hemisphere)      |          |
| 27293           | Mean thickness of superiorparietal (right hemisphere)     |          |
| 27201           | Mean thickness of superiortemporal (left hemisphere)      |          |
| 27294           | Mean thickness of superiortemporal (right hemisphere)     |          |
| 27202           | Mean thickness of supramarginal (left hemisphere)         |          |
| 27295           | Mean thickness of supramarginal (right hemisphere)        |          |
| 27203           | Mean thickness of transversetemporal (left hemisphere)    |          |
| 27296           | Mean thickness of transversetemporal (right hemisphere)   |          |

## Cognitive outcomes

Primary cognitive outcomes were reaction time, fluid intelligence, and prospective memory tests collected at Instance-0 (baseline), Instance-2 and Instance-3. As we did not have an *a priori* hypothesis that a specific cognitive domain would be vulnerable to surgery, we analysed each test individually, expecting convergent results across all three tests. All cognitive tests included in this analysis were conducted on supervised kiosks at assessment centres, usually after health questionnaires and prior to interview. All cognitive tests included in this analysis were conducted on supervised kiosks at assessment centres, usually after health questionnaires and prior to interview. The reaction time (Snap) test is a test of simple processing speed, measuring the mean duration in milliseconds until the button is pressed in rounds with correct paired matches. The fluid intelligence raw score is an unweighted sum of correct answers out of 13 language and mathematics questions. The prospective memory (Shape) test is a memory and inhibition test, the results of which we dichotomised as either correct on first attempt or not. Numeric memory raw score is the maximum digits remembered correctly in 12 rounds. Introduced from 2016, TMTA and TMTB raw scores use the duration to complete the pathway in deciseconds. The symbol digit substitution score was the mean number of correct matches. Paired associate learning was the number of word pairs correctly associated of 12 word-pairs.

## Brain imaging outcomes

Brain imaging was performed at UK Biobank assessment centres using a standard Siemens Skyra 3T running VD13A SP4 (as of October 2015), with a standard Siemens 32-channel RF receive head coil in accordance with UK Biobank imaging acquisition protocols.<sup>1,2</sup> Brain imaging data used in this analysis was T1-weighted structural imaging 1x1x1 mm resolution with a 208x256x256 matrix field of view from a 5-minute 3D MPRAGE sagittal scan with in-plane acceleration iPAT=2 and pre-scan normalisation. T2-weighted FLAIR structural imaging had 1.05x1x1 mm resolution, 192x256x256 matrix field of view from a 6-minute 3D SPACE, sagittal scan with in-plane acceleration iPAT=2, partial Fourier = 7/8, fat saturation, elliptical k-space scanning and pre-scan normalization.

We used two primary brain imaging outcomes pre-processed by UK Biobank. Volume of white matter hyperintensities (from T1 and T2 fluid attenuated inversion recovery [FLAIR] images); and the average volume of left and right hippocampi (from T1 structural brain MRI, subcortical volumes [Oxford Centre for Functional Magnetic Resonance Imaging of the Brain (FMRIB) Integrated Registration and Segmentation (FIRST) tool,<sup>3</sup>]. These variables were selected due to known associations with dementia and cognition.<sup>4-7</sup> Units were cubic

millimetres as outcome/dependent variables and z-scored using Instance-2 (imaging baseline) means and standard deviations as independent variables.

Secondary brain imaging outcomes were generated by UK Biobank using FreeSurfer image analysis suite<sup>8</sup> from T1 structural volumes with parcellation of the white surface using the Desikan-Killiany-Tourville (DKT31) cortical labelling protocol.<sup>9, 10</sup> We averaged the mean thicknesses of the 31 regions across hemispheres and adjusted type-3 p-values using false discovery rate (FDR) correction for multiple comparisons.

### Primary exposure and risk factors

As previously,<sup>11</sup> two clinicians categorised surgical severity/complexity as minor, intermediate, major, major plus, complex major operation, or excluded (such as diagnostic day procedures), using the National Health Service medical record main procedure code (OPCS-4) and BUPA Schedule of Procedures as at 15 June 2022. Cumulative surgeries were calculated as the sum of eligible procedures dated between eight years prior to baseline Instance-0 date of assessment (~1998) up to date of assessment of the respective instance. Hospital admissions were calculated using ICD10 main diagnosis codes. stroke (I61, I62, I63, I64, I66); and other medical admissions (not stroke).

Age was defined as age at Instance-0 and time as the duration in years from Instance-0 to the relevant assessment date. Risk factors for dementia (as identified by the Lancet Commission<sup>12</sup>) were tested as covariates, including education, alcohol consumption, hypertension, hearing difficulty, smoking, body mass index (BMI), depression, physical activity, and diabetes. We did not attempt to derive air pollution, head injury or social contact, although controlled for stroke hospital admissions. Leukaemia, lymphoma, and solid tumours were also included as covariates consistent with the Charlson index. Deprivation was calculated at Instance-0 using the Townsend deprivation index, based on previous national census data assessing unemployment, non-car ownership, non-home ownership, and overcrowding based on postcode. Data were not imputed, although history of smoking or depression were dichotomised as “yes” or “no/null”. Alcohol consumption was measured using the number of standard alcohol units consumed per week. Physical activity used the International Physical Activity Questionnaire activity group classification and history of hypertension, diabetes and solid tumour were obtained from self-reported medical history collected at interview.

Dementia-ever was defined using International Classification of Diseases version 10 (ICD10) codes. F00, F000, F001, F002, F009, G30, G300, G301, G308, G309, F01, F010, F011, F012, F013, F018, F019, I673, F020, G310, A810, F021, F022, F023, F024, F106, F02,

F028, F03, F051, G311, and G318. Stroke hospital admissions were derived using ICD10 main diagnosis codes. I61, I62, I63, I64, I66. Other medical admissions were derived as 'not stroke'.

Sensitivity analyses included comparison of these models across stroke/no stroke data subsets, and clinical change in cognition categorised as 1-2 standard deviations from baseline. Exploratory stratification analysis also tested surgeries into one of four groups. 0; 1-2; 3-5; and 6+ surgeries.



**Figure 1 Histograms and density plots**

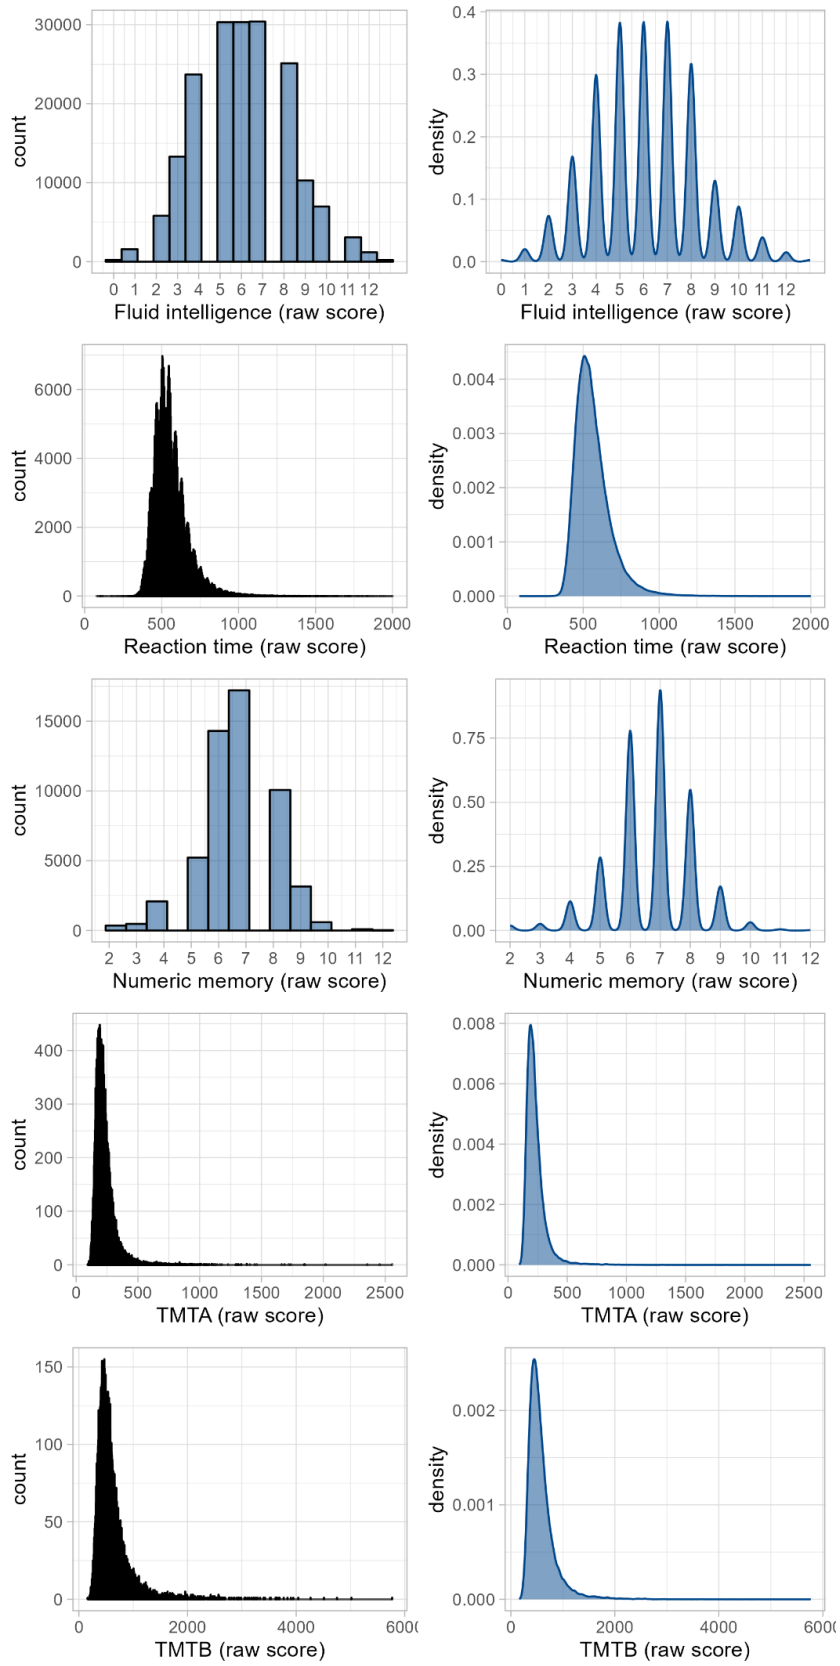

Association between surgical admissions, cognition, and neurodegeneration in older people: UK Biobank population-based study – Supplementary Material

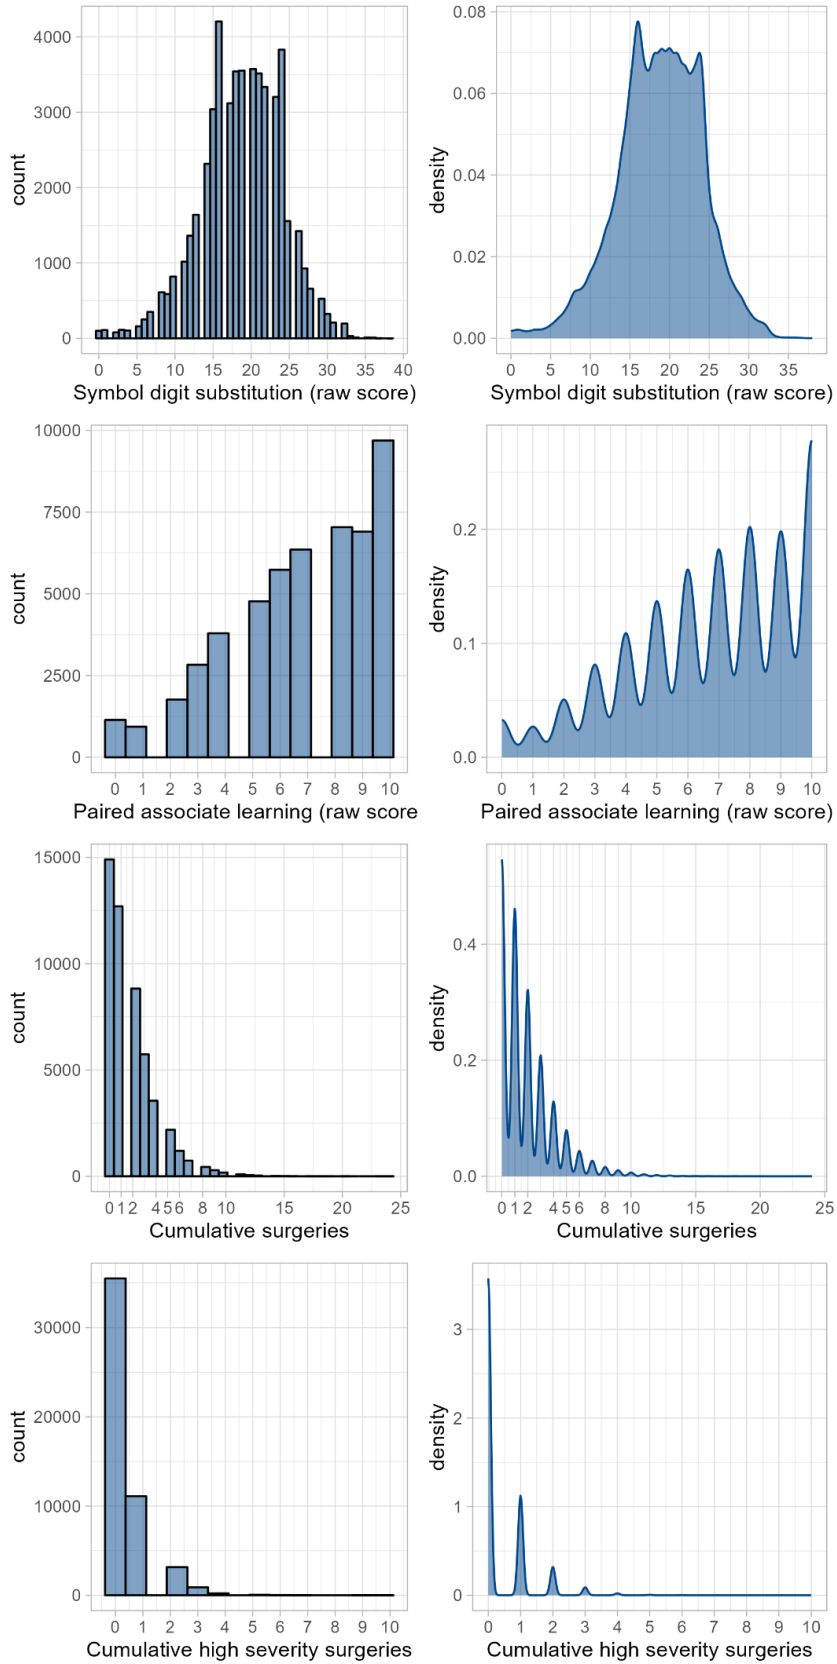

**Table 2. Model selection**

| Characteristic             | LMER. Outcome ~ surgeries + age + sex + (1 participant) |                |         | LMER. Outcome ~ surgeries + baseline age + time in years + sex + (1 participant) |                |         | LMER. Outcome ~ surgeries + baseline age + baseline age <sup>2</sup> + time in years + sex + (1 participant) |                |         | GAM. Outcome ~ surgeries + s(age, bs = "cr") + sex + s(participant, bs = "re") |                |         |
|----------------------------|---------------------------------------------------------|----------------|---------|----------------------------------------------------------------------------------|----------------|---------|--------------------------------------------------------------------------------------------------------------|----------------|---------|--------------------------------------------------------------------------------|----------------|---------|
|                            | Mean change per surgery                                 | 95% CI         | p-value | Mean change per surgery                                                          | 95% CI         | p-value | Mean change per surgery                                                                                      | 95% CI         | p-value | Mean change per surgery                                                        | 95% CI         | p-value |
| Cumulative Surgeries       | 2.761                                                   | 2.551, 2.972   |         | 1.986                                                                            | 1.771, 2.202   |         | 1.957                                                                                                        | 1.742, 2.173   |         | 2.172                                                                          | 1.960, 2.383   |         |
| Age each timepoint         | 4.195                                                   | 4.159, 4.231   |         |                                                                                  |                |         |                                                                                                              |                |         |                                                                                |                |         |
| Baseline age               |                                                         |                |         | 3.950                                                                            | 3.912, 3.989   |         | 0.880                                                                                                        | 0.325, 1.435   | 0.0019  |                                                                                |                |         |
| Baseline age <sup>2</sup>  |                                                         |                |         |                                                                                  |                |         | 27.853                                                                                                       | 22.831, 32.875 |         |                                                                                |                |         |
| Time                       |                                                         |                |         | 5.357                                                                            | 5.281, 5.434   |         | 5.373                                                                                                        | 5.296, 5.449   |         |                                                                                |                |         |
| Female sex<br>(Ref = Male) | 18.388                                                  | 17.768, 19.009 |         | 18.430                                                                           | 17.809, 19.051 |         | 18.545                                                                                                       | 17.924, 19.166 |         | 18.740                                                                         | 18.146, 19.333 |         |
| s(Age)                     |                                                         |                |         |                                                                                  |                |         |                                                                                                              |                |         |                                                                                |                |         |
| s(participant id)          |                                                         |                |         |                                                                                  |                |         |                                                                                                              |                |         |                                                                                |                | 0.6450  |
| No. observations           | 544520                                                  |                |         | 544520                                                                           |                |         | 544520                                                                                                       |                |         | 544520                                                                         |                |         |
| BIC                        | 6,660,960                                               |                |         | 6,659,853                                                                        |                |         | <b>6,659,744</b>                                                                                             |                |         | 6,675,376                                                                      |                |         |

All p<0.0001 unless indicated.

**Table 3. Expanded demographics table by cognitive outcomes**

| Characteristic                                      | All data                |                                |                               | Reaction time           |                                |                               | Fluid intelligence      |                                |                               | Prospective memory      |                                |                               | Numeric memory         |                                |                               | TMTA                           |                               | TMTB                           |                               | SDST                           |                               | Paired associate learning      |                               |
|-----------------------------------------------------|-------------------------|--------------------------------|-------------------------------|-------------------------|--------------------------------|-------------------------------|-------------------------|--------------------------------|-------------------------------|-------------------------|--------------------------------|-------------------------------|------------------------|--------------------------------|-------------------------------|--------------------------------|-------------------------------|--------------------------------|-------------------------------|--------------------------------|-------------------------------|--------------------------------|-------------------------------|
|                                                     | 0<br>N =<br>492802<br>1 | 2<br>N =<br>71873 <sup>1</sup> | 3<br>N =<br>6324 <sup>1</sup> | 0<br>N =<br>487271<br>1 | 2<br>N =<br>65366 <sup>1</sup> | 3<br>N =<br>5681 <sup>1</sup> | 0<br>N =<br>162964<br>1 | 2<br>N =<br>64700 <sup>1</sup> | 3<br>N =<br>5658 <sup>1</sup> | 0<br>N =<br>168755<br>1 | 2<br>N =<br>65694 <sup>1</sup> | 3<br>N =<br>5781 <sup>1</sup> | 0<br>N =<br>50934<br>1 | 2<br>N =<br>43124 <sup>1</sup> | 3<br>N =<br>5091 <sup>1</sup> | 2<br>N =<br>53257 <sup>1</sup> | 3<br>N =<br>5781 <sup>1</sup> | 2<br>N =<br>53257 <sup>1</sup> | 3<br>N =<br>5781 <sup>1</sup> | 2<br>N =<br>52743 <sup>1</sup> | 3<br>N =<br>5680 <sup>1</sup> | 2<br>N =<br>53257 <sup>1</sup> | 3<br>N =<br>5781 <sup>1</sup> |
| Age, mean (SD), y                                   | 56 (8)                  | 65 (8)                         | 65 (7)                        | 56 (8)                  | 65 (8)                         | 65 (7)                        | 57 (8)                  | 65 (8)                         | 65 (7)                        | 57 (8)                  | 65 (8)                         | 65 (7)                        | 56 (8)                 | 65 (8)                         | 64 (7)                        | 66 (8)                         | 65 (7)                        | 66 (8)                         | 65 (7)                        | 65 (8)                         | 65 (7)                        | 66 (8)                         | 65 (7)                        |
| Sex, female                                         | 268,733 (55%)           | 37,118 (52%)                   | 3,256 (51%)                   | 265,840 (55%)           | 33,618 (51%)                   | 2,929 (52%)                   | 89,017 (55%)            | 33,311 (51%)                   | 2,925 (52%)                   | 92,059 (55%)            | 33,786 (51%)                   | 2,969 (51%)                   | 27,773 (55%)           | 22,201 (51%)                   | 2,622 (52%)                   | 27,389 (51%)                   | 2,969 (51%)                   | 27,389 (51%)                   | 2,969 (51%)                   | 27,117 (51%)                   | 2,931 (52%)                   | 27,389 (51%)                   | 2,969 (51%)                   |
| Ethnic background                                   |                         |                                |                               |                         |                                |                               |                         |                                |                               |                         |                                |                               |                        |                                |                               |                                |                               |                                |                               |                                |                               |                                |                               |
| Asian                                               | 11,296 (2.3%)           | 1,038 (1.4%)                   | 79 (1.2%)                     | 10,495 (2.2%)           | 885 (1.4%)                     | 72 (1.3%)                     | 5,184 (3.2%)            | 849 (1.3%)                     | 66 (1.2%)                     | 6,486 (3.8%)            | 896 (1.4%)                     | 73 (1.3%)                     | 1,629 (3.2%)           | 552 (1.3%)                     | 68 (1.3%)                     | 710 (1.3%)                     | 73 (1.3%)                     | 710 (1.3%)                     | 73 (1.3%)                     | 700 (1.3%)                     | 72 (1.3%)                     | 710 (1.3%)                     | 73 (1.3%)                     |
| Black                                               | 7,914 (1.6%)            | 516 (0.7%)                     | 38 (0.6%)                     | 7,455 (1.5%)            | 413 (0.6%)                     | 34 (0.6%)                     | 3,909 (2.4%)            | 404 (0.6%)                     | 33 (0.6%)                     | 4,505 (2.7%)            | 417 (0.6%)                     | 35 (0.6%)                     | 440 (0.9%)             | 267 (0.6%)                     | 34 (0.7%)                     | 346 (0.6%)                     | 35 (0.6%)                     | 346 (0.6%)                     | 35 (0.6%)                     | 336 (0.6%)                     | 34 (0.6%)                     | 346 (0.6%)                     | 35 (0.6%)                     |
| White                                               | 463,474 (94%)           | 69,322 (96%)                   | 6,144 (97%)                   | 460,416 (94%)           | 63,191 (97%)                   | 5,516 (97%)                   | 150,172 (92%)           | 62,589 (97%)                   | 5,500 (97%)                   | 153,524 (91%)           | 63,501 (97%)                   | 5,614 (97%)                   | 48,073 (94%)           | 41,764 (97%)                   | 4,935 (97%)                   | 51,471 (97%)                   | 5,614 (97%)                   | 51,471 (97%)                   | 5,614 (97%)                   | 50,985 (97%)                   | 5,515 (97%)                   | 51,471 (97%)                   | 5,614 (97%)                   |
| Do not know/Prefer not to answer                    | 1,832 (0.4%)            | 193 (0.3%)                     | 13 (0.2%)                     | 1,746 (0.4%)            | 172 (0.3%)                     | 12 (0.2%)                     | 643 (0.4%)              | 170 (0.3%)                     | 12 (0.2%)                     | 789 (0.5%)              | 172 (0.3%)                     | 12 (0.2%)                     | 175 (0.3%)             | 98 (0.2%)                      | 10 (0.2%)                     | 134 (0.3%)                     | 12 (0.2%)                     | 134 (0.3%)                     | 12 (0.2%)                     | 134 (0.3%)                     | 12 (0.2%)                     | 134 (0.3%)                     | 12 (0.2%)                     |
| Other                                               | 7,417 (1.5%)            | 776 (1.1%)                     | 48 (0.8%)                     | 7,121 (1.5%)            | 683 (1.0%)                     | 45 (0.8%)                     | 3,056 (1.9%)            | 666 (1.0%)                     | 45 (0.8%)                     | 3,451 (2.0%)            | 686 (1.0%)                     | 45 (0.8%)                     | 617 (1.2%)             | 431 (1.0%)                     | 42 (0.8%)                     | 578 (1.1%)                     | 45 (0.8%)                     | 578 (1.1%)                     | 45 (0.8%)                     | 570 (1.1%)                     | 45 (0.8%)                     | 578 (1.1%)                     | 45 (0.8%)                     |
| Missing                                             | 869 (0.2%)              | 28 (<0.1%)                     | 2 (<0.1%)                     | 38 (<0.1%)              | 22 (<0.1%)                     | 2 (<0.1%)                     | 0 (0%)                  | 22 (<0.1%)                     | 2 (<0.1%)                     | 0 (0%)                  | 22 (<0.1%)                     | 2 (<0.1%)                     | 0 (0%)                 | 12 (<0.1%)                     | 2 (<0.1%)                     | 18 (<0.1%)                     | 2 (<0.1%)                     | 18 (<0.1%)                     | 2 (<0.1%)                     | 18 (<0.1%)                     | 2 (<0.1%)                     | 18 (<0.1%)                     | 2 (<0.1%)                     |
| Townsend Deprivation Index at Instance-0, mean (SD) | -1.30 (3.09)            | -1.85 (2.75)                   | -1.92 (2.66)                  | -1.33 (3.07)            | -1.87 (2.74)                   | -1.91 (2.67)                  | -1.17 (2.91)            | -1.88 (2.73)                   | -1.91 (2.66)                  | -1.11 (2.95)            | -1.87 (2.74)                   | -1.91 (2.67)                  | -1.46 (2.80)           | -1.88 (2.74)                   | -1.94 (2.66)                  | -1.86 (2.75)                   | -1.91 (2.67)                  | -1.86 (2.75)                   | -1.91 (2.67)                  | -1.86 (2.75)                   | -1.91 (2.66)                  | -1.86 (2.75)                   | -1.91 (2.67)                  |
| Education                                           |                         |                                |                               |                         |                                |                               |                         |                                |                               |                         |                                |                               |                        |                                |                               |                                |                               |                                |                               |                                |                               |                                |                               |
| Secondary <12 years                                 | 134,863 (27%)           | 16,308 (23%)                   | 1,453 (23%)                   | 133,910 (27%)           | 15,179 (23%)                   | 1,371 (24%)                   | 46,019 (28%)            | 14,959 (23%)                   | 1,364 (24%)                   | 47,296 (28%)            | 15,250 (23%)                   | 1,398 (24%)                   | 14,907 (29%)           | 9,713 (23%)                    | 1,223 (24%)                   | 12,193 (23%)                   | 1,398 (24%)                   | 12,193 (23%)                   | 1,398 (24%)                   | 12,069 (23%)                   | 1,370 (24%)                   | 12,193 (23%)                   | 1,398 (24%)                   |
| Secondary 12 years                                  | 35,836 (7.3%)           | 5,712 (7.9%)                   | 523 (8.3%)                    | 35,638 (7.3%)           | 5,441 (8.3%)                   | 496 (8.7%)                    | 12,406 (7.6%)           | 5,410 (8.4%)                   | 494 (8.7%)                    | 12,673 (7.5%)           | 5,466 (8.3%)                   | 505 (8.7%)                    | 3,590 (7.0%)           | 3,526 (8.2%)                   | 453 (8.9%)                    | 4,455 (8.4%)                   | 505 (8.7%)                    | 4,455 (8.4%)                   | 505 (8.7%)                    | 4,423 (8.4%)                   | 496 (8.7%)                    | 4,455 (8.4%)                   | 505 (8.7%)                    |
| Tertiary >12 years                                  | 230,355 (47%)           | 42,735 (59%)                   | 3,707 (59%)                   | 229,180 (47%)           | 40,363 (62%)                   | 3,533 (62%)                   | 80,181 (49%)            | 40,142 (62%)                   | 3,524 (62%)                   | 81,599 (48%)            | 40,560 (62%)                   | 3,595 (62%)                   | 23,770 (47%)           | 27,037 (63%)                   | 3,175 (62%)                   | 33,078 (62%)                   | 3,595 (62%)                   | 33,078 (62%)                   | 3,595 (62%)                   | 32,842 (62%)                   | 3,538 (62%)                   | 33,078 (62%)                   | 3,595 (62%)                   |
| None of the above                                   | 82,002 (17%)            | 4,637 (6.5%)                   | 292 (4.6%)                    | 80,005 (16%)            | 3,991 (6.1%)                   | 264 (4.6%)                    | 22,918 (14%)            | 3,812 (5.9%)                   | 260 (4.6%)                    | 25,305 (15%)            | 4,024 (6.1%)                   | 266 (4.6%)                    | 8,125 (16%)            | 2,579 (6.0%)                   | 225 (4.4%)                    | 3,183 (6.0%)                   | 266 (4.6%)                    | 3,183 (6.0%)                   | 266 (4.6%)                    | 3,073 (5.8%)                   | 260 (4.6%)                    | 3,183 (6.0%)                   | 266 (4.6%)                    |
| Prefer not to answer                                | 5,279 (1.1%)            | 297 (0.4%)                     | 17 (0.3%)                     | 4,966 (1.0%)            | 241 (0.4%)                     | 13 (0.2%)                     | 1,440 (0.9%)            | 227 (0.4%)                     | 12 (0.2%)                     | 1,882 (1.1%)            | 241 (0.4%)                     | 13 (0.2%)                     | 542 (1.1%)             | 151 (0.4%)                     | 12 (0.2%)                     | 198 (0.4%)                     | 13 (0.2%)                     | 198 (0.4%)                     | 13 (0.2%)                     | 189 (0.4%)                     | 12 (0.2%)                     | 198 (0.4%)                     | 13 (0.2%)                     |

Association between surgical admissions, cognition, and neurodegeneration in older people: UK Biobank population-based study – Supplementary Material

| Characteristic                                         | All data                |                                |                               | Reaction time           |                                |                               | Fluid intelligence      |                                |                               | Prospective memory      |                                |                               | Numeric memory         |                                |                               | TMTA                           |                               | TMTB                           |                               | SDST                           |                               | Paired associate learning      |                               |
|--------------------------------------------------------|-------------------------|--------------------------------|-------------------------------|-------------------------|--------------------------------|-------------------------------|-------------------------|--------------------------------|-------------------------------|-------------------------|--------------------------------|-------------------------------|------------------------|--------------------------------|-------------------------------|--------------------------------|-------------------------------|--------------------------------|-------------------------------|--------------------------------|-------------------------------|--------------------------------|-------------------------------|
|                                                        | 0<br>N =<br>492802<br>1 | 2<br>N =<br>71873 <sup>1</sup> | 3<br>N =<br>6324 <sup>1</sup> | 0<br>N =<br>487271<br>1 | 2<br>N =<br>65366 <sup>1</sup> | 3<br>N =<br>5681 <sup>1</sup> | 0<br>N =<br>162964<br>1 | 2<br>N =<br>64700 <sup>1</sup> | 3<br>N =<br>5658 <sup>1</sup> | 0<br>N =<br>168755<br>1 | 2<br>N =<br>65694 <sup>1</sup> | 3<br>N =<br>5781 <sup>1</sup> | 0<br>N =<br>50934<br>1 | 2<br>N =<br>43124 <sup>1</sup> | 3<br>N =<br>5091 <sup>1</sup> | 2<br>N =<br>53257 <sup>1</sup> | 3<br>N =<br>5781 <sup>1</sup> | 2<br>N =<br>53257 <sup>1</sup> | 3<br>N =<br>5781 <sup>1</sup> | 2<br>N =<br>52743 <sup>1</sup> | 3<br>N =<br>5680 <sup>1</sup> | 2<br>N =<br>53257 <sup>1</sup> | 3<br>N =<br>5781 <sup>1</sup> |
| Missing                                                | 4,467<br>(0.9%)         | 2,184<br>(3.0%)                | 332<br>(5.2%)                 | 3,572<br>(0.7%)         | 151<br>(0.2%)                  | 4<br>(<0.1%)                  | 0 (0%)                  | 150<br>(0.2%)                  | 4<br>(<0.1%)                  | 0 (0%)                  | 153<br>(0.2%)                  | 4<br>(<0.1%)                  | 0<br>(0%)              | 118<br>(0.3%)                  | 3<br>(<0.1%)                  | 150<br>(0.3%)                  | 4<br>(<0.1%)                  | 150<br>(0.3%)                  | 4<br>(<0.1%)                  | 147<br>(0.3%)                  | 4<br>(<0.1%)                  | 150<br>(0.3%)                  | 4<br>(<0.1%)                  |
| BMI, kg/m <sup>2</sup><br>mean (SD)                    | 27.4<br>(4.8)           | 26.7<br>(4.5)                  | 26.4<br>(4.4)                 | 27.4<br>(4.8)           | 26.6<br>(4.5)                  | 26.4<br>(4.4)                 | 27.4<br>(4.8)           | 26.6<br>(4.5)                  | 26.4<br>(4.4)                 | 27.4<br>(4.8)           | 26.6<br>(4.5)                  | 26.4<br>(4.4)                 | 27.4<br>(4.8)          | 26.6<br>(4.5)                  | 26.4<br>(4.4)                 |
| Ever smoked                                            | 292,623<br>(59%)        | 43,628<br>(61%)                | 3,805<br>(60%)                | 290,412<br>(60%)        | 39,630<br>(61%)                | 3,398<br>(60%)                | 97,542<br>(60%)         | 39,234<br>(61%)                | 3,386<br>(60%)                | 100,180<br>(59%)        | 39,828<br>(61%)                | 3,465<br>(60%)                | 30,244<br>(59%)        | 25,998<br>(60%)                | 3,049<br>(60%)                | 32,179<br>(60%)                | 3,465<br>(60%)                | 32,179<br>(60%)                | 3,465<br>(60%)                | 31,866<br>(60%)                | 3,400<br>(60%)                | 32,179<br>(60%)                | 3,465<br>(60%)                |
| Hearing difficulty                                     | 118,962<br>(24%)        | 27,858<br>(39%)                | 2,627<br>(42%)                | 117,911<br>(24%)        | 25,414<br>(39%)                | 2,374<br>(42%)                | 42,158<br>(26%)         | 25,156<br>(39%)                | 2,365<br>(42%)                | 43,506<br>(26%)         | 25,567<br>(39%)                | 2,415<br>(42%)                | 13,178<br>(26%)        | 16,949<br>(39%)                | 2,099<br>(41%)                | 21,006<br>(39%)                | 2,415<br>(42%)                | 21,006<br>(39%)                | 2,415<br>(42%)                | 20,785<br>(39%)                | 2,367<br>(42%)                | 21,006<br>(39%)                | 2,415<br>(42%)                |
| Ever depression                                        | 87,982<br>(18%)         | 38,520<br>(54%)                | 3,918<br>(62%)                | 87,119<br>(18%)         | 35,662<br>(55%)                | 3,535<br>(62%)                | 85,171<br>(52%)         | 35,334<br>(55%)                | 3,529<br>(62%)                | 87,579<br>(52%)         | 35,837<br>(55%)                | 3,610<br>(62%)                | 26,516<br>(52%)        | 23,512<br>(55%)                | 3,192<br>(63%)                | 28,744<br>(54%)                | 3,610<br>(62%)                | 28,744<br>(54%)                | 3,610<br>(62%)                | 28,477<br>(54%)                | 3,540<br>(62%)                | 28,744<br>(54%)                | 3,610<br>(62%)                |
| Weekly alcohol intake,<br>standard units,<br>mean (SD) | 15 (18)                 | 13 (15)                        | 13 (15)                       | 15 (18)                 | 14 (15)                        | 14 (16)                       | 15 (17)                 | 14 (15)                        | 14 (15)                       | 14 (17)                 | 14 (15)                        | 14 (16)                       | 15 (17)                | 14 (15)                        | 14 (15)                       | 14 (15)                        | 14 (16)                       | 14 (15)                        | 14 (16)                       | 14 (15)                        | 14 (16)                       | 14 (15)                        | 14 (16)                       |
| IPAQ physical activity at Instance-0                   |                         |                                |                               |                         |                                |                               |                         |                                |                               |                         |                                |                               |                        |                                |                               |                                |                               |                                |                               |                                |                               |                                |                               |
| Low                                                    | 70,318<br>(14%)         | 10,929<br>(15%)                | 931<br>(15%)                  | 69,730<br>(14%)         | 10,041<br>(15%)                | 839<br>(15%)                  | 22,186<br>(14%)         | 9,969<br>(15%)                 | 838<br>(15%)                  | 22,823<br>(14%)         | 10,078<br>(15%)                | 850<br>(15%)                  | 6,531<br>(13%)         | 6,581<br>(15%)                 | 769<br>(15%)                  | 8,112<br>(15%)                 | 850<br>(15%)                  | 8,112<br>(15%)                 | 850<br>(15%)                  | 8,063<br>(15%)                 | 839<br>(15%)                  | 8,112<br>(15%)                 | 850<br>(15%)                  |
| Moderate                                               | 153,857<br>(31%)        | 25,001<br>(35%)                | 2,202<br>(35%)                | 152,913<br>(31%)        | 22,878<br>(35%)                | 1,985<br>(35%)                | 52,150<br>(32%)         | 22,698<br>(35%)                | 1,976<br>(35%)                | 53,312<br>(32%)         | 22,992<br>(35%)                | 2,020<br>(35%)                | 15,660<br>(31%)        | 15,324<br>(36%)                | 1,751<br>(34%)                | 18,820<br>(35%)                | 2,020<br>(35%)                | 18,820<br>(35%)                | 2,020<br>(35%)                | 18,675<br>(35%)                | 1,983<br>(35%)                | 18,820<br>(35%)                | 2,020<br>(35%)                |
| High                                                   | 154,546<br>(31%)        | 23,927<br>(33%)                | 2,222<br>(35%)                | 153,474<br>(31%)        | 21,740<br>(33%)                | 2,001<br>(35%)                | 54,558<br>(33%)         | 21,496<br>(33%)                | 1,996<br>(35%)                | 55,831<br>(33%)         | 21,841<br>(33%)                | 2,035<br>(35%)                | 17,637<br>(35%)        | 14,230<br>(33%)                | 1,789<br>(35%)                | 17,703<br>(33%)                | 2,035<br>(35%)                | 17,703<br>(33%)                | 2,035<br>(35%)                | 17,531<br>(33%)                | 2,004<br>(35%)                | 17,703<br>(33%)                | 2,035<br>(35%)                |
| Missing                                                | 114,081<br>(23%)        | 12,016<br>(17%)                | 969<br>(15%)                  | 111,154<br>(23%)        | 10,707<br>(16%)                | 856<br>(15%)                  | 34,070<br>(21%)         | 10,537<br>(16%)                | 848<br>(15%)                  | 36,789<br>(22%)         | 10,783<br>(16%)                | 876<br>(15%)                  | 11,106<br>(22%)        | 6,989<br>(16%)                 | 782<br>(15%)                  | 8,622<br>(16%)                 | 876<br>(15%)                  | 8,622<br>(16%)                 | 876<br>(15%)                  | 8,474<br>(16%)                 | 854<br>(15%)                  | 8,622<br>(16%)                 | 876<br>(15%)                  |
| Hypertension                                           | 133,789<br>(27%)        | 19,458<br>(27%)                | 1,655<br>(26%)                | 132,139<br>(27%)        | 17,573<br>(27%)                | 1,486<br>(26%)                | 43,759<br>(27%)         | 17,339<br>(27%)                | 1,476<br>(26%)                | 45,767<br>(27%)         | 17,685<br>(27%)                | 1,515<br>(26%)                | 13,593<br>(27%)        | 11,577<br>(27%)                | 1,317<br>(26%)                | 14,134<br>(27%)                | 1,515<br>(26%)                | 14,134<br>(27%)                | 1,515<br>(26%)                | 13,950<br>(26%)                | 1,482<br>(26%)                | 14,134<br>(27%)                | 1,515<br>(26%)                |
| Myocardial infarction ever                             | 11,685<br>(2.4%)        | 1,461<br>(2.0%)                | 132<br>(2.1%)                 | 11,475<br>(2.4%)        | 1,293<br>(2.0%)                | 118<br>(2.1%)                 | 3,617<br>(2.2%)         | 1,268<br>(2.0%)                | 118<br>(2.1%)                 | 3,835<br>(2.3%)         | 1,301<br>(2.0%)                | 123<br>(2.1%)                 | 1,255<br>(2.5%)        | 881<br>(2.0%)                  | 111<br>(2.2%)                 | 1,041<br>(2.0%)                | 123<br>(2.1%)                 | 1,041<br>(2.0%)                | 123<br>(2.1%)                 | 1,023<br>(1.9%)                | 117<br>(2.1%)                 | 1,041<br>(2.0%)                | 123<br>(2.1%)                 |
| Stroke ever                                            | 6,773<br>(1.4%)         | 871<br>(1.2%)                  | 82<br>(1.3%)                  | 6,621<br>(1.4%)         | 746<br>(1.1%)                  | 71<br>(1.2%)                  | 2,005<br>(1.2%)         | 736<br>(1.1%)                  | 70<br>(1.2%)                  | 2,168<br>(1.3%)         | 751<br>(1.1%)                  | 73<br>(1.3%)                  | 621<br>(1.2%)          | 481<br>(1.1%)                  | 61<br>(1.2%)                  | 585<br>(1.1%)                  | 73<br>(1.3%)                  | 585<br>(1.1%)                  | 73<br>(1.3%)                  | 576<br>(1.1%)                  | 71<br>(1.3%)                  | 585<br>(1.1%)                  | 73<br>(1.3%)                  |
| Diabetes ever                                          | 22,107<br>(4.5%)        | 2,807<br>(3.9%)                | 251<br>(4.0%)                 | 21,595<br>(4.4%)        | 2,486<br>(3.8%)                | 228<br>(4.0%)                 | 7,524<br>(4.6%)         | 2,444<br>(3.8%)                | 223<br>(3.9%)                 | 8,150<br>(4.8%)         | 2,505<br>(3.8%)                | 235<br>(4.1%)                 | 2,155<br>(4.2%)        | 1,638<br>(3.8%)                | 204<br>(4.0%)                 | 1,954<br>(3.7%)                | 235<br>(4.1%)                 | 1,954<br>(3.7%)                | 235<br>(4.1%)                 | 1,927<br>(3.7%)                | 230<br>(4.0%)                 | 1,954<br>(3.7%)                | 235<br>(4.1%)                 |
| Lymphoma ever                                          | 1,966<br>(0.4%)         | 341<br>(0.5%)                  | 25<br>(0.4%)                  | 1,951<br>(0.4%)         | 314<br>(0.5%)                  | 22<br>(0.4%)                  | 643<br>(0.4%)           | 306<br>(0.5%)                  | 22<br>(0.4%)                  | 668<br>(0.4%)           | 316<br>(0.5%)                  | 23<br>(0.4%)                  | 172<br>(0.3%)          | 210<br>(0.5%)                  | 21<br>(0.4%)                  | 257<br>(0.5%)                  | 23<br>(0.4%)                  | 257<br>(0.5%)                  | 23<br>(0.4%)                  | 256<br>(0.5%)                  | 22<br>(0.4%)                  | 257<br>(0.5%)                  | 23<br>(0.4%)                  |

Association between surgical admissions, cognition, and neurodegeneration in older people: UK Biobank population-based study – Supplementary Material

| Characteristic                               | All data                        |                                |                               | Reaction time                   |                                |                               | Fluid intelligence              |                                |                               | Prospective memory              |                                |                               | Numeric memory                 |                                |                               | TMTA                           |                               | TMTB                           |                               | SDST                           |                               | Paired associate learning      |                               |
|----------------------------------------------|---------------------------------|--------------------------------|-------------------------------|---------------------------------|--------------------------------|-------------------------------|---------------------------------|--------------------------------|-------------------------------|---------------------------------|--------------------------------|-------------------------------|--------------------------------|--------------------------------|-------------------------------|--------------------------------|-------------------------------|--------------------------------|-------------------------------|--------------------------------|-------------------------------|--------------------------------|-------------------------------|
|                                              | 0<br>N =<br>492802 <sub>1</sub> | 2<br>N =<br>71873 <sup>1</sup> | 3<br>N =<br>6324 <sup>1</sup> | 0<br>N =<br>487271 <sub>1</sub> | 2<br>N =<br>65366 <sup>1</sup> | 3<br>N =<br>5681 <sup>1</sup> | 0<br>N =<br>162964 <sub>1</sub> | 2<br>N =<br>64700 <sup>1</sup> | 3<br>N =<br>5658 <sup>1</sup> | 0<br>N =<br>168755 <sub>1</sub> | 2<br>N =<br>65694 <sup>1</sup> | 3<br>N =<br>5781 <sup>1</sup> | 0<br>N =<br>50934 <sub>1</sub> | 2<br>N =<br>43124 <sup>1</sup> | 3<br>N =<br>5091 <sup>1</sup> | 2<br>N =<br>53257 <sup>1</sup> | 3<br>N =<br>5781 <sup>1</sup> | 2<br>N =<br>53257 <sup>1</sup> | 3<br>N =<br>5781 <sup>1</sup> | 2<br>N =<br>52743 <sup>1</sup> | 3<br>N =<br>5680 <sup>1</sup> | 2<br>N =<br>53257 <sup>1</sup> | 3<br>N =<br>5781 <sup>1</sup> |
| Solid tumour ever                            | 41,813<br>(8.5%)                | 8,684<br>(12%)                 | 740<br>(12%)                  | 41,441<br>(8.5%)                | 7,928<br>(12%)                 | 657<br>(12%)                  | 13,844<br>(8.5%)                | 7,820<br>(12%)                 | 656<br>(12%)                  | 14,253<br>(8.4%)                | 7,964<br>(12%)                 | 677<br>(12%)                  | 4,217<br>(8.3%)                | 5,141<br>(12%)                 | 598<br>(12%)                  | 6,581<br>(12%)                 | 677<br>(12%)                  | 6,581<br>(12%)                 | 677<br>(12%)                  | 6,518<br>(12%)                 | 658<br>(12%)                  | 6,581<br>(12%)                 | 677<br>(12%)                  |
| Cumulative Surgeries, mean (SD)              | 0.84<br>(1.30)                  | 1.87<br>(2.09)                 | 1.89<br>(2.01)                | 0.84<br>(1.30)                  | 1.83<br>(2.06)                 | 1.86<br>(2.01)                | 0.86<br>(1.32)                  | 1.83<br>(2.05)                 | 1.86<br>(2.01)                | 0.87<br>(1.33)                  | 1.83<br>(2.06)                 | 1.86<br>(2.01)                | 0.87<br>(1.32)                 | 1.85<br>(2.04)                 | 1.82<br>(1.98)                | 1.92<br>(2.11)                 | 1.86<br>(2.01)                | 1.92<br>(2.11)                 | 1.86<br>(2.01)                | 1.91<br>(2.10)                 | 1.86<br>(2.01)                | 1.92<br>(2.11)                 | 1.86<br>(2.01)                |
| Cumulative Surgeries                         |                                 |                                |                               |                                 |                                |                               |                                 |                                |                               |                                 |                                |                               |                                |                                |                               |                                |                               |                                |                               |                                |                               |                                |                               |
| 0                                            | 273,564<br>(56%)                | 21,369<br>(30%)                | 1,760<br>(28%)                | 270,821<br>(56%)                | 19,860<br>(30%)                | 1,606<br>(28%)                | 89,556<br>(55%)                 | 19,711<br>(30%)                | 1,603<br>(28%)                | 92,358<br>(55%)                 | 19,948<br>(30%)                | 1,635<br>(28%)                | 27,695<br>(54%)                | 12,841<br>(30%)                | 1,468<br>(29%)                | 15,350<br>(29%)                | 1,635<br>(28%)                | 15,350<br>(29%)                | 1,635<br>(28%)                | 15,219<br>(29%)                | 1,606<br>(28%)                | 15,350<br>(29%)                | 1,635<br>(28%)                |
| 1-2                                          | 171,644<br>(35%)                | 30,165<br>(42%)                | 2,726<br>(43%)                | 169,618<br>(35%)                | 27,521<br>(42%)                | 2,461<br>(43%)                | 57,190<br>(35%)                 | 27,230<br>(42%)                | 2,449<br>(43%)                | 59,337<br>(35%)                 | 27,655<br>(42%)                | 2,500<br>(43%)                | 18,153<br>(36%)                | 18,259<br>(42%)                | 2,222<br>(44%)                | 22,397<br>(42%)                | 2,500<br>(43%)                | 22,397<br>(42%)                | 2,500<br>(43%)                | 22,212<br>(42%)                | 2,458<br>(43%)                | 22,397<br>(42%)                | 2,500<br>(43%)                |
| 3-5                                          | 41,813<br>(8.5%)                | 15,882<br>(22%)                | 1,481<br>(23%)                | 41,175<br>(8.5%)                | 14,139<br>(22%)                | 1,298<br>(23%)                | 14,223<br>(8.7%)                | 13,970<br>(22%)                | 1,290<br>(23%)                | 14,940<br>(8.9%)                | 14,224<br>(22%)                | 1,325<br>(23%)                | 4,469<br>(8.8%)                | 9,508<br>(22%)                 | 1,138<br>(22%)                | 12,095<br>(23%)                | 1,325<br>(23%)                | 12,095<br>(23%)                | 1,325<br>(23%)                | 11,944<br>(23%)                | 1,299<br>(23%)                | 12,095<br>(23%)                | 1,325<br>(23%)                |
| 6+                                           | 5,781<br>(1.2%)                 | 4,457<br>(6.2%)                | 357<br>(5.6%)                 | 5,657<br>(1.2%)                 | 3,846<br>(5.9%)                | 316<br>(5.6%)                 | 1,995<br>(1.2%)                 | 3,789<br>(5.9%)                | 316<br>(5.6%)                 | 2,120<br>(1.3%)                 | 3,867<br>(5.9%)                | 321<br>(5.6%)                 | 617<br>(1.2%)                  | 2,516<br>(5.8%)                | 263<br>(5.2%)                 | 3,415<br>(6.4%)                | 321<br>(5.6%)                 | 3,415<br>(6.4%)                | 321<br>(5.6%)                 | 3,368<br>(6.4%)                | 317<br>(5.6%)                 | 3,415<br>(6.4%)                | 321<br>(5.6%)                 |
| Reaction time, milliseconds, mean(SD)        | 559<br>(117)                    | 601<br>(112)                   | 594<br>(108)                  | 559<br>(117)                    | 601<br>(112)                   | 594<br>(108)                  | 567<br>(121)                    | 601<br>(112)                   | 594<br>(106)                  | 568<br>(123)                    | 601<br>(112)                   | 594<br>(108)                  | 567<br>(124)                   | 603<br>(113)                   | 592<br>(108)                  | 605<br>(114)                   | 594<br>(108)                  | 605<br>(114)                   | 594<br>(108)                  | 604<br>(113)                   | 594<br>(106)                  | 605<br>(114)                   | 594<br>(108)                  |
| Fluid intelligence, correct, mean (SD)       | 5.99<br>(2.16)                  | 6.48<br>(2.07)                 | 6.74<br>(2.02)                | 6.00<br>(2.15)                  | 6.49<br>(2.07)                 | 6.74<br>(2.02)                | 5.99<br>(2.16)                  | 6.48<br>(2.07)                 | 6.74<br>(2.02)                | 5.99<br>(2.16)                  | 6.48<br>(2.07)                 | 6.74<br>(2.02)                | 6.01<br>(2.12)                 | 6.45<br>(2.04)                 | 6.77<br>(2.01)                | 6.40<br>(2.05)                 | 6.74<br>(2.02)                | 6.40<br>(2.05)                 | 6.74<br>(2.02)                | 6.41<br>(2.05)                 | 6.74<br>(2.02)                | 6.40<br>(2.05)                 | 6.74<br>(2.02)                |
| Prospective memory, correct on first attempt | 129,271<br>(77%)                | 53,693<br>(82%)                | 4,973<br>(86%)                | 128,925<br>(77%)                | 53,527<br>(82%)                | 4,921<br>(87%)                | 126,007<br>(77%)                | 53,086<br>(82%)                | 4,906<br>(87%)                | 129,271<br>(77%)                | 53,693<br>(82%)                | 4,973<br>(86%)                | 38,865<br>(76%)                | 34,665<br>(80%)                | 4,391<br>(86%)                | 42,602<br>(80%)                | 4,973<br>(86%)                | 42,602<br>(80%)                | 4,973<br>(86%)                | 42,329<br>(80%)                | 4,919<br>(87%)                | 42,602<br>(80%)                | 4,973<br>(86%)                |
| Numeric memory, maximum correct, mean (SD)   | 6.49<br>(1.82)                  | 6.62<br>(1.55)                 | 6.67<br>(1.76)                | 6.50<br>(1.79)                  | 6.65<br>(1.49)                 | 6.80<br>(1.49)                | 6.55<br>(1.73)                  | 6.66<br>(1.46)                 | 6.82<br>(1.41)                | 6.49<br>(1.82)                  | 6.62<br>(1.55)                 | 6.67<br>(1.76)                | 6.49<br>(1.82)                 | 6.62<br>(1.55)                 | 6.67<br>(1.76)                | 6.62<br>(1.55)                 | 6.67<br>(1.76)                | 6.62<br>(1.55)                 | 6.67<br>(1.76)                | 6.66<br>(1.47)                 | 6.80<br>(1.48)                | 6.62<br>(1.55)                 | 6.67<br>(1.76)                |
| TMTA at Instance-2, deciseconds, mean (SD)   |                                 | 230<br>(90)                    | 218<br>(89)                   |                                 | 230<br>(90)                    | 221<br>(86)                   |                                 | 230<br>(89)                    | 221<br>(86)                   |                                 | 230<br>(90)                    | 218<br>(89)                   |                                | 228<br>(92)                    | 216<br>(90)                   | 230<br>(90)                    | 218<br>(89)                   | 230<br>(90)                    | 218<br>(89)                   | 231<br>(88)                    | 221<br>(86)                   | 230<br>(90)                    | 218<br>(89)                   |
| TMTB at Instance-2, deciseconds, mean (SD)   |                                 | 570<br>(294)                   | 528<br>(261)                  |                                 | 571<br>(292)                   | 535<br>(255)                  |                                 | 571<br>(291)                   | 535<br>(253)                  |                                 | 570<br>(294)                   | 528<br>(261)                  |                                | 564<br>(291)                   | 521<br>(255)                  | 570<br>(294)                   | 528<br>(261)                  | 570<br>(294)                   | 528<br>(261)                  | 572<br>(290)                   | 537<br>(254)                  | 570<br>(294)                   | 528<br>(261)                  |
| SDST at Instance-2, matches, mean (SD)       |                                 | 18.6<br>(5.3)                  | 19.7<br>(5.3)                 |                                | 18.7<br>(5.3)                  | 19.8<br>(5.3)                 | 18.6<br>(5.3)                  | 19.7<br>(5.3)                 | 18.6<br>(5.3)                  | 19.7<br>(5.3)                 | 18.6<br>(5.3)                  | 19.7<br>(5.3)                 | 18.6<br>(5.3)                  | 19.7<br>(5.3)                 |

| Characteristic                                                  | All data                |                                |                               | Reaction time           |                                |                               | Fluid intelligence      |                                |                               | Prospective memory      |                                |                               | Numeric memory         |                                |                               | TMTA                           |                               | TMTB                           |                               | SDST                           |                               | Paired associate learning      |                               |
|-----------------------------------------------------------------|-------------------------|--------------------------------|-------------------------------|-------------------------|--------------------------------|-------------------------------|-------------------------|--------------------------------|-------------------------------|-------------------------|--------------------------------|-------------------------------|------------------------|--------------------------------|-------------------------------|--------------------------------|-------------------------------|--------------------------------|-------------------------------|--------------------------------|-------------------------------|--------------------------------|-------------------------------|
|                                                                 | 0<br>N =<br>492802<br>1 | 2<br>N =<br>71873 <sup>1</sup> | 3<br>N =<br>6324 <sup>1</sup> | 0<br>N =<br>487271<br>1 | 2<br>N =<br>65366 <sup>1</sup> | 3<br>N =<br>5681 <sup>1</sup> | 0<br>N =<br>162964<br>1 | 2<br>N =<br>64700 <sup>1</sup> | 3<br>N =<br>5658 <sup>1</sup> | 0<br>N =<br>168755<br>1 | 2<br>N =<br>65694 <sup>1</sup> | 3<br>N =<br>5781 <sup>1</sup> | 0<br>N =<br>50934<br>1 | 2<br>N =<br>43124 <sup>1</sup> | 3<br>N =<br>5091 <sup>1</sup> | 2<br>N =<br>53257 <sup>1</sup> | 3<br>N =<br>5781 <sup>1</sup> | 2<br>N =<br>53257 <sup>1</sup> | 3<br>N =<br>5781 <sup>1</sup> | 2<br>N =<br>52743 <sup>1</sup> | 3<br>N =<br>5680 <sup>1</sup> | 2<br>N =<br>53257 <sup>1</sup> | 3<br>N =<br>5781 <sup>1</sup> |
| Paired associate learning at Instance-2, matches, mean (SD)     |                         | 6.73<br>(2.66)                 | 7.11<br>(2.59)                |                         | 6.74<br>(2.65)                 | 7.15<br>(2.55)                |                         | 6.76<br>(2.63)                 | 7.17<br>(2.53)                |                         | 6.73<br>(2.66)                 | 7.11<br>(2.59)                |                        | 6.77<br>(2.66)                 | 7.16<br>(2.59)                | 6.73<br>(2.66)                 | 7.11<br>(2.59)                | 6.73<br>(2.66)                 | 7.11<br>(2.59)                | 6.77<br>(2.62)                 | 7.17<br>(2.53)                | 6.73<br>(2.66)                 | 7.11<br>(2.59)                |
| Vol white matter hyperintensities, cubic millimetres, mean (SD) |                         | 5,216<br>(6,877)               | 5,176<br>(6,553)              |                         | 5,069<br>(6,677)               | 5,039<br>(6,404)              |                         | 5,054<br>(6,652)               | 5,028<br>(6,360)              |                         | 5,084<br>(6,699)               | 5,074<br>(6,446)              |                        | 5,450<br>(7,045)               | 5,074<br>(6,446)              | 5,478<br>(7,066)               | 5,074<br>(6,446)              | 5,478<br>(7,066)               | 5,074<br>(6,446)              | 5,439<br>(7,027)               | 5,011<br>(6,337)              | 5,478<br>(7,066)               | 5,074<br>(6,446)              |
| Vol avg hippocampus, cubic millimetres, mean (SD)               |                         | 3,818<br>(447)                 | 3,814<br>(439)                |                         | 3,827<br>(445)                 | 3,820<br>(436)                |                         | 3,828<br>(444)                 | 3,821<br>(434)                |                         | 3,826<br>(445)                 | 3,819<br>(435)                |                        | 3,815<br>(450)                 | 3,819<br>(435)                | 3,814<br>(450)                 | 3,819<br>(435)                | 3,814<br>(450)                 | 3,819<br>(435)                | 3,816<br>(450)                 | 3,821<br>(434)                | 3,814<br>(450)                 | 3,819<br>(435)                |

Data are presented as no. of patients (% within group), unless otherwise stated.

TMTA = trail making test A (numeric); TMTB = trail making test B (alphanumeric); SDST = symbol digit substitution; IPAQ = International Physical Activity Questionnaire activity groups.

**Table 4. I-0 participants returning at I-2**

| Characteristic                   | I-2, N = 71,873 <sup>1</sup> | No I-2, N = 420,929 <sup>1</sup> | p-value <sup>2</sup> |
|----------------------------------|------------------------------|----------------------------------|----------------------|
| Age                              | 55 (49, 61)                  | 58 (50, 63)                      | <0.0001              |
| Sex Female                       | 37,118 (52%)                 | 231,615 (55%)                    | <0.0001              |
| Ethnic background                |                              |                                  | <0.0001              |
| Asian                            | 1,038 (1.4%)                 | 10,258 (2.4%)                    |                      |
| Black                            | 516 (0.7%)                   | 7,398 (1.8%)                     |                      |
| Do not know/Prefer not to answer | 193 (0.3%)                   | 1,639 (0.4%)                     |                      |
| Other                            | 776 (1.1%)                   | 6,641 (1.6%)                     |                      |
| White                            | 69,322 (96%)                 | 394,152 (94%)                    |                      |
| Townsend Deprivation Index       | -2.58 (-3.88, -0.40)         | -2.05 (-3.59, 0.70)              | <0.0001              |
| Education                        |                              |                                  | <0.0001              |
| None of the above                | 4,822 (6.8%)                 | 77,180 (18%)                     |                      |
| Prefer not to answer             | 250 (0.4%)                   | 5,029 (1.2%)                     |                      |
| Secondary <12 years              | 16,727 (24%)                 | 118,136 (28%)                    |                      |
| Secondary 12 years               | 5,782 (8.1%)                 | 30,054 (7.2%)                    |                      |
| Tertiary >12 years               | 43,406 (61%)                 | 186,949 (45%)                    |                      |
| BMI                              | 26.1 (23.7, 28.9)            | 26.9 (24.2, 30.1)                | <0.0001              |
| Ever smoked                      | 41,237 (57%)                 | 251,386 (60%)                    | <0.0001              |
| Hearing difficulty               | 16,270 (23%)                 | 102,692 (24%)                    | <0.0001              |
| Ever depression                  | 12,279 (17%)                 | 75,703 (18%)                     | <0.0001              |
| Average weekly alcohol units     | 12 (3, 24)                   | 10 (0, 21)                       | <0.0001              |
| IPAQ physical activity           |                              |                                  | <0.0001              |
| High                             | 23,927 (33%)                 | 130,619 (31%)                    |                      |
| Low                              | 10,929 (15%)                 | 59,389 (14%)                     |                      |
| Missing                          | 12,016 (17%)                 | 102,065 (24%)                    |                      |
| Moderate                         | 25,001 (35%)                 | 128,856 (31%)                    |                      |
| Hypertension                     | 19,458 (27%)                 | 114,331 (27%)                    | 0.6207               |
| Myocardial infarction            | 1,461 (2.0%)                 | 10,224 (2.4%)                    | <0.0001              |
| Stroke                           | 871 (1.2%)                   | 5,902 (1.4%)                     | 0.0001               |
| Diabetes                         | 2,807 (3.9%)                 | 19,300 (4.6%)                    | <0.0001              |
| Lymphoma                         | 341 (0.5%)                   | 1,625 (0.4%)                     | 0.0005               |
| Solid tumour                     | 8,684 (12%)                  | 33,129 (7.9%)                    | <0.0001              |
| Cumulative Surgeries, mean (SD)  | 0.63 (1.03)                  | 0.88 (1.34)                      | <0.0001              |
| Cumulative Surgeries factored    |                              |                                  | <0.0001              |
| 0                                | 44,497 (62%)                 | 229,067 (54%)                    |                      |



Association between surgical admissions, cognition, and neurodegeneration in older people: UK  
Biobank population-based study – Supplementary Material

| Characteristic                            | I-2, N = 71,873 <sup>1</sup> | No I-2, N = 420,929 <sup>1</sup> | p-value <sup>2</sup> |
|-------------------------------------------|------------------------------|----------------------------------|----------------------|
| 1-2                                       | 23,224 (32%)                 | 148,420 (35%)                    |                      |
| 3-5                                       | 3,861 (5.4%)                 | 37,952 (9.0%)                    |                      |
| 6+                                        | 291 (0.4%)                   | 5,490 (1.3%)                     |                      |
| Reaction time, milliseconds               | 520 (469, 586)               | 539 (481, 614)                   | <0.0001              |
| Fluid intelligence, correct               | 7 (5, 8)                     | 6 (4, 7)                         | <0.0001              |
| Prospective memory, correct-first-attempt | 20,374 (86%)                 | 108,897 (75%)                    | <0.0001              |
| Numeric memory, maximum correct           | 7 (6, 8)                     | 7 (6, 7)                         | <0.0001              |

<sup>1</sup>Median (IQR); n (%)

<sup>2</sup>Wilcoxon rank sum test; Pearson's Chi-squared test

## Foundation models. cognitive outcomes ~ surgeries variables

Table 5. Foundation models cognitive outcomes ~ cumulative surgeries

| Characteristic                       | Reaction time, milliseconds |                     |         | Fluid intelligence, correct |                     |         | Prospective memory, correct-first-time (logistic) |                     |         | Numeric memory, maximum correct |                     |         | TMTA, deciseconds       |                     |         | TMTB, deciseconds       |                     |         | SDST, matches           |                     |         | Paired associate learning, matches |                     |         |
|--------------------------------------|-----------------------------|---------------------|---------|-----------------------------|---------------------|---------|---------------------------------------------------|---------------------|---------|---------------------------------|---------------------|---------|-------------------------|---------------------|---------|-------------------------|---------------------|---------|-------------------------|---------------------|---------|------------------------------------|---------------------|---------|
|                                      | Mean change per surgery     | 95% CI <sup>1</sup> | p-value | Mean change per surgery     | 95% CI <sup>1</sup> | p-value | OR <sup>1</sup>                                   | 95% CI <sup>1</sup> | p-value | Mean change per surgery         | 95% CI <sup>1</sup> | p-value | Mean change per surgery | 95% CI <sup>1</sup> | p-value | Mean change per surgery | 95% CI <sup>1</sup> | p-value | Mean change per surgery | 95% CI <sup>1</sup> | p-value | Mean change per surgery            | 95% CI <sup>1</sup> | p-value |
| Cumulative Surgeries                 | 1.957                       | 1.742, 2.173        |         | -0.114                      | -0.121, -0.107      |         | 0.927                                             | 0.919, 0.935        |         | -0.052                          | -0.060, -0.044      |         | 1.681                   | 1.320, 2.043        |         | 8.562                   | 7.426, 9.698        |         | -0.193                  | -0.214, -0.173      |         | -0.099                             | -0.110, -0.088      |         |
| Time in years                        | 5.373                       | 5.296, 5.449        |         | 0.023                       | 0.021, 0.026        |         | 1.071                                             | 1.066, 1.077        |         | -0.008                          | 0.011, -0.005       |         | -0.233                  | 0.451, -0.015       | 0.0363  | -0.378                  | 0.918, 0.163        | 0.1711  | 0.038                   | 0.027, 0.049        |         | 0.023                              | 0.017, 0.029        |         |
| Baseline age                         | 0.880                       | 0.325, 1.435        | 0.0019  | 0.251                       | 0.233, 0.270        |         | 1.173                                             | 1.147, 1.199        |         | 0.068                           | 0.048, 0.088        |         | -8.204                  | 9.620, -6.789       |         | -                       | 28.867, -19.923     |         | 0.152                   | 0.070, 0.234        | 0.0003  | 0.102                              | 0.059, 0.146        |         |
| Baseline age <sup>2</sup> normalised | 27.853                      | 22.831, 32.875      |         | -2.368                      | -2.533, -2.202      |         | 0.187                                             | 0.153, 0.228        |         | -0.784                          | 0.965, -0.604       |         | 108.206                 | 95.160, 121.251     |         | 336.585                 | 295.328, 377.843    |         | -4.168                  | 4.921, -3.414       |         | -1.513                             | -1.913, -1.113      |         |
| Sex Female                           | 18.545                      | 17.924, 19.166      |         | -0.249                      | 0.270, -0.229       |         | 0.918                                             | 0.896, 0.942        |         | -0.235                          | 0.258, -0.212       |         | -4.550                  | 6.039, -3.061       |         | -0.851                  | 5.537, 3.836        | 0.7220  | 0.099                   | 0.012, 0.185        | 0.0248  | 0.811                              | 0.765, 0.856        |         |
| No. Obs.                             | 544,520                     |                     |         | 182,490                     |                     |         | 189,725                                           |                     |         | 54,211                          |                     |         | 50,374                  |                     |         | 49,128                  |                     |         | 50,393                  |                     |         | 50,968                             |                     |         |
| Log-likelihood                       | -3,329,819                  |                     |         | -391,363                    |                     |         | -97,375                                           |                     |         | -91,012                         |                     |         | -294,020                |                     |         | -341,047                |                     |         | -149,552                |                     |         | -119,523                           |                     |         |
| AIC                                  | 6,659,655                   |                     |         | 782,741                     |                     |         | 194,765                                           |                     |         | 182,040                         |                     |         | 588,057                 |                     |         | 682,109                 |                     |         | 299,121                 |                     |         | 239,062                            |                     |         |
| BIC                                  | 6,659,744                   |                     |         | 782,822                     |                     |         | 194,836                                           |                     |         | 182,111                         |                     |         | 588,127                 |                     |         | 682,180                 |                     |         | 299,191                 |                     |         | 239,133                            |                     |         |
| Residual df                          | 544,512                     |                     |         | 182,482                     |                     |         | 189,718                                           |                     |         | 54,203                          |                     |         | 50,366                  |                     |         | 49,120                  |                     |         | 50,385                  |                     |         | 50,960                             |                     |         |

<sup>1</sup>CI = Confidence Interval; OR = Odds Ratio; TMTA = trail making test A; TMTB = trail making test B; SDST = symbol digit substitution. All available data were used across instances 0, 2, 3. All p<0.0001 unless indicated.

<sup>2</sup>All models were linear mixed effects models of all available data. Foundation models were minimally adjusted. cognitive outcome ~ surgeries + age + age<sup>2</sup> normalised/1000 + time + female sex + (1|participant).

**Table 6. Foundation models cognitive outcomes ~ surgery factored**

| Characteristic                       | Reaction time, milliseconds |                     |         | Fluid intelligence, correct |                     |         | Prospective memory, correct-first-time (logistic) |                     |         | Numeric memory, maximum correct |                     |         | TMTA, deciseconds        |                     |         | TMTB, deciseconds        |                     |         | SDST, matches            |                     |         | Paired associate learning, matches |                     |         |
|--------------------------------------|-----------------------------|---------------------|---------|-----------------------------|---------------------|---------|---------------------------------------------------|---------------------|---------|---------------------------------|---------------------|---------|--------------------------|---------------------|---------|--------------------------|---------------------|---------|--------------------------|---------------------|---------|------------------------------------|---------------------|---------|
|                                      | Mean change per category    | 95% CI <sup>1</sup> | p-value | Mean change per category    | 95% CI <sup>1</sup> | p-value | log(OR) <sup>1</sup>                              | 95% CI <sup>1</sup> | p-value | Mean change per category        | 95% CI <sup>1</sup> | p-value | Mean change per category | 95% CI <sup>1</sup> | p-value | Mean change per category | 95% CI <sup>1</sup> | p-value | Mean change per category | 95% CI <sup>1</sup> | p-value | Mean change per category           | 95% CI <sup>1</sup> | p-value |
| Cumulative Surgeries factored        |                             |                     |         |                             |                     |         |                                                   |                     |         |                                 |                     |         |                          |                     |         |                          |                     |         |                          |                     |         |                                    |                     |         |
| 1-2                                  | 2.528                       | 1.886, 3.170        |         | -0.224                      | -0.245, -0.203      |         | 0.886                                             | 0.862, 0.910        |         | -0.087                          | 0.111, -0.063       |         | 3.859                    | 2.080, 5.638        |         | 17.077                   | 11.547, 22.606      |         | -0.448                   | -0.550, -0.346      |         | -0.209                             | -0.264, -0.155      |         |
| 3-5                                  | 7.632                       | 6.598, 8.665        |         | -0.455                      | -0.488, -0.422      |         | 0.732                                             | 0.702, 0.763        |         | -0.208                          | 0.246, -0.169       |         | 7.614                    | 5.525, 9.702        |         | 34.617                   | 28.096, 41.138      |         | -0.822                   | -0.942, -0.702      |         | -0.417                             | -0.481, -0.353      |         |
| 6+                                   | 12.456                      | 10.188, 14.724      |         | -0.665                      | -0.737, -0.593      |         | 0.641                                             | 0.584, 0.703        |         | -0.270                          | 0.357, -0.184       |         | 11.602                   | 8.294, 14.911       |         | 65.452                   | 55.082, 75.822      |         | -1.416                   | -1.607, -1.226      |         | -0.726                             | -0.827, -0.625      |         |
| Time in years                        | 5.390                       | 5.313, 5.466        |         | 0.023                       | 0.020, 0.025        |         | 1.071                                             | 1.066, 1.076        |         | -0.009                          | 0.012, -0.005       |         | -0.236                   | -0.454, -0.018      | 0.0340  | -0.381                   | -0.922, 0.160       | 0.1676  | 0.039                    | 0.028, 0.050        |         | 0.023                              | 0.018, 0.029        |         |
| Baseline age                         | 0.874                       | 0.319, 1.429        | 0.0020  | 0.252                       | 0.233, 0.270        |         | 1.173                                             | 1.147, 1.199        |         | 0.068                           | 0.048, 0.088        |         | -8.228                   | 9.644, -6.813       |         | -24.446                  | 28.919, -19.973     |         | 0.155                    | 0.073, 0.236        | 0.0002  | 0.103                              | 0.060, 0.147        |         |
| Baseline age <sup>2</sup> normalised | 27.935                      | 22.913, 32.958      |         | -2.369                      | -2.535, -2.203      |         | 0.187                                             | 0.153, 0.228        |         | -0.784                          | 0.965, -0.604       |         | 108.444                  | 95.397, 121.490     |         | 337.170                  | 295.907, 378.433    |         | -4.195                   | -4.949, -3.441      |         | -1.526                             | -1.926, -1.126      |         |
| Sex Female                           | 18.540                      | 17.919, 19.162      |         | -0.247                      | -0.268, -0.227      |         | 0.919                                             | 0.896, 0.942        |         | -0.235                          | 0.258, -0.212       |         | -4.580                   | 6.070, -3.090       |         | -0.971                   | 5.659, 3.717        | 0.6848  | 0.102                    | 0.016, 0.188        | 0.0200  | 0.812                              | 0.766, 0.858        |         |
| No. Obs.                             | 544,520                     |                     |         | 182,490                     |                     |         | 189,725                                           |                     |         | 54,211                          |                     |         | 50,374                   |                     |         | 49,128                   |                     |         | 50,393                   |                     |         | 50,968                             |                     |         |
| Log-likelihood                       | -3,329,830                  |                     |         | -391,356                    |                     |         | -97,381                                           |                     |         | -91,024                         |                     |         | -294,020                 |                     |         | -341,047                 |                     |         | -149,567                 |                     |         | -119,540                           |                     |         |
| AIC                                  | 6,659,681                   |                     |         | 782,732                     |                     |         | 194,780                                           |                     |         | 182,067                         |                     |         | 588,060                  |                     |         | 682,114                  |                     |         | 299,155                  |                     |         | 239,099                            |                     |         |
| BIC                                  | 6,659,793                   |                     |         | 782,833                     |                     |         | 194,871                                           |                     |         | 182,156                         |                     |         | 588,148                  |                     |         | 682,202                  |                     |         | 299,243                  |                     |         | 239,187                            |                     |         |
| Residual df                          | 544,510                     |                     |         | 182,480                     |                     |         | 189,716                                           |                     |         | 54,201                          |                     |         | 50,364                   |                     |         | 49,118                   |                     |         | 50,383                   |                     |         | 50,958                             |                     |         |

<sup>1</sup>CI = Confidence Interval; OR = Odds Ratio; TMTA = trail making test A; TMTB = trail making test B; SDST = symbol digit substitution. All available data were used across instances 0, 2, 3.

<sup>2</sup>All models were linear mixed effects models of all available data. Foundation models were minimally adjusted. cognitive outcome ~ surgeries + age + age<sup>2</sup> normalised/1000 + time + female sex + (1|participant). All p<0.0001 unless indicated.

**Table 7. Foundation models cognitive outcome ~ high complexity surgeries**

| Characteristic                        | Reaction time, milliseconds |                     |         | Fluid intelligence, correct |                     |         | Prospective memory, correct-first-time (logistic) |                     |         | Numeric memory, maximum correct |                     |         | TMTA, deciseconds       |                     |         | TMTB, deciseconds       |                     |         | SDST, matches           |                     |         | Paired associate learning, matches |                     |         |
|---------------------------------------|-----------------------------|---------------------|---------|-----------------------------|---------------------|---------|---------------------------------------------------|---------------------|---------|---------------------------------|---------------------|---------|-------------------------|---------------------|---------|-------------------------|---------------------|---------|-------------------------|---------------------|---------|------------------------------------|---------------------|---------|
|                                       | Mean change per surgery     | 95% CI <sup>1</sup> | p-value | Mean change per surgery     | 95% CI <sup>1</sup> | p-value | OR <sup>1</sup>                                   | 95% CI <sup>1</sup> | p-value | Mean change per surgery         | 95% CI <sup>1</sup> | p-value | Mean change per surgery | 95% CI <sup>1</sup> | p-value | Mean change per surgery | 95% CI <sup>1</sup> | p-value | Mean change per surgery | 95% CI <sup>1</sup> | p-value | Mean change per surgery            | 95% CI <sup>1</sup> | p-value |
| Cumulative Major+Major++CMO Surgeries | 2.970                       | 2.429, 3.511        |         | -0.155                      | -0.172, -0.137      |         | 0.893                                             | 0.874, 0.912        |         | -0.068                          | 0.088, -0.048       |         | 3.086                   | 2.090, 4.083        |         | 14.355                  | 11.232, 17.477      |         | -0.301                  | 0.358, -0.243       |         | -0.184                             | 0.214, -0.153       |         |
| Time in years                         | 5.512                       | 5.437, 5.586        |         | 0.014                       | 0.012, 0.017        |         | 1.065                                             | 1.060, 1.070        |         | -0.012                          | 0.016, -0.009       |         | -0.220                  | 0.439, -0.002       | 0.0477  | -0.285                  | 0.826, 0.255        | 0.3008  | 0.036                   | 0.025, 0.047        |         | 0.023                              | 0.017, 0.028        |         |
| Baseline age                          | 0.875                       | 0.320, 1.431        | 0.0020  | 0.252                       | 0.234, 0.271        |         | 1.173                                             | 1.147, 1.199        |         | 0.068                           | 0.048, 0.087        |         | -8.234                  | 9.650, -6.817       |         | -24.598                 | 29.077, -20.119     |         | 0.157                   | 0.075, 0.239        | 0.0002  | 0.104                              | 0.060, 0.147        |         |
| Baseline age <sup>2</sup> normalised  | 28.119                      | 23.095, 33.144      |         | -2.390                      | 2.557, -2.224       |         | 0.185                                             | 0.152, 0.226        |         | -0.790                          | 0.971, -0.609       |         | 108.690                 | 95.636, 121.743     |         | 339.694                 | 298.371, 381.017    |         | -4.247                  | 5.002, -3.491       |         | -1.540                             | 1.941, -1.139       |         |
| Sex Female                            | 18.491                      | 17.869, 19.113      |         | -0.247                      | 0.268, -0.227       |         | 0.920                                             | 0.898, 0.944        |         | -0.235                          | 0.258, -0.211       |         | -4.772                  | 6.265, -3.278       |         | -1.862                  | 6.566, 2.842        | 0.4379  | 0.119                   | 0.033, 0.206        | 0.0069  | 0.824                              | 0.778, 0.870        |         |
| No. Obs.                              | 544,520                     |                     |         | 182,490                     |                     |         | 189,725                                           |                     |         | 54,211                          |                     |         | 50,374                  |                     |         | 49,128                  |                     |         | 50,393                  |                     |         | 50,968                             |                     |         |
| Log-likelihood                        | -3,329,919                  |                     |         | -391,716                    |                     |         | -97,490                                           |                     |         | -91,069                         |                     |         | -294,042                |                     |         | -341,114                |                     |         | -149,664                |                     |         | -119,606                           |                     |         |
| AIC                                   | 6,659,854                   |                     |         | 783,448                     |                     |         | 194,995                                           |                     |         | 182,154                         |                     |         | 588,101                 |                     |         | 682,244                 |                     |         | 299,343                 |                     |         | 239,228                            |                     |         |
| BIC                                   | 6,659,943                   |                     |         | 783,529                     |                     |         | 195,066                                           |                     |         | 182,225                         |                     |         | 588,172                 |                     |         | 682,314                 |                     |         | 299,414                 |                     |         | 239,299                            |                     |         |
| Residual df                           | 544,512                     |                     |         | 182,482                     |                     |         | 189,718                                           |                     |         | 54,203                          |                     |         | 50,366                  |                     |         | 49,120                  |                     |         | 50,385                  |                     |         | 50,960                             |                     |         |

<sup>1</sup>CI = Confidence Interval; OR = Odds Ratio; TMTA = trail making test A; TMTB = trail making test B; SDST = symbol digit substitution. All available data were used across instances 0, 2, 3. All p<0.0001 unless indicated.

<sup>2</sup>All models were linear mixed effects models of all available data. Foundation models were minimally adjusted. cognitive outcome ~ surgeries + age + age<sup>2</sup> normalised/1000 + time + female sex + (1|participant).

Fully adjusted models. cognitive outcomes ~ surgeries variables

Table 8· Fully adjusted models cognitive outcome ~ cumulative surgeries

| Characteristic                       | Reaction time, milliseconds |                     |         | Fluid intelligence, correct |                     |         | Prospective memory, correct-first-time (logistic) |                     |         | Numeric memory, maximum correct |                     |         | TMTA, deciseconds       |                     |         | TMTB, deciseconds       |                     |         | SDST, matches           |                     |         | Paired associate learning, matches |                     |         |
|--------------------------------------|-----------------------------|---------------------|---------|-----------------------------|---------------------|---------|---------------------------------------------------|---------------------|---------|---------------------------------|---------------------|---------|-------------------------|---------------------|---------|-------------------------|---------------------|---------|-------------------------|---------------------|---------|------------------------------------|---------------------|---------|
|                                      | Mean change per surgery     | 95% CI <sup>1</sup> | p-value | Mean change per surgery     | 95% CI <sup>1</sup> | p-value | OR <sup>1</sup>                                   | 95% CI <sup>1</sup> | p-value | Mean change per surgery         | 95% CI <sup>1</sup> | p-value | Mean change per surgery | 95% CI <sup>1</sup> | p-value | Mean change per surgery | 95% CI <sup>1</sup> | p-value | Mean change per surgery | 95% CI <sup>1</sup> | p-value | Mean change per surgery            | 95% CI <sup>1</sup> | p-value |
| Cumulative Surgeries                 | 0.273                       | 0.022, 0.523        | 0.0327  | -0.057                      | -0.064, -0.049      |         | 0.957                                             | 0.947, 0.967        |         | -0.025                          | -0.034, -0.016      |         | 0.686                   | 0.275, 1.097        | 0.0011  | 4.351                   | 3.081, 5.622        |         | -0.094                  | -0.117, -0.070      |         | -0.050                             | -0.062, -0.038      |         |
| Cumulative Stroke Admissions         | 41.812                      | 33.057, 50.567      |         | -0.348                      | -0.674, -0.021      | 0.0371  | 0.609                                             | 0.407, 0.911        | 0.0157  | -0.289                          | -0.669, 0.091       | 0.01363 | 21.900                  | 1.154, 44.954       | 0.0626  | 81.094                  | 10.554, 151.634     | 0.0242  | -1.985                  | 3.271, -0.698       | 0.0025  | -0.452                             | 1.135, 0.231        | 0.1949  |
| Cumulative Other Medical Admissions  | 3.892                       | 3.265, 4.518        |         | -0.093                      | -0.113, -0.074      |         | 0.905                                             | 0.882, 0.929        |         | -0.058                          | -0.081, -0.035      |         | 2.423                   | 1.551, 3.295        | 0.0000  | 7.376                   | 4.674, 10.078       |         | -0.188                  | -0.238, -0.139      |         | -0.065                             | -0.091, -0.039      |         |
| Time in years                        | 5.150                       | 5.055, 5.244        |         | 0.013                       | 0.010, 0.016        |         | 1.055                                             | 1.049, 1.061        |         | -0.014                          | -0.017, -0.010      |         | -0.236                  | -0.454, -0.019      | 0.0333  | -0.430                  | -0.972, 0.111       | 0.1191  | 0.039                   | 0.028, 0.050        |         | 0.022                              | 0.016, 0.028        |         |
| Baseline age                         | 2.572                       | 2.021, 3.123        |         | 0.157                       | 0.140, 0.174        |         | 1.114                                             | 1.088, 1.140        |         | 0.040                           | 0.021, 0.060        |         | -7.452                  | -8.861, -6.043      |         | -21.294                 | -25.674, -16.915    |         | 0.090                   | 0.010, 0.170        | 0.0280  | 0.077                              | 0.035, 0.119        | 0.0004  |
| Baseline age <sup>2</sup> normalised | 11.307                      | 6.316, 16.297       |         | -1.388                      | -1.540, -1.235      |         | 0.312                                             | 0.253, 0.384        |         | -0.470                          | -0.646, -0.293      |         | 99.792                  | 86.806, 112.779     |         | 300.895                 | 260.481, 341.309    |         | -3.512                  | 4.253, -2.772       |         | -1.209                             | 1.597, -0.821       |         |
| Sex Female                           | 15.280                      | 14.626, 15.933      |         | -0.171                      | -0.191, -0.151      |         | 0.975                                             | 0.949, 1.003        | 0.0793  | -0.205                          | -0.229, -0.181      |         | -5.330                  | -6.897, -3.763      |         | -0.818                  | -5.666, 4.031       | 0.7410  | 0.122                   | 0.032, 0.211        | 0.0077  | 0.789                              | 0.742, 0.836        |         |
| Deprivation                          | 3.247                       | 3.142, 3.352        |         | -0.073                      | -0.077, -0.070      |         | 0.924                                             | 0.919, 0.928        |         | -0.021                          | -0.025, -0.017      |         | 1.074                   | 0.802, 1.345        |         | 4.616                   | 3.776, 5.457        |         | -0.105                  | -0.121, -0.090      |         | -0.022                             | -0.030, -0.014      |         |
| Education                            |                             |                     |         |                             |                     |         |                                                   |                     |         |                                 |                     |         |                         |                     |         |                         |                     |         |                         |                     |         |                                    |                     |         |
| None of the above                    | 22.607                      | 21.675, 23.540      |         | -2.003                      | -2.033, -1.973      |         | 0.402                                             | 0.387, 0.417        |         | -0.703                          | -0.738, -0.668      |         | 30.579                  | 27.314, 33.843      |         | 188.046                 | 177.772, 198.320    |         | -2.554                  | 2.740, -2.368       |         | -1.812                             | 1.909, -1.715       |         |
| Prefer not to answer                 | 34.267                      | 31.208, 37.327      |         | -2.124                      | -2.224, -2.024      |         | 0.340                                             | 0.304, 0.379        |         | -0.718                          | -0.834, -0.601      |         | 37.126                  | 24.624, 49.628      |         | 223.092                 | 183.810, 262.374    |         | -2.441                  | 3.150, -1.733       |         | -2.256                             | 2.621, -1.891       |         |
| Secondary <12 years                  | 8.178                       | 7.453, 8.903        |         | -0.993                      | -1.015, -0.971      |         | 0.757                                             | 0.734, 0.781        |         | -0.240                          | -0.266, -0.214      |         | 8.391                   | 6.579, 10.203       |         | 60.486                  | 54.926, 66.047      |         | -0.947                  | -1.050, -0.844      |         | -0.905                             | 0.959, -0.850       |         |
| Secondary ≥12 years                  | 3.368                       | 2.196, 4.540        |         | -0.163                      | -0.198, -0.127      |         | 1.080                                             | 1.023, 1.139        | 0.0055  | 0.032                           | -0.012, 0.075       | 0.1528  | 0.311                   | -2.382, 3.004       | 0.8210  | 17.119                  | 8.910, 25.329       |         | -0.193                  | -0.345, -0.041      | 0.0130  | -0.233                             | -0.313, -0.152      |         |

Association between surgical admissions, cognition, and neurodegeneration in older people: UK Biobank population-based study – Supplementary Material

| Characteristic                                                | Reaction time, milliseconds |                     |         | Fluid intelligence, correct |                     |         | Prospective memory, correct-first-time (logistic) |                     |         | Numeric memory, maximum correct |                     |         | TMTA, deciseconds       |                     |         | TMTB, deciseconds       |                     |         | SDST, matches           |                     |         | Paired associate learning, matches |                     |         |
|---------------------------------------------------------------|-----------------------------|---------------------|---------|-----------------------------|---------------------|---------|---------------------------------------------------|---------------------|---------|---------------------------------|---------------------|---------|-------------------------|---------------------|---------|-------------------------|---------------------|---------|-------------------------|---------------------|---------|------------------------------------|---------------------|---------|
|                                                               | Mean change per surgery     | 95% CI <sup>1</sup> | p-value | Mean change per surgery     | 95% CI <sup>1</sup> | p-value | OR <sup>1</sup>                                   | 95% CI <sup>1</sup> | p-value | Mean change per surgery         | 95% CI <sup>1</sup> | p-value | Mean change per surgery | 95% CI <sup>1</sup> | p-value | Mean change per surgery | 95% CI <sup>1</sup> | p-value | Mean change per surgery | 95% CI <sup>1</sup> | p-value | Mean change per surgery            | 95% CI <sup>1</sup> | p-value |
| BMI                                                           | -1.542                      | -1.988, -1.096      |         | -0.031                      | 0.045, -0.017       |         | 0.984                                             | 0.965, 1.003        | 0.0943  | -0.035                          | 0.051, -0.018       |         | -1.641                  | 2.836, -0.446       | 0.7140  | 2.171                   | 1.498, 5.840        | 0.2461  | 0.039                   | 0.029, 0.107        | 0.2626  | -0.114                             | -0.150, -0.078      |         |
| BMI <sup>2</sup> norm                                         | 20.768                      | 13.427, 28.109      |         | 0.503                       | 0.279, 0.727        |         | 1.440                                             | 1.051, 1.973        | 0.0232  | 0.397                           | 0.128, 0.667        | 0.0038  | 25.206                  | 4.851, 45.560       | 0.0152  | 35.021                  | 97.440, 27.399      | 0.2715  | -1.412                  | 2.569, -0.256       | 0.0167  | 1.401                              | 0.793, 2.010        |         |
| Ever smoked                                                   | -3.901                      | 4.535, -3.268       |         | 0.157                       | 0.137, 0.176        |         | 1.228                                             | 1.195, 1.261        |         | 0.093                           | 0.070, 0.116        |         | 0.454                   | 1.077, 1.984        | 0.5610  | -3.610                  | 8.343, 1.122        | 0.1349  | -0.027                  | 0.114, 0.061        | 0.5489  | 0.123                              | 0.078, 0.169        |         |
| Ever depression                                               | 7.641                       | 6.9108, 8.371       |         | 0.059                       | 0.040, 0.077        |         | 1.135                                             | 1.106, 1.165        |         | 0.034                           | 0.012, 0.057        | 0.0027  | 0.484                   | 1.015, 1.982        | 0.5270  | -1.316                  | 5.925, 3.293        | 0.5756  | -0.113                  | 0.198, -0.028       | 0.0093  | 0.187                              | 0.142, 0.231        |         |
| Average weekly alcohol units scaled                           | -4.589                      | 4.904, -4.273       |         | 0.137                       | 0.127, 0.146        |         | 1.139                                             | 1.122, 1.155        |         | 0.054                           | 0.043, 0.065        |         | -1.682                  | 2.444, -0.919       |         | -3.457                  | 5.792, -1.122       | 0.0037  | 0.127                   | 0.084, 0.170        |         | 0.097                              | 0.075, 0.120        |         |
| IPAQ physical activity                                        |                             |                     |         |                             |                     |         |                                                   |                     |         |                                 |                     |         |                         |                     |         |                         |                     |         |                         |                     |         |                                    |                     |         |
| Moderate                                                      | 2.930                       | 2.161, 3.699        |         | 0.306                       | 0.283, 0.330        |         | 1.139                                             | 1.102, 1.177        |         | 0.131                           | 0.104, 0.159        |         | -4.827                  | 6.608, -3.047       |         | 19.489                  | 25.003, 13.976      |         | 0.383                   | 0.281, 0.484        |         | 0.164                              | 0.111, 0.218        |         |
| Low                                                           | 3.601                       | 2.621, 4.582        |         | 0.325                       | 0.294, 0.355        |         | 1.145                                             | 1.097, 1.196        |         | 0.164                           | 0.128, 0.201        |         | -6.359                  | 8.643, -4.075       |         | 32.084                  | 39.144, 25.024      |         | 0.557                   | 0.426, 0.687        |         | 0.207                              | 0.139, 0.276        |         |
| Missing                                                       | 6.745                       | 5.880, 7.609        |         | -0.140                      | 0.167, -0.113       |         | 0.815                                             | 0.787, 0.845        |         | -0.066                          | 0.098, -0.035       |         | 1.152                   | 1.105, 3.409        |         | 2.239                   | 4.767, 9.245        | 0.5311  | -0.246                  | 0.375, -0.117       | 0.0002  | -0.166                             | 0.234, -0.099       |         |
| Hypertension                                                  | 3.933                       | 3.196, 4.669        |         | -0.097                      | 0.119, -0.074       |         | 0.922                                             | 0.894, 0.951        |         | -0.035                          | 0.063, -0.008       | 0.0102  | 3.341                   | 1.571, 5.111        |         | 10.601                  | 5.110, 16.091       | 0.0002  | -0.286                  | 0.387, -0.185       |         | -0.109                             | 0.162, -0.056       | 0.0001  |
| Diabetes                                                      | 11.930                      | 10.386, 13.474      |         | -0.191                      | 0.237, -0.144       |         | 0.812                                             | 0.766, 0.861        |         | -0.115                          | 0.174, -0.057       | 0.0001  | 13.794                  | 9.806, 17.781       |         | 33.989                  | 21.537, 46.440      |         | -0.812                  | 1.039, -0.585       |         | -0.188                             | 0.308, -0.069       | 0.0019  |
| Solid tumour                                                  | -2.306                      | 3.425, -1.187       |         | 0.133                       | 0.098, 0.167        |         | 1.180                                             | 1.125, 1.237        |         | 0.078                           | 0.036, 0.119        | 0.0002  | -1.743                  | 4.062, 0.576        |         | -6.189                  | 13.381, 1.004       | 0.0917  | 0.045                   | 0.088, 0.177        | 0.5083  | 0.048                              | 0.021, 0.117        | 0.1756  |
| Cumulative Surgeries *<br>Cumulative Other Medical Admissions | -0.234                      | 0.357, -0.111       |         | 0.009                       | 0.005, 0.012        |         | 1.012                                             | 1.007, 1.017        |         | 0.008                           | 0.004, 0.012        | 0.0004  |                         |                     |         |                         |                     |         |                         |                     |         |                                    |                     |         |
| Time in years *<br>Deprivation                                | -0.119                      | 0.145, -0.092       |         | 0.001                       | 0.000, 0.002        | 0.0150  | 1.003                                             | 1.001, 1.005        | 0.0008  |                                 |                     |         |                         |                     |         |                         |                     |         |                         |                     |         |                                    |                     |         |

| Characteristic | Reaction time, milliseconds |                     |         | Fluid intelligence, correct |                     |         | Prospective memory, correct-first-time (logistic) |                     |         | Numeric memory, maximum correct |                     |         | TMTA, deciseconds       |                     |         | TMTB, deciseconds       |                     |         | SDST, matches           |                     |         | Paired associate learning, matches |                     |         |
|----------------|-----------------------------|---------------------|---------|-----------------------------|---------------------|---------|---------------------------------------------------|---------------------|---------|---------------------------------|---------------------|---------|-------------------------|---------------------|---------|-------------------------|---------------------|---------|-------------------------|---------------------|---------|------------------------------------|---------------------|---------|
|                | Mean change per surgery     | 95% CI <sup>1</sup> | p-value | Mean change per surgery     | 95% CI <sup>1</sup> | p-value | OR <sup>1</sup>                                   | 95% CI <sup>1</sup> | p-value | Mean change per surgery         | 95% CI <sup>1</sup> | p-value | Mean change per surgery | 95% CI <sup>1</sup> | p-value | Mean change per surgery | 95% CI <sup>1</sup> | p-value | Mean change per surgery | 95% CI <sup>1</sup> | p-value | Mean change per surgery            | 95% CI <sup>1</sup> | p-value |
| No. Obs.       | 544,520                     |                     |         | 182,490                     |                     |         | 189,725                                           |                     |         | 54,211                          |                     |         | 50,374                  |                     |         | 49,128                  |                     |         | 50,393                  |                     |         | 50,968                             |                     |         |
| Log-likelihood | -3,324,271                  |                     |         | -376,926                    |                     |         | -93,180                                           |                     |         | -89,571                         |                     |         | -293,634                |                     |         | -339,940                |                     |         | -148,648                |                     |         | -118,009                           |                     |         |
| AIC            | 6,648,598                   |                     |         | 753,909                     |                     |         | 186,414                                           |                     |         | 179,197                         |                     |         | 587,321                 |                     |         | 679,933                 |                     |         | 297,348                 |                     |         | 236,070                            |                     |         |
| BIC            | 6,648,912                   |                     |         | 754,192                     |                     |         | 186,688                                           |                     |         | 179,437                         |                     |         | 587,550                 |                     |         | 680,162                 |                     |         | 297,577                 |                     |         | 236,300                            |                     |         |
| Residual df    | 544,492                     |                     |         | 182,462                     |                     |         | 189,698                                           |                     |         | 54,184                          |                     |         | 50,348                  |                     |         | 49,102                  |                     |         | 50,367                  |                     |         | 50,942                             |                     |         |

<sup>1</sup>CI = Confidence Interval; OR = Odds Ratio; TMTA = trail making test A; TMTB = trail making test B; SDST = symbol digit substitution. All available data were used across instances 0, 2, 3. All p<0.0001 unless indicated.

<sup>2</sup>All models were linear mixed effects models of all available data. Foundation models were minimally adjusted. cognitive outcome ~ surgeries + age + age<sup>2</sup> normalised/1000 + time + female sex + (1|participant).

<sup>3</sup>Fully adjusted models were cognitive outcome ~ surgeries + cumulative stroke admissions + cumulative other medical admissions + age + age<sup>2</sup> normalised + time\*deprivation + female sex + education + body mass index + body mass index<sup>2</sup> normalised + smoking + depression + alcohol consumption + physical activity + hypertension + diabetes + solid tumour + (1|participant). Quadratic terms normalised by variable<sup>2</sup> / 1000. Interaction for surgeries\*other medical admissions and time\*deprivation included in reaction time, fluid intelligence and prospective memory fully adjusted models. Linear smoothing uses the formula,  $y \sim x + I(x^2)$ . Cumulative surgical procedures calculated from 8 years prior to baseline (instance 0).

Foundation models. cognitive outcomes ~ brain imaging variables

Table 9. Foundation models cognitive outcomes ~ volume of white matter hyperintensities

| Characteristic                          | Reaction time, milliseconds      |                     |         | Fluid intelligence, correct      |                      |         | Prospective memory, correct-first-time (logistic) |                     |         | Numeric memory, maximum correct  |                      |         | TMTA, deciseconds                |                     |         | TMTB, deciseconds                |                     |         | SDST, matches                    |                     |         | Paired associate learning, matches |                      |         |
|-----------------------------------------|----------------------------------|---------------------|---------|----------------------------------|----------------------|---------|---------------------------------------------------|---------------------|---------|----------------------------------|----------------------|---------|----------------------------------|---------------------|---------|----------------------------------|---------------------|---------|----------------------------------|---------------------|---------|------------------------------------|----------------------|---------|
|                                         | Mean change per cubic millimetre | 95% CI <sup>1</sup> | p-value | Mean change per cubic millimetre | 95% CI <sup>1</sup>  | p-value | OR <sup>1</sup>                                   | 95% CI <sup>1</sup> | p-value | Mean change per cubic millimetre | 95% CI <sup>1</sup>  | p-value | Mean change per cubic millimetre | 95% CI <sup>1</sup> | p-value | Mean change per cubic millimetre | 95% CI <sup>1</sup> | p-value | Mean change per cubic millimetre | 95% CI <sup>1</sup> | p-value | Mean change per cubic millimetre   | 95% CI <sup>1</sup>  | p-value |
| Volume of white matter hyperintensities | 0.0008                           | 0.0006, 0.0009      |         | -1.11e-05                        | -1.42e-05, -8.06e-06 |         | 1                                                 | 1, 1                |         | -8.73e-06                        | -1.12e-05, -6.24e-06 |         | 0.0003                           | 0.0002, 0.0005      |         | 0.0013                           | 0.0009, 0.0017      |         | -4.82e-07                        | -6.44e-07, -3.2e-07 |         | -1.67e-05                          | -2.08e-05, -1.26e-05 |         |
| Baseline age                            | 3.022                            | 1.135, 4.909        | 0.0017  | 0.217                            | 0.180, 0.254         |         | 1.180                                             | 1.126, 1.238        |         | 0.102                            | 0.071, 0.133         |         | -6.799                           | -8.514, -5.085      |         | 8.014                            | -13.402, -2.625     | 0.0036  | 0.006                            | 0.004, 0.008        |         | 0.114                              | 0.062, 0.165         |         |
| Baseline age <sup>2</sup> norm          | 9.851                            | -7.524, 27.226      | 0.2665  | -2.173                           | -2.513, -1.832       |         | 0.152                                             | 0.099, 0.234        |         | -1.172                           | -1.457, -0.887       |         | 91.968                           | 76.148, 107.788     |         | 155.760                          | 106.072, 205.448    |         | 0.071                            | -0.090, -0.053      |         | -1.598                             | -2.077, -1.120       |         |
| Time in years                           | 1.471                            | 0.522, 2.419        | 0.0024  | 0.017                            | 0.000, 0.034         | 0.0437  | 1.069                                             | 1.035, 1.105        | 0.0001  | -0.009                           | -0.025, 0.007        | 0.2824  | -1.157                           | -2.066, -0.248      | 0.0126  | -4.318                           | -7.020, -1.617      | 0.0017  | -                                | -0.001, 0.001       | 0.9183  | 0.042                              | 0.018, 0.067         | 0.0008  |
| Sex Female                              | 23.199                           | 21.213, 25.185      |         | -0.299                           | -0.338, -0.260       |         | 0.996                                             | 0.947, 1.048        | 0.8799  | -0.233                           | -0.266, -0.200       |         | -4.969                           | -6.782, -3.157      |         | -5.595                           | -11.292, -0.102     | 0.0543  | -0.007                           | -0.009, -0.004      |         | 0.763                              | 0.709, 0.818         |         |
| No. Obs.                                | 46,246                           |                     |         | 45,745                           |                      |         | 46,577                                            |                     |         | 37,108                           |                      |         | 36,434                           |                     |         | 36,434                           |                     |         | 36,005                           |                     |         | 36,434                             |                      |         |
| Log-likelihood                          | -280,177                         |                     |         |                                  |                      |         |                                                   |                     |         |                                  |                      |         |                                  |                     |         |                                  |                     |         |                                  |                     |         |                                    |                      |         |
| AIC                                     | 560,370                          |                     |         | 192,752                          |                      |         | 41,076                                            |                     |         | 137,734                          |                      |         | 427,864                          |                     |         | 510,056                          |                     |         | -63,891                          |                     |         | 170,825                            |                      |         |
| BIC                                     | 560,440                          |                     |         | 192,822                          |                      |         | 41,137                                            |                     |         | 137,802                          |                      |         | 427,932                          |                     |         | 510,124                          |                     |         | -63,823                          |                     |         | 170,893                            |                      |         |
| Residual df                             | 46,238                           |                     |         | 45,737                           |                      |         | 46,570                                            |                     |         | 37,100                           |                      |         | 36,426                           |                     |         | 36,426                           |                     |         | 35,997                           |                     |         | 36,426                             |                      |         |

<sup>1</sup>CI = confidence interval; OR = odds ratio; TMTA = trail making test A; TMTB = trail making test B; SDST = symbol digit substitution. All p<0.0001 unless indicated.

<sup>2</sup>All available raw data were used across instances 0, 2, 3. Total volume of white matter hyperintensities were generated from T1 and T2 FLAIR brain images. Hippocampal left/right volumes were generated from subcortical (FIRST) T1 structural brain images. All minimally adjusted linear mixed effects models were adjusted for cognitive outcome ~ imaging variable + baseline age + baseline age<sup>2</sup> normalized + time + female sex + (1|participant). Quadratic terms normalized by variable<sup>2</sup> / 1000. All fully adjusted linear mixed effects models adjusted for cognitive outcome ~ imaging variable(s) + cumulative stroke admissions + cumulative other medical admissions + baseline age + baseline age<sup>2</sup> normalized + time + female sex + deprivation + education + body mass index (BMI) + normalized BMI<sup>2</sup> + smoking + depression + alcohol consumption + physical activity + hypertension + diabetes + solid tumour + (1|participant). Quadratic terms normalized by variable<sup>2</sup> / 1000. Interaction terms were not justified/not used in imaging models.



**Table 10. Foundation models cognitive outcomes ~ volume of average hippocampus**

| Characteristic                       | Reaction time, milliseconds      |                     |         | Fluid intelligence, correct      |                     |         | Prospective memory, correct-first-time (logistic) |                     |         | Numeric memory, maximum correct  |                     |         | TMTA, deciseconds                |                     |         | TMTB, deciseconds                |                     |         | SDST, matches                    |                     |         | Paired associate learning, matches |                     |         |
|--------------------------------------|----------------------------------|---------------------|---------|----------------------------------|---------------------|---------|---------------------------------------------------|---------------------|---------|----------------------------------|---------------------|---------|----------------------------------|---------------------|---------|----------------------------------|---------------------|---------|----------------------------------|---------------------|---------|------------------------------------|---------------------|---------|
|                                      | Mean change per cubic millimetre | 95% CI <sup>1</sup> | p-value | Mean change per cubic millimetre | 95% CI <sup>1</sup> | p-value | OR <sup>1</sup>                                   | 95% CI <sup>1</sup> | p-value | Mean change per cubic millimetre | 95% CI <sup>1</sup> | p-value | Mean change per cubic millimetre | 95% CI <sup>1</sup> | p-value | Mean change per cubic millimetre | 95% CI <sup>1</sup> | p-value | Mean change per cubic millimetre | 95% CI <sup>1</sup> | p-value | Mean change per cubic millimetre   | 95% CI <sup>1</sup> | p-value |
| vol hippocampus avg                  | -0.017                           | -0.019, -0.014      |         | 0.0005                           | 0.0005, 0.0006      |         | 1                                                 | 1, 1                |         | 0.0003                           | 0.0002, 0.0003      |         | -0.011                           | -0.014, -0.009      |         | -0.032                           | -0.039, -0.025      |         | 7.95e-06                         | 5.41e-06, 1.05e-05  |         | 0.0003                             | 0.0003, 0.0004      |         |
| Baseline age                         | 3.620                            | 1.766, 5.474        | 0.0001  | 0.197                            | 0.161, 0.234        |         | 1.174                                             | 1.119, 1.231        |         | 0.094                            | 0.063, 0.125        |         | -6.581                           | -8.284, -4.878      |         | -7.593                           | -12.966, -2.220     | 0.0056  | 0.006                            | 0.004, 0.008        |         | 0.110                              | 0.058, 0.161        |         |
| Baseline age <sup>2</sup> normalized | 3.550                            | -13.515, 20.615     | 0.6834  | -1.939                           | -2.273, -1.605      |         | 0.163                                             | 0.106, 0.250        |         | -1.084                           | -1.367, -0.801      |         | 88.906                           | 73.205, 104.607     |         | 150.207                          | 100.678, 199.736    |         | -0.070                           | -0.088, -0.051      |         | -1.559                             | -2.034, -1.083      |         |
| Time in years                        | 1.386                            | 0.450, 2.322        | 0.0037  | 0.023                            | 0.007, 0.040        | 0.0051  | 1.072                                             | 1.037, 1.108        |         | -0.006                           | -0.022, 0.010       | 0.4691  | -1.255                           | -2.161, -0.350      | 0.0066  | -4.764                           | -7.465, -2.062      | 0.0005  | 0.000                            | -0.001, 0.001       | 0.8549  | 0.046                              | 0.022, 0.071        | 0.0002  |
| Sex Female                           | 18.963                           | 16.938, 20.988      |         | -0.176                           | -0.215, -0.136      |         | 1.082                                             | 1.027, 1.140        | 0.0030  | -0.170                           | -0.204, -0.137      |         | -7.819                           | -9.683, -5.955      |         | -14.096                          | -19.979, -8.214     |         | -0.004                           | -0.007, -0.002      | 0.0001  | 0.850                              | 0.793, 0.906        |         |
| No. Obs.                             | 47,556                           |                     |         | 47,027                           |                     |         | 46,577                                            |                     |         | 37,551                           |                     |         | 36,822                           |                     |         | 36,822                           |                     |         | 36,387                           |                     |         | 36,822                             |                     |         |
| AIC                                  | 576,127                          |                     |         | 197,908                          |                     |         | 41,011                                            |                     |         | 139,266                          |                     |         | 432,326                          |                     |         | 515,706                          |                     |         | -64,478                          |                     |         | 172,670                            |                     |         |
| BIC                                  | 576,197                          |                     |         | 197,978                          |                     |         | 41,072                                            |                     |         | 139,334                          |                     |         | 432,394                          |                     |         | 515,774                          |                     |         | -64,410                          |                     |         | 172,738                            |                     |         |
| Residual df                          | 47,548                           |                     |         | 47,019                           |                     |         | 46,570                                            |                     |         | 37,543                           |                     |         | 36,814                           |                     |         | 36,814                           |                     |         | 36,379                           |                     |         | 36,814                             |                     |         |

<sup>1</sup>CI = confidence interval; OR = odds ratio; TMTA = trail making test A; TMTB = trail making test B; SDST = symbol digit substitution. All p<0.0001 unless indicated.

<sup>2</sup>All available raw data were used across instances 0, 2, 3. Total volume of white matter hyperintensities were generated from T1 and T2 FLAIR brain images. Hippocampal left/right volumes were generated from subcortical (FIRST) T1 structural brain images. All minimally adjusted linear mixed effects models were adjusted for cognitive outcome ~ imaging variable + baseline age + baseline age<sup>2</sup> normalized + time + female sex + (1|participant). Quadratic terms normalized by variable<sup>2</sup> / 1000. All fully adjusted linear mixed effects models adjusted for cognitive outcome ~ imaging variable(s) + cumulative stroke admissions + cumulative other medical admissions + baseline age + baseline age<sup>2</sup> normalized + time + female sex + deprivation + education + body mass index (BMI) + normalized BMI<sup>2</sup> + smoking + depression + alcohol consumption + physical activity + hypertension + diabetes + solid tumour + (1|participant). Quadratic terms normalized by variable<sup>2</sup> / 1000. Interaction terms were not justified/not used in imaging models.

Fully adjusted models. cognitive outcomes ~ brain imaging primary outcomes

Table 11· Fully adjusted models. cognitive outcomes ~ white matter hyperintensities

| Characteristic                          | Reaction time, milliseconds      |                     |         | Fluid intelligence, correct      |                      |         | Prospective memory, correct-first-time (logistic) |                     |         | Numeric memory, maximum correct  |                      |         | TMTA, deciseconds                |                     |         | TMTB, deciseconds                |                     |         | SDST, matches                    |                     |         | Paired associate learning, matches |                      |         |
|-----------------------------------------|----------------------------------|---------------------|---------|----------------------------------|----------------------|---------|---------------------------------------------------|---------------------|---------|----------------------------------|----------------------|---------|----------------------------------|---------------------|---------|----------------------------------|---------------------|---------|----------------------------------|---------------------|---------|------------------------------------|----------------------|---------|
|                                         | Mean change per cubic millimetre | 95% CI <sup>1</sup> | p-value | Mean change per cubic millimetre | 95% CI <sup>1</sup>  | p-value | OR <sup>1</sup>                                   | 95% CI <sup>1</sup> | p-value | Mean change per cubic millimetre | 95% CI <sup>1</sup>  | p-value | Mean change per cubic millimetre | 95% CI <sup>1</sup> | p-value | Mean change per cubic millimetre | 95% CI <sup>1</sup> | p-value | Mean change per cubic millimetre | 95% CI <sup>1</sup> | p-value | Mean change per cubic millimetre   | 95% CI <sup>1</sup>  | p-value |
| Volume of white matter hyperintensities | 0.0007                           | 0.0006, 0.0009      |         | -8.16e-06                        | -1.11e-05, -5.18e-06 |         | 1                                                 | 1, 1                |         | -6.16e-06                        | -8.68e-06, -3.63e-06 |         | 0.0003                           | 0.0001, 0.0004      |         | 0.0012                           | 0.0007, 0.0016      |         | -3.53e-07                        | -5.2e-07, -1.85e-07 |         | -1.15e-05                          | -1.56e-05, -7.36e-06 |         |
| Cumulative Stroke Admissions            | -1.401                           | -37.700, -34.899    | 0.9397  | -1.086                           | -1.750, -0.422       | 0.0014  | 0.445                                             | 0.205, 0.966        | 0.0406  | -0.285                           | -0.860, 0.291        | 0.3320  | 1.758                            | 30.557, 34.074      | 0.9151  | 82.166                           | 16.293, 180.625     | 0.1019  | -0.018                           | -0.056, 0.019       | 0.3351  | -0.319                             | -1.246, 0.607        | 0.4997  |
| Cumulative Other Medical Admissions     | 2.475                            | 1.315, 3.635        | 0.0000  | -0.106                           | 0.128, -0.085        | 0.0000  | 0.903                                             | 0.879, 0.927        | 0.0000  | -0.027                           | -0.046, 0.009        | 0.0038  | 2.593                            | 1.553, 3.634        | 0.0000  | 8.488                            | 5.275, 11.702       | 0.0000  | -0.003                           | 0.004, -0.002       | 0.0000  | -0.089                             | -0.120, -0.059       | 0.0000  |
| Baseline age                            | 3.602                            | 1.694, 5.511        | 0.0002  | 0.171                            | 0.136, 0.207         | 0.0000  | 1.163                                             | 1.108, 1.222        | 0.0000  | 0.084                            | 0.053, 0.115         | 0.0000  | -6.104                           | 7.850, -4.359       | 0.0000  | -5.819                           | 11.215, -0.424      | 0.0345  | 0.006                            | 0.003, 0.008        | 0.0000  | 0.086                              | 0.035, 0.138         | 0.0010  |
| Baseline age <sup>2</sup> normalised    | 3.330                            | -14.257, 20.916     | 0.7106  | -1.667                           | -1.993, -1.341       | 0.0000  | 0.182                                             | 0.117, 0.284        | 0.0000  | -0.972                           | -1.258, -0.686       | 0.0000  | 84.110                           | 67.997, 100.224     | 0.0000  | 130.505                          | 80.720, 180.290     | 0.0000  | -0.063                           | 0.082, -0.044       | 0.0000  | -1.288                             | -1.761, -0.815       | 0.0000  |
| Time in years                           | 1.530                            | 0.578, 2.481        | 0.0016  | 0.023                            | 0.006, 0.040         | 0.0065  | 1.062                                             | 1.028, 1.099        | 0.0004  | -0.007                           | -0.023, 0.009        | 0.3781  | -1.284                           | 2.198, -0.369       | 0.0060  | -4.493                           | 7.186, -1.799       | 0.0011  | 0.000                            | 0.001, 0.001        | 0.8081  | 0.042                              | 0.018, 0.067         | 0.0007  |
| Sex Female                              | 22.648                           | 20.526, 24.771      | 0.0000  | -0.264                           | 0.304, -0.225        | 0.0000  | 1.008                                             | 0.954, 1.065        | 0.7790  | -0.214                           | -0.249, 0.179        | 0.0000  | -5.400                           | 7.349, -3.451       | 0.0000  | -5.328                           | 11.354, 0.697       | 0.0830  | -0.007                           | 0.009, -0.004       | 0.0000  | 0.750                              | 0.693, 0.808         | 0.0000  |
| Deprivation                             | 1.169                            | 0.797, 1.540        | 0.0000  | -0.028                           | -0.035, 0.021        | 0.0000  | 0.967                                             | 0.958, 0.976        | 0.0000  | -0.012                           | -0.018, 0.006        | 0.0001  | 0.831                            | 0.493, 1.169        | 0.0000  | 3.376                            | 2.330, 4.421        | 0.0000  | -0.001                           | -0.001, 0.000       | 0.0109  | -0.021                             | -0.031, -0.011       | 0.0000  |
| Education                               | NA                               |                     | NA      | NA                               |                      | NA      | NA                                                |                     | NA      |                                  | NA                   | NA      | NA                               |                     | NA      |                                  | NA                  | NA      |                                  | NA                  | NA      |                                    | NA                   | NA      |
| Prefer not to answer                    | 23.724                           | 5.506, 41.941       | 0.0107  | 0.093                            | 0.249, 0.434         | 0.5939  | 1.005                                             | 0.684, 1.478        | 0.9790  | 0.171                            | -0.130, 0.473        | 0.2652  | -4.029                           | 21.081, 13.022      | 0.6432  | -38.960                          | 91.125, 13.205      | 0.1432  | 0.002                            | 0.018, 0.022        | 0.8544  | -0.590                             | -1.082, -0.098       | 0.0188  |

Association between surgical admissions, cognition, and neurodegeneration in older people: UK Biobank population-based study – Supplementary Material

| Characteristic                            | Reaction time, milliseconds      |                     |         | Fluid intelligence, correct      |                     |         | Prospective memory, correct-first-time (logistic) |                     |         | Numeric memory, maximum correct  |                     |         | TMTA, deciseconds                |                     |         | TMTB, deciseconds                |                     |         | SDST, matches                    |                     |         | Paired associate learning, matches |                     |         |
|-------------------------------------------|----------------------------------|---------------------|---------|----------------------------------|---------------------|---------|---------------------------------------------------|---------------------|---------|----------------------------------|---------------------|---------|----------------------------------|---------------------|---------|----------------------------------|---------------------|---------|----------------------------------|---------------------|---------|------------------------------------|---------------------|---------|
|                                           | Mean change per cubic millimetre | 95% CI <sup>1</sup> | p-value | Mean change per cubic millimetre | 95% CI <sup>1</sup> | p-value | OR <sup>1</sup>                                   | 95% CI <sup>1</sup> | p-value | Mean change per cubic millimetre | 95% CI <sup>1</sup> | p-value | Mean change per cubic millimetre | 95% CI <sup>1</sup> | p-value | Mean change per cubic millimetre | 95% CI <sup>1</sup> | p-value | Mean change per cubic millimetre | 95% CI <sup>1</sup> | p-value | Mean change per cubic millimetre   | 95% CI <sup>1</sup> | p-value |
| Secondary <12 years                       | -9.979                           | -14.592, -5.365     | 0.0000  | 0.962                            | 0.875, 1.048        | 0.0000  | 1.696                                             | 1.535, 1.874        | 0.0000  | 0.499                            | 0.422, 0.576        | 0.0000  | -20.669                          | -25.040, -16.298    | 0.0000  | -83.773                          | -97.201, -70.344    | 0.0000  | 0.025                            | 0.020, 0.030        | 0.0000  | 0.828                              | 0.701, 0.955        | 0.0000  |
| Secondary 12 years                        | -15.635                          | -21.029, -10.241    | 0.0000  | 1.732                            | 1.632, 1.833        | 0.0000  | 2.606                                             | 2.284, 2.973        | 0.0000  | 0.867                            | 0.778, 0.957        | 0.0000  | -29.584                          | -34.651, -24.518    | 0.0000  | -120.435                         | -136.001, -104.869  | 0.0000  | 0.033                            | 0.027, 0.039        | 0.0000  | 1.546                              | 1.399, 1.693        | 0.0000  |
| Tertiary >12 years                        | -21.723                          | -26.075, -17.370    | 0.0000  | 2.039                            | 1.957, 2.120        | 0.0000  | 2.363                                             | 2.153, 2.595        | 0.0000  | 0.827                            | 0.754, 0.899        | 0.0000  | -28.669                          | -32.787, -24.552    | 0.0000  | -135.043                         | -147.700, -122.386  | 0.0000  | 0.035                            | 0.030, 0.039        | 0.0000  | 1.746                              | 1.626, 1.866        | 0.0000  |
| BMI                                       | 0.701                            | -1.043, 2.445       | 0.4306  | -0.050                           | -0.082, 0.018       | 0.0023  | 0.965                                             | 0.920, 1.011        | 0.1351  | -0.038                           | -0.067, 0.009       | 0.0108  | -0.798                           | -2.429, 0.833       | 0.3377  | 3.394                            | 1.634, 8.421        | 0.1858  | -0.000                           | -0.002, 0.001       | 0.6564  | -0.122                             | -0.169, 0.074       | 0.0000  |
| BMI <sup>2</sup> norm                     | -12.655                          | -42.668, 17.358     | 0.4085  | 0.695                            | 0.141, 1.249        | 0.0139  | 1.797                                             | 0.793, 4.073        | 0.1601  | 0.370                            | -0.130, 0.869       | 0.1472  | 9.992                            | 18.178, 38.163      | 0.4869  | -46.336                          | 133.146, 40.474     | 0.2955  | -0.004                           | -0.036, 0.029       | 0.8350  | 1.522                              | 0.699, 2.345        | 0.0003  |
| Ever smoked                               | -0.580                           | -2.647, 1.487       | 0.5823  | 0.039                            | 0.000, 0.077        | 0.0476  | 1.045                                             | 0.990, 1.103        | 0.1096  | 0.053                            | 0.019, 0.087        | 0.0021  | 0.292                            | 1.603, 2.187        | 0.7629  | -0.448                           | 6.304, 5.409        | 0.8809  | 0.000                            | -0.002, 0.003       | 0.7700  | 0.134                              | 0.078, 0.189        | 0.0000  |
| Ever depression                           | -1.725                           | -3.745, 0.294       | 0.0940  | 0.035                            | 0.002, 0.073        | 0.0628  | 1.148                                             | 1.089, 1.210        | 0.0000  | -0.006                           | -0.039, 0.027       | 0.7355  | 1.243                            | 0.621, 3.106        | 0.1911  | 1.148                            | 4.598, 6.894        | 0.6953  | 0.000                            | 0.002, 0.002        | 0.9230  | 0.157                              | 0.103, 0.212        | 0.0000  |
| average total weekly units alcohol scaled | -0.705                           | -1.081, 0.330       | 0.0002  | 0.033                            | 0.026, 0.039        | 0.0000  | 1.011                                             | 1.001, 1.022        | 0.0303  | 0.028                            | 0.022, 0.034        | 0.0000  | -0.463                           | -0.812, 0.113       | 0.0094  | -1.251                           | 2.326, 0.176        | 0.0225  | 0.001                            | 0.000, 0.001        | 0.0026  | 0.034                              | 0.023, 0.044        | 0.0000  |
| IPAQ physical activity                    | NA                               |                     | NA      | NA                               |                     | NA      | NA                                                |                     | NA      | NA                               | NA                  | NA      | NA                               |                     | NA      | NA                               |                     | NA      | NA                               | NA                  | NA      | NA                                 |                     | NA      |
| Low                                       | 0.307                            | -2.781, 3.394       | 0.8456  | 0.394                            | 0.336, 0.451        | 0.0000  | 1.256                                             | 1.155, 1.365        | 0.0000  | 0.200                            | 0.150, 0.251        | 0.0000  | -6.926                           | 9.772, 4.080        | 0.0000  | -26.135                          | 34.936, 17.334      | 0.0000  | 0.004                            | 0.001, 0.008        | 0.0112  | 0.243                              | 0.159, 0.326        | 0.0000  |
| Missing                                   | 3.697                            | 0.669, 6.724        | 0.0167  | -0.001                           | -0.057, 0.055       | 0.9739  | 0.918                                             | 0.852, 0.989        | 0.0245  | -0.041                           | -0.090, 0.009       | 0.1095  | -4.707                           | 7.497, 1.917        | 0.0009  | -11.922                          | 20.547, 3.297       | 0.0067  | -0.003                           | -0.006, 0.000       | 0.0784  | -0.115                             | -0.197, 0.033       | 0.0058  |

Association between surgical admissions, cognition, and neurodegeneration in older people: UK Biobank population-based study – Supplementary Material

| Characteristic | Reaction time, milliseconds      |                     |         | Fluid intelligence, correct      |                     |         | Prospective memory, correct-first-time (logistic) |                     |         | Numeric memory, maximum correct  |                     |         | TMTA, deciseconds                |                     |         | TMTB, deciseconds                |                     |         | SDST, matches                    |                     |         | Paired associate learning, matches |                     |         |
|----------------|----------------------------------|---------------------|---------|----------------------------------|---------------------|---------|---------------------------------------------------|---------------------|---------|----------------------------------|---------------------|---------|----------------------------------|---------------------|---------|----------------------------------|---------------------|---------|----------------------------------|---------------------|---------|------------------------------------|---------------------|---------|
|                | Mean change per cubic millimetre | 95% CI <sup>1</sup> | p-value | Mean change per cubic millimetre | 95% CI <sup>1</sup> | p-value | OR <sup>1</sup>                                   | 95% CI <sup>1</sup> | p-value | Mean change per cubic millimetre | 95% CI <sup>1</sup> | p-value | Mean change per cubic millimetre | 95% CI <sup>1</sup> | p-value | Mean change per cubic millimetre | 95% CI <sup>1</sup> | p-value | Mean change per cubic millimetre | 95% CI <sup>1</sup> | p-value | Mean change per cubic millimetre   | 95% CI <sup>1</sup> | p-value |
| Moderate       | 1.710                            | -0.700, 4.121       | 0.1643  | 0.301                            | 0.257, 0.346        | 0.0000  | 1.122                                             | 1.053, 1.194        | 0.0003  | 0.127                            | 0.087, 0.166        | 0.0000  | -5.918                           | 8.124, -3.712       | 0.0000  | -13.764                          | 20.587, -6.942      | 0.0001  | 0.004                            | 0.001, 0.007        | 0.0021  | 0.195                              | 0.130, 0.260        | 0.0000  |
| Hypertension   | 1.001                            | -1.406, 3.409       | 0.4148  | -0.046                           | 0.091, -0.001       | 0.0439  | 1.029                                             | 0.968, 1.094        | 0.3581  | -0.047                           | 0.087, -0.008       | 0.0188  | 1.404                            | 0.819, 3.627        | 0.2158  | 2.288                            | 4.581, 9.158        | 0.5138  | -0.003                           | 0.006, -0.001       | 0.0164  | -0.079                             | 0.144, -0.014       | 0.0173  |
| Diabetes       | 9.993                            | 4.621, 15.366       | 0.0003  | -0.096                           | 0.196, 0.004        | 0.0591  | 0.901                                             | 0.791, 1.025        | 0.1122  | -0.183                           | 0.272, -0.094       | 0.0001  | 10.963                           | 5.964, 15.963       | 0.0000  | 14.713                           | 0.746, 30.172       | 0.0621  | -0.012                           | 0.018, -0.006       | 0.0001  | -0.267                             | 0.414, -0.120       | 0.0004  |
| Solid tumour   | -0.829                           | -3.960, 2.301       | 0.6036  | 0.009                            | 0.049, 0.067        | 0.7646  | 1.043                                             | 0.964, 1.128        | 0.2997  | -0.008                           | 0.059, 0.043        | 0.7492  | -0.694                           | -3.546, 2.158       | 0.6334  | -2.038                           | 10.856, 6.780       | 0.6505  | -0.002                           | 0.005, 0.001        | 0.2205  | -0.011                             | 0.095, 0.073        | 0.7920  |
| No. Obs.       | 44,854                           |                     |         | 44,367                           |                     |         | 45,180                                            |                     |         | 35,731                           |                     |         | 35,061                           |                     |         | 35,061                           |                     |         | 34,644                           |                     |         | 35,061                             |                     |         |
| AIC            | 542,887                          |                     |         | 182,212                          |                     |         | 38,931                                            |                     |         | 131,560                          |                     |         | 411,413                          |                     |         | 489,429                          |                     |         | -61,380                          |                     |         | 162,446                            |                     |         |
| BIC            | 543,113                          |                     |         | 182,438                          |                     |         | 39,149                                            |                     |         | 131,781                          |                     |         | 411,634                          |                     |         | 489,649                          |                     |         | -61,160                          |                     |         | 162,666                            |                     |         |
| Residual df    | 44,828                           |                     |         | 44,341                           |                     |         | 45,155                                            |                     |         | 35,705                           |                     |         | 35,035                           |                     |         | 35,035                           |                     |         | 34,618                           |                     |         | 35,035                             |                     |         |

<sup>1</sup>CI = confidence interval; OR = odds ratio; TMTA = trail making test A; TMTB = trail making test B; SDST = symbol digit substitution. All p<0.0001 unless indicated.

<sup>2</sup>All available raw data were used across instances 0, 2, 3. Total volume of white matter hyperintensities were generated from T1 and T2 FLAIR brain images. Hippocampal left/right volumes were generated from subcortical (FIRST) T1 structural brain images. All minimally adjusted linear mixed effects models were adjusted for cognitive outcome ~ imaging variable + baseline age + baseline age<sup>2</sup> normalized + time + female sex + (1|participant). Quadratic terms normalized by variable<sup>2</sup> / 1000. All fully adjusted linear mixed effects models adjusted for cognitive outcome ~ imaging variable(s) + cumulative stroke admissions + cumulative other medical admissions + baseline age + baseline age<sup>2</sup> normalized + time + female sex + deprivation + education + body mass index (BMI) + normalized BMI<sup>2</sup> + smoking + depression + alcohol consumption + physical activity + hypertension + diabetes + solid tumour + (1|participant). Quadratic terms normalized by variable<sup>2</sup> / 1000. Interaction terms were not justified/not used in imaging models.

Table 12- Fully adjusted models cognitive outcomes ~ average volume of hippocampus

| Characteristic                       | Reaction time, milliseconds      |                     |         | Fluid intelligence, correct      |                     |         | Prospective memory, correct-first-time (logistic) |                     |         | Numeric memory, maximum correct  |                     |         | TMTA, deciseconds                |                     |         | TMTB, deciseconds                |                     |         | SDST, matches                    |                     |         | Paired associate learning, matches |                     |         |
|--------------------------------------|----------------------------------|---------------------|---------|----------------------------------|---------------------|---------|---------------------------------------------------|---------------------|---------|----------------------------------|---------------------|---------|----------------------------------|---------------------|---------|----------------------------------|---------------------|---------|----------------------------------|---------------------|---------|------------------------------------|---------------------|---------|
|                                      | Mean change per cubic millimetre | 95% CI <sup>1</sup> | p-value | Mean change per cubic millimetre | 95% CI <sup>1</sup> | p-value | OR <sup>1</sup>                                   | 95% CI <sup>1</sup> | p-value | Mean change per cubic millimetre | 95% CI <sup>1</sup> | p-value | Mean change per cubic millimetre | 95% CI <sup>1</sup> | p-value | Mean change per cubic millimetre | 95% CI <sup>1</sup> | p-value | Mean change per cubic millimetre | 95% CI <sup>1</sup> | p-value | Mean change per cubic millimetre   | 95% CI <sup>1</sup> | p-value |
| Volume average hippocampus           | -0.015                           | -0.017, -0.012      |         | 0.0004                           | 0.000364, 0.000452  |         | 1.00                                              | 1, 1                |         | 0.0002                           | 0.00017, 0.000249   |         | -0.009                           | -0.012, -0.008      |         | -0.025                           | -0.032, -0.018      |         | 6.25e-06                         | 3.67e-06, 8.84e-06  |         | 0.0002                             | 0.0002, 0.0003      |         |
| Cumulative Stroke Admissions         | -1.476                           | -36.634, 33.682     | 0.9344  | -1.030                           | -1.674, -0.387      | 0.0017  | 0.424                                             | 0.196, 0.915        | 0.0287  | -0.271                           | -0.845, 0.304       | 0.3556  | 1.539                            | 30.731, 33.809      | 0.9255  | 84.256                           | 14.474, 182.985     | 0.0944  | -0.019                           | -0.056, 0.019       | 0.3262  | -0.337                             | -1.264, 0.589       | 0.4755  |
| Cumulative Other Medical Admissions  | 2.477                            | 1.336, 3.618        | 0.0000  | -0.103                           | -0.125, -0.082      | 0.0000  | 0.903                                             | 0.879, 0.927        | 0.0000  | -0.031                           | -0.050, -0.013      | 0.0008  | 2.519                            | 1.487, 3.551        | 0.0000  | 8.153                            | 4.952, 11.355       | 0.0000  | -0.003                           | -0.004, -0.002      | 0.0000  | -0.087                             | -0.117, -0.057      | 0.0000  |
| Baseline age                         | 4.101                            | 2.225, 5.977        | 0.0000  | 0.156                            | 0.121, 0.191        | 0.0000  | 1.158                                             | 1.103, 1.216        | 0.0000  | 0.076                            | 0.046, 0.107        | 0.0000  | -5.970                           | -7.704, -4.237      | 0.0000  | -5.357                           | -10.739, -0.024     | 0.0510  | 0.005                            | 0.003, 0.007        | 0.0000  | 0.086                              | 0.035, 0.137        | 0.0010  |
| Baseline age <sup>2</sup> normalised | -1.904                           | -19.180, 15.372     | 0.8290  | -1.485                           | -1.805, -1.164      | 0.0000  | 0.191                                             | 0.123, 0.299        | 0.0000  | -0.889                           | -1.174, -0.605      | 0.0000  | 81.982                           | 65.985, 97.978      | 0.0000  | 124.955                          | 75.320, 174.590     | 0.0000  | -0.061                           | -0.080, -0.042      | 0.0000  | -1.279                             | -1.749, -0.809      | 0.0000  |
| Time in years                        | 1.473                            | 0.533, 2.412        | 0.0021  | 0.027                            | 0.011, 0.044        | 0.0011  | 1.064                                             | 1.029, 1.100        | 0.0003  | -0.005                           | -0.021, 0.011       | 0.5607  | -1.363                           | -2.274, -0.451      | 0.0034  | -4.847                           | -7.540, -2.154      | 0.0004  | 0.000                            | 0.001, 0.001        | 0.7592  | 0.045                              | 0.021, 0.070        | 0.0003  |
| Sex Female                           | 18.756                           | 16.594, 20.918      | 0.0000  | -0.165                           | -0.205, -0.125      | 0.0000  | 1.083                                             | 1.023, 1.146        | 0.0059  | -0.164                           | -0.200, -0.129      | 0.0000  | -7.906                           | -9.909, -5.903      | 0.0000  | -12.221                          | -18.440, -6.003     | 0.0001  | -0.005                           | -0.007, -0.003      | 0.0000  | 0.810                              | 0.751, 0.869        | 0.0000  |
| Deprivation                          | 1.100                            | 0.734, 1.465        | 0.0000  | -0.026                           | -0.033, -0.020      | 0.0000  | 0.968                                             | 0.959, 0.977        | 0.0000  | -0.012                           | -0.018, -0.006      | 0.0001  | 0.795                            | 0.459, 1.131        | 0.0000  | 3.402                            | 2.359, 4.445        | 0.0000  | -0.001                           | -0.001, 0.000       | 0.0127  | -0.020                             | -0.030, -0.010      | 0.0001  |
| Education                            | NA                               |                     | NA      | NA                               |                     | NA      | NA                                                |                     | NA      |                                  | NA                  | NA      | NA                               |                     | NA      |                                  | NA                  | NA      |                                  | NA                  |         | NA                                 |                     | NA      |
| Prefer not to answer                 | 19.589                           | 2.106, 37.072       | 0.0281  | 0.081                            | -0.247, 0.408       | 0.6285  | 0.989                                             | 0.672, 1.455        | 0.9546  | 0.112                            | -0.181, 0.405       | 0.4529  | -6.230                           | -22.804, 10.344     | 0.4613  | -52.015                          | -102.934, -1.097    | 0.0453  | -0.004                           | -0.023, 0.016       | 0.7186  | -0.568                             | -1.047, -0.089      | 0.0201  |

Association between surgical admissions, cognition, and neurodegeneration in older people: UK Biobank population-based study – Supplementary Material

| Characteristic                            | Reaction time, milliseconds      |                     |         | Fluid intelligence, correct      |                     |         | Prospective memory, correct-first-time (logistic) |                     |         | Numeric memory, maximum correct  |                     |         | TMTA, deciseconds                |                     |         | TMTB, deciseconds                |                     |         | SDST, matches                    |                     |         | Paired associate learning, matches |                     |         |
|-------------------------------------------|----------------------------------|---------------------|---------|----------------------------------|---------------------|---------|---------------------------------------------------|---------------------|---------|----------------------------------|---------------------|---------|----------------------------------|---------------------|---------|----------------------------------|---------------------|---------|----------------------------------|---------------------|---------|------------------------------------|---------------------|---------|
|                                           | Mean change per cubic millimetre | 95% CI <sup>1</sup> | p-value | Mean change per cubic millimetre | 95% CI <sup>1</sup> | p-value | OR <sup>1</sup>                                   | 95% CI <sup>1</sup> | p-value | Mean change per cubic millimetre | 95% CI <sup>1</sup> | p-value | Mean change per cubic millimetre | 95% CI <sup>1</sup> | p-value | Mean change per cubic millimetre | 95% CI <sup>1</sup> | p-value | Mean change per cubic millimetre | 95% CI <sup>1</sup> | p-value | Mean change per cubic millimetre   | 95% CI <sup>1</sup> | p-value |
| Secondary <12 years                       | -9.839                           | -14.383, -5.295     | 0.0000  | 0.954                            | 0.869, 1.039        | 0.0000  | 1.680                                             | 1.520, 1.856        | 0.0000  | 0.497                            | 0.420, 0.574        | 0.0000  | -20.018                          | -24.359, -15.677    | 0.0000  | -86.553                          | -99.946, -73.160    | 0.0000  | 0.025                            | 0.020, 0.030        | 0.0000  | 0.850                              | 0.723, 0.976        | 0.0000  |
| Secondary 12 years                        | -15.522                          | -20.835, -10.208    | 0.0000  | 1.716                            | 1.617, 1.815        | 0.0000  | 2.558                                             | 2.242, 2.918        | 0.0000  | 0.861                            | 0.771, 0.950        | 0.0000  | -28.802                          | -33.836, -23.768    | 0.0000  | -122.564                         | -138.095, -107.034  | 0.0000  | 0.033                            | 0.027, 0.039        | 0.0000  | 1.553                              | 1.407, 1.700        | 0.0000  |
| Tertiary >12 years                        | -20.916                          | -25.207, -16.626    | 0.0000  | 2.012                            | 1.931, 2.092        | 0.0000  | 2.307                                             | 2.101, 2.533        | 0.0000  | 0.813                            | 0.741, 0.886        | 0.0000  | -27.693                          | -31.785, -23.601    | 0.0000  | -136.895                         | -149.525, -124.264  | 0.0000  | 0.034                            | 0.029, 0.039        | 0.0000  | 1.751                              | 1.632, 1.870        | 0.0000  |
| BMI                                       | 0.846                            | 0.829, 2.521        | 0.3222  | -0.057                           | -0.088, -0.026      | 0.0003  | 0.961                                             | 0.917, 1.008        | 0.1030  | -0.051                           | -0.079, -0.023      | 0.0004  | -0.932                           | -2.514, 0.650       | 0.2481  | 3.681                            | 1.222, 8.583        | 0.1412  | -0.001                           | -0.003, 0.001       | 0.2933  | -0.131                             | -0.177, -0.084      | 0.0000  |
| BMI <sup>2</sup> norm                     | -12.929                          | -41.662, 15.804     | 0.3778  | 0.790                            | 0.260, 1.320        | 0.0035  | 1.854                                             | 0.817, 4.205        | 0.1397  | 0.588                            | 0.105, 1.071        | 0.0171  | 13.395                           | 13.831, 40.621      | 0.3349  | -48.281                          | -132.643, 36.081    | 0.2620  | 0.006                            | 0.026, 0.038        | 0.7127  | 1.651                              | 0.853, 2.449        | 0.0001  |
| Ever smoked                               | -0.394                           | 2.430, 1.642        | 0.7046  | 0.039                            | 0.002, 0.077        | 0.0405  | 1.045                                             | 0.990, 1.103        | 0.1100  | 0.053                            | 0.020, 0.087        | 0.0017  | 0.544                            | 1.339, 2.427        | 0.5714  | 0.337                            | 5.507, 6.181        | 0.9100  | 0.000                            | 0.002, 0.003        | 0.7501  | 0.131                              | 0.076, 0.186        | 0.0000  |
| Ever depression                           | -1.381                           | 3.369, 0.607        | 0.1734  | 0.033                            | -0.004, 0.070       | 0.0779  | 1.145                                             | 1.086, 1.207        | 0.0000  | -0.006                           | -0.039, 0.027       | 0.7085  | 1.277                            | 0.575, 3.129        | 0.1765  | 1.535                            | 4.198, 7.268        | 0.5997  | -0.000                           | 0.002, 0.002        | 0.8132  | 0.154                              | 0.100, 0.208        | 0.0000  |
| average total weekly units alcohol scaled | -0.845                           | 1.214, 0.476        | 0.0000  | 0.035                            | 0.028, 0.042        | 0.0000  | 1.012                                             | 1.002, 1.023        | 0.0172  | 0.029                            | 0.023, 0.035        | 0.0000  | -0.509                           | 0.856, 0.162        | 0.0040  | -1.304                           | 2.377, -0.232       | 0.0172  | 0.001                            | 0.000, 0.001        | 0.0028  | 0.035                              | 0.025, 0.045        | 0.0000  |
| IPAQ physical activity                    | NA                               |                     | NA      | NA                               |                     | NA      | NA                                                |                     | NA      | NA                               |                     | NA      |                                  | NA                  | NA      |                                  | NA                  | NA      |                                  | NA                  | NA      |                                    | NA                  | NA      |
| Low                                       | -0.280                           | 3.318, 2.759        | 0.8568  | 0.391                            | 0.334, 0.447        | 0.0000  | 1.260                                             | 1.159, 1.370        | 0.0000  | 0.201                            | 0.151, 0.251        | 0.0000  | -7.143                           | 9.971, 4.315        | 0.0000  | -26.548                          | 35.330, 17.767      | 0.0000  | 0.004                            | 0.001, 0.007        | 0.0141  | 0.248                              | 0.165, 0.331        | 0.0000  |

Association between surgical admissions, cognition, and neurodegeneration in older people: UK Biobank population-based study – Supplementary Material

| Characteristic | Reaction time, milliseconds      |                     |         | Fluid intelligence, correct      |                     |         | Prospective memory, correct-first-time (logistic) |                     |         | Numeric memory, maximum correct  |                     |                   | TMTA, deciseconds                |                     |                 | TMTB, deciseconds                |                     |                  | SDST, matches                    |                     |         | Paired associate learning, matches |                     |         |                |                |                |        |
|----------------|----------------------------------|---------------------|---------|----------------------------------|---------------------|---------|---------------------------------------------------|---------------------|---------|----------------------------------|---------------------|-------------------|----------------------------------|---------------------|-----------------|----------------------------------|---------------------|------------------|----------------------------------|---------------------|---------|------------------------------------|---------------------|---------|----------------|----------------|----------------|--------|
|                | Mean change per cubic millimetre | 95% CI <sup>1</sup> | p-value | Mean change per cubic millimetre | 95% CI <sup>1</sup> | p-value | OR <sup>1</sup>                                   | 95% CI <sup>1</sup> | p-value | Mean change per cubic millimetre | 95% CI <sup>1</sup> | p-value           | Mean change per cubic millimetre | 95% CI <sup>1</sup> | p-value         | Mean change per cubic millimetre | 95% CI <sup>1</sup> | p-value          | Mean change per cubic millimetre | 95% CI <sup>1</sup> | p-value | Mean change per cubic millimetre   | 95% CI <sup>1</sup> | p-value |                |                |                |        |
| Missing        | 3.888                            | 0.907<br>6.869      | 0.0106  | 0.002                            | -0.054,<br>0.057    | 0.9562  | 0.922                                             | 0.856,<br>0.994     | 0.0332  | -                                | 0.037               | -0.086,<br>0.013  | 0.1452                           | -                   | 7.354<br>1.806  | 0.0012                           | -                   | 11.831           | 20.444,<br>3.219                 | 0.0071              | -       | 0.003                              | 0.006,<br>0.000     | 0.0699  | -              | 0.115          | 0.196<br>0.033 | 0.0059 |
| Moderate       | 1.754                            | -<br>0.621<br>4.129 | 0.1478  | 0.305                            | 0.261,<br>0.349     | 0.0000  | 1.125                                             | 1.057,<br>1.198     | 0.0002  | 0.132                            | 0.093,<br>0.171     | 0.0000            | -                                | 6.030               | 8.222<br>3.838  | 0.0000                           | -                   | 14.698           | 21.506,<br>7.890                 | 0.0000              | 0.004   | 0.002,<br>0.007                    | 0.0016              | 0.201   | 0.137<br>0.266 | 0.0000         |                |        |
| Hypertension   | 1.426                            | -<br>0.930<br>3.782 | 0.2355  | -                                | -0.093,<br>-0.006   | 0.0266  | 1.010                                             | 0.951,<br>1.074     | 0.7376  | -                                | 0.053               | -0.092,<br>-0.014 | 0.0075                           | 1.673               | 0.523<br>3.868  | 0.1354                           | 2.889               | 3.925,<br>9.703  | 0.4059                           | -                   | 0.004   | -                                  | 0.007,<br>0.001     | 0.0028  | -              | 0.092          | 0.157<br>0.028 | 0.0051 |
| Diabetes       | 9.585                            | 4.334<br>14.836     | 0.0003  | -                                | -0.164,<br>0.031    | 0.1826  | 0.917                                             | 0.806,<br>1.044     | 0.1897  | -                                | 0.166               | -0.253,<br>-0.078 | 0.0002                           | 11.150              | 6.201<br>16.099 | 0.0000                           | 16.122              | 0.756,<br>31.489 | 0.0398                           | -                   | 0.010   | 0.016,<br>0.005                    | 0.0004              | -       | 0.248          | 0.393<br>0.102 | 0.0009         |        |
| Solid tumour   | -                                | 3.619<br>2.552      | 0.7347  | 0.007                            | -0.050,<br>0.065    | 0.8013  | 1.037                                             | 0.959,<br>1.123     | 0.3622  | -                                | 0.006               | -0.057,<br>0.044  | 0.8132                           | -                   | 3.419<br>2.254  | 0.6874                           | -                   | 9.735,<br>7.877  | 0.8362                           | -                   | 0.002   | 0.006,<br>0.001                    | 0.1982              | -       | 0.017          | 0.100<br>0.067 | 0.6973         |        |
| No. Obs.       | 46,149                           |                     |         | 45,634                           |                     |         | 45,180                                            |                     |         | 36,159                           |                     |                   | 35,435                           |                     |                 | 35,435                           |                     |                  | 35,012                           |                     |         | 35,435                             |                     |         |                |                |                |        |
| AIC            | 558,473                          |                     |         | 187,272                          |                     |         | 38,888                                            |                     |         | 133,046                          |                     |                   | 415,712                          |                     |                 | 494,855                          |                     |                  | -                                | 61,941              |         |                                    | 164,208             |         |                |                |                |        |
| BIC            | 558,700                          |                     |         | 187,499                          |                     |         | 39,106                                            |                     |         | 133,267                          |                     |                   | 415,932                          |                     |                 | 495,076                          |                     |                  | -                                | 61,721              |         |                                    | 164,428             |         |                |                |                |        |
| Residual df    | 46,123                           |                     |         | 45,608                           |                     |         | 45,155                                            |                     |         | 36,133                           |                     |                   | 35,409                           |                     |                 | 35,409                           |                     |                  | 34,986                           |                     |         | 35,409                             |                     |         |                |                |                |        |

<sup>1</sup>CI = confidence interval; OR = odds ratio; TMTA = trail making test A; TMTB = trail making test B; SDST = symbol digit substitution. All p<0.0001 unless indicated.

<sup>2</sup>All available raw data were used across instances 0, 2, 3. Total volume of white matter hyperintensities were generated from T1 and T2 FLAIR brain images. Hippocampal left/right volumes were generated from subcortical (FIRST) T1 structural brain images. All minimally adjusted linear mixed effects models were adjusted for cognitive outcome ~ imaging variable + baseline age + baseline age<sup>2</sup> normalized + time + female sex + (1|participant). Quadratic terms normalized by variable<sup>2</sup> / 1000. All fully adjusted linear mixed effects models adjusted for cognitive outcome ~ imaging variable(s) + cumulative stroke admissions + cumulative other medical admissions + baseline age + baseline age<sup>2</sup> normalized + time + female sex + deprivation + education + body mass index (BMI) + normalized BMI<sup>2</sup> + smoking + depression + alcohol consumption + physical activity + hypertension + diabetes + solid tumour + (1|participant). Quadratic terms normalized by variable<sup>2</sup> / 1000. Interaction terms were not justified/not used in imaging models.

## Foundation models. brain imaging outcomes ~ surgeries variables

**Table 13. Foundation models brain imaging ~ cumulative surgeries**

| Characteristic                       | Volume of total white matter hyperintensities |                      |         | Average hippocampal volume |                     |         |
|--------------------------------------|-----------------------------------------------|----------------------|---------|----------------------------|---------------------|---------|
|                                      | Mean volume                                   | 95% CI <sup>1</sup>  | p-value | Mean volume                | 95% CI <sup>1</sup> | p-value |
| Cumulative Surgeries                 | 175.172                                       | 144.877, 205.466     |         | -8.524                     | -10.425, -6.622     |         |
| Time in years                        | 52.555                                        | 43.118, 61.993       |         | -5.584                     | -6.014, -5.153      |         |
| Baseline age                         | -922.493                                      | -1035.858, -809.127  |         | 56.638                     | 49.412, 63.864      |         |
| Baseline age <sup>2</sup> normalised | 11390.402                                     | 10350.931, 12429.874 |         | -686.486                   | -752.731, -620.242  |         |
| Sex Female                           | -508.869                                      | -628.707, -389.031   |         | 223.409                    | -231.060, -215.758  |         |
| No. Obs.                             | 47,686                                        |                      |         | 49,217                     |                     |         |
| Log-likelihood                       | -482,811                                      |                      |         | -362,154                   |                     |         |
| AIC                                  | 965,638                                       |                      |         | 724,323                    |                     |         |
| BIC                                  | 965,708                                       |                      |         | 724,394                    |                     |         |
| Residual df                          | 47,678                                        |                      |         | 49,209                     |                     |         |

<sup>1</sup>CI = Confidence Interval. All p<0.0001 unless indicated.

Imaging outcomes are in units of cubic millimetres. Total volume of white matter hyperintensities were generated from T1 and T2 FLAIR brain images. Hippocampal left/right volumes were generated from subcortical (FIRST) T1 structural brain images. All available data were used across instances 0, 2, 3. All minimally adjusted linear mixed effects models were brain imaging outcome ~ surgeries variable(s) + age + normalized age<sup>2</sup> + female sex (1|participant). All fully adjusted linear mixed effects models were brain imaging outcome ~ surgeries variable(s) + cumulative stroke admissions + cumulative other medical admissions + baseline age + baseline age<sup>2</sup> normalized + time + female sex + (1|participant). Quadratic terms normalized by variable<sup>2</sup> / 1000. All fully adjusted linear mixed effects models adjusted for cognitive outcome ~ imaging variable(s) + cumulative stroke admissions + cumulative other medical admissions + baseline age + baseline age<sup>2</sup> normalized + time + female sex + deprivation + education + body mass index (BMI) + normalized BMI<sup>2</sup> + smoking + depression + alcohol consumption + physical activity + hypertension + diabetes + solid tumour + (1|participant). Quadratic terms normalized by variable<sup>2</sup> / 1000. Interaction terms were not significant/used in imaging models.



**Table 14. Foundation models brain imaging ~ surgery factored**

| Characteristic                       | Volume of total white matter hyperintensities |                      |         | Average hippocampal volume |                     |         |
|--------------------------------------|-----------------------------------------------|----------------------|---------|----------------------------|---------------------|---------|
|                                      | Mean volume                                   | 95% CI <sup>1</sup>  | p-value | Mean volume                | 95% CI <sup>1</sup> | p-value |
| Cumulative Surgeries factored        |                                               |                      |         |                            |                     |         |
| 1-2                                  | 246.219                                       | 112.378, 380.061     |         | -6.206                     | -14.326, 1.913      | 0.1341  |
| 3-5                                  | 542.223                                       | 378.429, 706.017     |         | -28.674                    | -38.759, -18.588    |         |
| 6+                                   | 1453.631                                      | 1176.119, 1731.143   |         | -58.959                    | -76.010, -41.908    |         |
| Time in years                        | 53.195                                        | 43.759, 62.630       |         | -5.628                     | -6.059, -5.198      |         |
| Baseline age                         | -924.706                                      | -1038.085, -811.326  |         | 56.751                     | 49.525, 63.978      |         |
| Baseline age <sup>2</sup> normalised | 11418.443                                     | 10378.910, 12457.977 |         | -688.025                   | -754.270, -621.779  |         |
| Sex Female                           | -508.485                                      | -628.360, -388.611   |         | -223.541                   | -231.194, -215.888  |         |
| No. Obs.                             | 47,686                                        |                      |         | 49,217                     |                     |         |
| Log-likelihood                       | -482,802                                      |                      |         | -362,152                   |                     |         |
| AIC                                  | 965,624                                       |                      |         | 724,325                    |                     |         |
| BIC                                  | 965,712                                       |                      |         | 724,413                    |                     |         |
| Residual df                          | 47,676                                        |                      |         | 49,207                     |                     |         |

<sup>1</sup>CI = Confidence Interval. All p<0.0001 unless indicated.

Imaging outcomes are in units of cubic millimetres. Total volume of white matter hyperintensities were generated from T1 and T2 FLAIR brain images. Hippocampal left/right volumes were generated from subcortical (FIRST) T1 structural brain images. All available data were used across instances 0, 2, 3. All minimally adjusted linear mixed effects models were: brain imaging outcome ~ surgeries variable(s) + age + normalized age<sup>2</sup> + female sex (1|participant). All fully adjusted linear mixed effects models were: brain imaging outcome ~ surgeries variable(s) + cumulative stroke admissions + cumulative other medical admissions + baseline age + baseline age<sup>2</sup> normalized + time + female sex + (1|participant). Quadratic terms normalized by variable<sup>2</sup> / 1000. All fully adjusted linear mixed effects models adjusted for cognitive outcome ~ imaging variable(s) + cumulative stroke admissions + cumulative other medical admissions + baseline age + baseline age<sup>2</sup> normalized + time + female sex + deprivation + education + body mass index (BMI) + normalized BMI<sup>2</sup> + smoking + depression + alcohol consumption + physical activity + hypertension + diabetes + solid tumour + (1|participant). Quadratic terms normalized by variable<sup>2</sup> / 1000. Interaction terms were not significant/used in imaging models.

**Table 15. Foundation models brain imaging ~ high complexity cumulative surgeries**

| Characteristic                        | Volume of total white matter hyperintensities |                      |         | Average hippocampal volume |                     |         |
|---------------------------------------|-----------------------------------------------|----------------------|---------|----------------------------|---------------------|---------|
|                                       | Mean volume                                   | 95% CI <sup>1</sup>  | p-value | Mean volume                | 95% CI <sup>1</sup> | p-value |
| Cumulative Major+Major++CMO Surgeries | 414.538                                       | 330.815, 498.262     |         | -22.163                    | -27.400, -16.927    |         |
| Time in years                         | 54.607                                        | 45.183, 64.032       |         | -5.672                     | -6.101, -5.243      |         |
| Baseline age                          | -921.803                                      | -1035.215, -808.390  |         | 56.586                     | 49.359, 63.813      |         |
| Baseline age <sup>2</sup> normalised  | 11396.624                                     | 10356.692, 12436.557 |         | -686.403                   | -752.660, -620.147  |         |
| Sex Female                            | -536.675                                      | -656.861, -416.489   |         | -221.843                   | -229.514, -214.172  |         |
| No. Obs.                              | 47,686                                        |                      |         | 49,217                     |                     |         |
| Log-likelihood                        | -482,827                                      |                      |         | -362,157                   |                     |         |
| AIC                                   | 965,670                                       |                      |         | 724,330                    |                     |         |
| BIC                                   | 965,740                                       |                      |         | 724,400                    |                     |         |
| Residual df                           | 47,678                                        |                      |         | 49,209                     |                     |         |

<sup>1</sup>CI = Confidence Interval. All p<0.0001 unless indicated.

Imaging outcomes are in units of cubic millimetres. Total volume of white matter hyperintensities were generated from T1 and T2 FLAIR brain images. Hippocampal left/right volumes were generated from subcortical (FIRST) T1 structural brain images. All available data were used across instances 0, 2, 3. All minimally adjusted linear mixed effects models were brain imaging outcome ~ surgeries variable(s) + age + normalized age<sup>2</sup> + female sex (1|participant). All fully adjusted linear mixed effects models were brain imaging outcome ~ surgeries variable(s) + cumulative stroke admissions + cumulative other medical admissions + baseline age + baseline age<sup>2</sup> normalized + time + female sex + (1|participant). Quadratic terms normalized by variable<sup>2</sup> / 1000. All fully adjusted linear mixed effects models adjusted for cognitive outcome ~ imaging variable(s) + cumulative stroke admissions + cumulative other medical admissions + baseline age + baseline age<sup>2</sup> normalized + time + female sex + deprivation + education + body mass index (BMI) + normalized BMI<sup>2</sup> + smoking + depression + alcohol consumption + physical activity + hypertension + diabetes + solid tumour + (1|participant). Quadratic terms normalized by variable<sup>2</sup> / 1000. Interaction terms were not significant/used in imaging models.

## Fully adjusted models. primary brain imaging outcomes ~ surgeries variables

Table 16. Fully adjusted models. primary brain imaging outcomes ~ cumulative surgeries

| Characteristic                        | Volume of total white matter hyperintensities |                      |         | Average hippocampal volume |                     |         |
|---------------------------------------|-----------------------------------------------|----------------------|---------|----------------------------|---------------------|---------|
|                                       | Mean volume                                   | 95% CI <sup>1</sup>  | p-value | Mean volume                | 95% CI <sup>1</sup> | p-value |
| Cumulative Surgeries                  | 100.022                                       | 66.173, 133.871      |         | -5.763                     | -7.892, -3.635      |         |
| Cumulative Stroke Admissions          | 6271.288                                      | 4320.191, 8222.385   |         | -161.291                   | -277.374, -45.208   | 0.0065  |
| Cumulative Other Medical Admissions   | 148.509                                       | 75.389, 221.629      | 0.0001  | -8.660                     | -13.249, -4.070     | 0.0002  |
| Time in years                         | 53.759                                        | 44.298, 63.220       |         | -5.661                     | -6.095, -5.227      |         |
| Baseline age                          | -943.036                                      | -1055.488, -830.585  |         | 56.207                     | 48.994, 63.420      |         |
| Baseline age <sup>2</sup> normalised  | 11459.545                                     | 10428.027, 12491.062 |         | -679.031                   | -745.180, -612.881  |         |
| Sex Female                            | -248.620                                      | -374.122, -123.119   | 0.0001  | -230.410                   | -238.448, -222.371  |         |
| Deprivation                           | 3.081                                         | -18.859, 25.022      | 0.7831  | -4.024                     | -5.432, -2.616      |         |
| Education                             |                                               |                      |         |                            |                     |         |
| None of the above                     | -65.030                                       | -309.989, 179.930    | 0.6028  | -63.121                    | -78.311, -47.930    |         |
| Prefer not to answer                  | 512.760                                       | -443.607, 1469.127   | 0.2933  | -35.366                    | -91.446, 20.714     | 0.2164  |
| Secondary <12 years                   | -33.432                                       | -172.725, 105.861    | 0.6381  | -42.271                    | -50.844, -33.698    |         |
| Secondary 12 years                    | 212.806                                       | 6.494, 419.117       | 0.0432  | -28.289                    | -40.695, -15.883    |         |
| BMI                                   | -66.647                                       | -168.068, 34.775     | 0.1978  | 12.089                     | 5.887, 18.290       | 0.0001  |
| BMI <sup>2</sup> normalised           | 2729.575                                      | 985.317, 4473.834    | 0.0022  | -197.713                   | -303.993, -91.433   | 0.0003  |
| Ever smoked                           | 153.177                                       | 31.306, 275.048      | 0.0138  | -4.569                     | -12.336, 3.198      | 0.2489  |
| Ever depression                       | -120.204                                      | -237.549, -2.860     | 0.0447  | 14.184                     | 6.874, 21.493       | 0.0001  |
| Average weekly alcohol units (scaled) | 64.299                                        | 5.607, 122.991       | 0.0318  | -10.233                    | -13.810, -6.656     |         |

Association between surgical admissions, cognition, and neurodegeneration in older people: UK Biobank population-based study – Supplementary Material

| Characteristic         | Volume of total white matter hyperintensities |                     |         | Average hippocampal volume |                     |         |
|------------------------|-----------------------------------------------|---------------------|---------|----------------------------|---------------------|---------|
|                        | Mean volume                                   | 95% CI <sup>1</sup> | p-value | Mean volume                | 95% CI <sup>1</sup> | p-value |
| IPAQ physical activity |                                               |                     |         |                            |                     |         |
| Moderate               | 77.386                                        | -65.567, 220.339    | 0.2887  | -7.812                     | -17.002, 1.378      | 0.0957  |
| Low                    | 60.143                                        | -123.355, 243.641   | 0.5206  | -11.354                    | -23.137, 0.429      | 0.0589  |
| Missing                | 233.796                                       | 55.298, 412.294     | 0.0103  | -23.489                    | -34.960, -12.019    | 0.0001  |
| Hypertension           | 1521.798                                      | 1380.399, 1663.198  |         | -21.555                    | -30.618, -12.493    |         |
| Diabetes               | 877.029                                       | 561.274, 1192.784   |         | -91.574                    | -111.677, -71.470   |         |
| Solid tumour           | 16.439                                        | -172.458, 205.336   | 0.8646  | 10.747                     | -1.393, 22.886      | 0.0827  |
| No. Obs.               | 47,686                                        |                     |         | 49,217                     |                     |         |
| Log-likelihood         | -482,225                                      |                     |         | -361,899                   |                     |         |
| AIC                    | 964,501                                       |                     |         | 723,850                    |                     |         |
| BIC                    | 964,729                                       |                     |         | 724,079                    |                     |         |
| Residual df            | 47,660                                        |                     |         | 49,191                     |                     |         |

<sup>1</sup>CI = Confidence Interval. All p<0.0001 unless indicated.

Imaging outcomes are in units of cubic millimetres. Total volume of white matter hyperintensities were generated from T1 and T2 FLAIR brain images. Hippocampal left/right volumes were generated from subcortical (FIRST) T1 structural brain images. All available data were used across instances 0, 2, 3. All minimally adjusted linear mixed effects models were: brain imaging outcome ~ surgeries variable(s) + age + normalized age<sup>2</sup> + female sex (1|participant). All fully adjusted linear mixed effects models were: brain imaging outcome ~ surgeries variable(s) + cumulative stroke admissions + cumulative other medical admissions + baseline age + baseline age<sup>2</sup> normalized + time + female sex + (1|participant). Quadratic terms normalized by variable<sup>2</sup> / 1000. All fully adjusted linear mixed effects models adjusted for cognitive outcome ~ imaging variable(s) + cumulative stroke admissions + cumulative other medical admissions + baseline age + baseline age<sup>2</sup> normalized + time + female sex + deprivation + education + body mass index (BMI) + normalized BMI<sup>2</sup> + smoking + depression + alcohol consumption + physical activity + hypertension + diabetes + solid tumour + (1|participant). Quadratic terms normalized by variable<sup>2</sup> / 1000. Interaction terms were not significant/used in imaging models.

**Table 17. Fully adjusted models. primary brain imaging outcomes ~ surgery factored**

| Characteristic                        | Volume of total white matter hyperintensities |                      |         | Average hippocampal volume |                     |         |
|---------------------------------------|-----------------------------------------------|----------------------|---------|----------------------------|---------------------|---------|
|                                       | Mean volume                                   | 95% CI <sup>1</sup>  | p-value | Mean volume                | 95% CI <sup>1</sup> | p-value |
| Cumulative Surgeries factored         |                                               |                      |         |                            |                     |         |
| 1-2                                   | 145.862                                       | 12.237, 279.487      | 0.0324  | -2.777                     | -10.939, 5.385      | 0.5049  |
| 3-5                                   | 262.272                                       | 92.945, 431.600      | 0.0024  | -19.288                    | -29.766, -8.809     | 0.0003  |
| 6+                                    | 902.681                                       | 604.109, 1201.253    |         | -36.960                    | -55.376, -18.544    | 0.0001  |
| Cumulative Stroke Admissions          | 6263.470                                      | 4312.466, 8214.475   |         | -160.243                   | -276.336, -44.151   | 0.0068  |
| Cumulative Other Medical Admissions   | 155.660                                       | 83.497, 227.823      |         | -9.610                     | -14.134, -5.086     |         |
| Time in years                         | 54.136                                        | 44.676, 63.595       |         | -5.690                     | -6.124, -5.256      |         |
| Baseline age                          | -943.435                                      | -1055.893, -830.978  |         | 56.199                     | 48.985, 63.412      |         |
| Baseline age <sup>2</sup> normalised  | 11467.268                                     | 10435.715, 12498.822 |         | -679.208                   | -745.359, -613.056  |         |
| Sex Female                            | -248.456                                      | -373.979, -122.932   | 0.0001  | -230.510                   | -238.550, -222.470  |         |
| Deprivation                           | 3.521                                         | -18.420, 25.462      | 0.7531  | -4.044                     | -5.452, -2.636      |         |
| Education                             |                                               |                      |         |                            |                     |         |
| None of the above                     | -64.289                                       | -309.227, 180.649    | 0.6069  | -63.528                    | -78.719, -48.338    |         |
| Prefer not to answer                  | 520.179                                       | -436.197, 1476.555   | 0.2864  | -35.693                    | -91.777, 20.392     | 0.2123  |
| Secondary <12 years                   | -32.437                                       | -171.739, 106.866    | 0.6481  | -42.481                    | -51.055, -33.907    |         |
| Secondary 12 years                    | 211.143                                       | 4.833, 417.453       | 0.0449  | -28.265                    | -40.673, -15.858    |         |
| BMI                                   | -66.393                                       | -167.827, 35.041     | 0.1995  | 12.064                     | 5.861, 18.267       | 0.0001  |
| BMI <sup>2</sup> norm                 | 2728.401                                      | 983.996, 4472.806    | 0.0022  | -197.495                   | -303.789, -91.201   | 0.0003  |
| Ever smoked                           | 155.599                                       | 33.727, 277.471      | 0.0123  | -4.716                     | -12.483, 3.051      | 0.2340  |
| Ever depression                       | -119.630                                      | -236.984, -2.276     | 0.0457  | 14.062                     | 6.751, 21.372       | 0.0002  |
| Average weekly alcohol units (scaled) | 63.847                                        | 5.153, 122.540       | 0.0330  | -10.192                    | -13.770, -6.615     |         |

Association between surgical admissions, cognition, and neurodegeneration in older people: UK Biobank population-based study – Supplementary Material

| Characteristic         | Volume of total white matter hyperintensities |                     |         | Average hippocampal volume |                     |         |
|------------------------|-----------------------------------------------|---------------------|---------|----------------------------|---------------------|---------|
|                        | Mean volume                                   | 95% CI <sup>1</sup> | p-value | Mean volume                | 95% CI <sup>1</sup> | p-value |
| IPAQ physical activity |                                               |                     |         |                            |                     |         |
| Moderate               | 76.407                                        | -66.545, 219.359    | 0.2948  | -7.688                     | -16.878, 1.503      | 0.1011  |
| Low                    | 59.910                                        | -123.596, 243.416   | 0.5222  | -11.293                    | -23.077, 0.490      | 0.0603  |
| Missing                | 235.557                                       | 57.049, 414.064     | 0.0097  | -23.506                    | -34.978, -12.035    | 0.0001  |
| Hypertension           | 1525.066                                      | 1383.662, 1666.469  |         | -21.693                    | -30.756, -12.630    |         |
| Diabetes               | 878.026                                       | 562.260, 1193.791   |         | -91.784                    | -111.888, -71.680   |         |
| Solid tumour           | 29.064                                        | -159.307, 217.436   | 0.7623  | 9.534                      | -2.571, 21.639      | 0.1227  |
| No. Obs.               | 47,686                                        |                     |         | 49,217                     |                     |         |
| Log-likelihood         | -482,211                                      |                     |         | -361,894                   |                     |         |
| AIC                    | 964,478                                       |                     |         | 723,845                    |                     |         |
| BIC                    | 964,723                                       |                     |         | 724,091                    |                     |         |
| Residual df            | 47,658                                        |                     |         | 49,189                     |                     |         |

<sup>1</sup>CI = Confidence Interval. All p<0.0001 unless indicated.

Imaging outcomes are in units of cubic millimetres. Total volume of white matter hyperintensities were generated from T1 and T2 FLAIR brain images. Hippocampal left/right volumes were generated from subcortical (FIRST) T1 structural brain images. All available data were used across instances 0, 2, 3. All minimally adjusted linear mixed effects models were brain imaging outcome ~ surgeries variable(s) + age + normalized age<sup>2</sup> + female sex (1|participant). All fully adjusted linear mixed effects models were brain imaging outcome ~ surgeries variable(s) + cumulative stroke admissions + cumulative other medical admissions + baseline age + baseline age<sup>2</sup> normalized + time + female sex + (1|participant). Quadratic terms normalized by variable<sup>2</sup> / 1000. All fully adjusted linear mixed effects models adjusted for cognitive outcome ~ imaging variable(s) + cumulative stroke admissions + cumulative other medical admissions + baseline age + baseline age<sup>2</sup> normalized + time + female sex + deprivation + education + body mass index (BMI) + normalized BMI<sup>2</sup> + smoking + depression + alcohol consumption + physical activity + hypertension + diabetes + solid tumour + (1|participant). Quadratic terms normalized by variable<sup>2</sup> / 1000. Interaction terms were not significant/used in imaging models.

**Table 18. Fully adjusted models. primary brain imaging outcomes ~ high complexity cumulative surgeries**

| Characteristic                        | Volume of total white matter hyperintensities |                      |         | Average hippocampal volume |                     |         |
|---------------------------------------|-----------------------------------------------|----------------------|---------|----------------------------|---------------------|---------|
|                                       | Mean volume                                   | 95% CI <sup>1</sup>  | p-value | Mean volume                | 95% CI <sup>1</sup> | p-value |
| Cumulative Major+Major++CMO Surgeries | 247.728                                       | 161.696, 333.760     |         | -17.047                    | -22.456, -11.639    |         |
| Cumulative Stroke Admissions          | 6275.433                                      | 4324.255, 8226.610   |         | -162.270                   | -278.341, -46.199   | 0.0061  |
| Cumulative Other Medical Admissions   | 191.533                                       | 122.771, 260.295     |         | -10.618                    | -14.943, -6.294     |         |
| Time in years                         | 54.549                                        | 45.100, 63.998       |         | -5.693                     | -6.125, -5.260      |         |
| Baseline age                          | -938.123                                      | -1050.580, -825.666  |         | 55.917                     | 48.705, 63.130      |         |
| Baseline age <sup>2</sup> normalised  | 11413.837                                     | 10382.136, 12445.537 |         | -676.082                   | -742.235, -609.928  |         |
| Sex Female                            | -268.782                                      | -394.601, -142.963   |         | -228.969                   | -237.026, -220.912  |         |
| Deprivation                           | 3.158                                         | -18.782, 25.099      | 0.7778  | -4.016                     | -5.423, -2.608      |         |
| Education                             |                                               |                      |         |                            |                     |         |
| None of the above                     | -39.272                                       | -283.956, 205.411    | 0.7531  | -64.384                    | -79.559, -49.210    |         |
| Prefer not to answer                  | 550.994                                       | -405.309, 1507.296   | 0.2588  | -37.170                    | -93.237, 18.896     | 0.1938  |
| Secondary <12 years                   | -21.884                                       | -161.056, 117.287    | 0.7579  | -42.837                    | -51.402, -34.273    |         |
| Secondary 12 years                    | 217.526                                       | 11.211, 423.840      | 0.0388  | -28.624                    | -41.028, -16.219    |         |
| BMI                                   | -68.473                                       | -169.902, 32.956     | 0.1858  | 12.250                     | 6.049, 18.452       | 0.0001  |
| BMI2 norm                             | 2757.292                                      | 1012.988, 4501.597   | 0.0019  | -199.965                   | -306.236, -93.693   | 0.0002  |
| Ever smoked                           | 157.897                                       | 36.045, 279.749      | 0.0111  | -4.807                     | -12.572, 2.958      | 0.2250  |
| Ever depression                       | -113.053                                      | -230.333, 4.228      | 0.0589  | 13.848                     | 6.543, 21.153       | 0.0002  |
| Average weekly alcohol units (scaled) | 62.441                                        | 3.764, 121.118       | 0.0370  | -10.176                    | -13.751, -6.600     |         |
| IPAQ physical activity                |                                               |                      |         |                            |                     |         |
| Moderate                              | 71.663                                        | -71.269, 214.596     | 0.3258  | -7.479                     | -16.667, 1.709      | 0.1106  |

Association between surgical admissions, cognition, and neurodegeneration in older people: UK Biobank population-based study – Supplementary Material

| Characteristic | Volume of total white matter hyperintensities |                     |         | Average hippocampal volume |                     |         |
|----------------|-----------------------------------------------|---------------------|---------|----------------------------|---------------------|---------|
|                | Mean volume                                   | 95% CI <sup>1</sup> | p-value | Mean volume                | 95% CI <sup>1</sup> | p-value |
| Low            | 55.519                                        | -127.976, 239.014   | 0.5532  | -11.058                    | -22.839, 0.724      | 0.0658  |
| Missing        | 234.088                                       | 55.591, 412.585     | 0.0102  | -23.442                    | -34.911, -11.972    | 0.0001  |
| Hypertension   | 1524.418                                      | 1383.041, 1665.794  |         | -21.619                    | -30.679, -12.559    |         |
| Diabetes       | 875.978                                       | 560.220, 1191.736   |         | -91.402                    | -111.504, -71.300   |         |
| Solid tumour   | 68.574                                        | -117.626, 254.775   | 0.4704  | 8.420                      | -3.552, 20.392      | 0.1681  |
| No. Obs.       | 47,686                                        |                     |         | 49,217                     |                     |         |
| Log-likelihood | -482,225                                      |                     |         | -361,893                   |                     |         |
| AIC            | 964,501                                       |                     |         | 723,839                    |                     |         |
| BIC            | 964,729                                       |                     |         | 724,067                    |                     |         |
| Residual df    | 47,660                                        |                     |         | 49,191                     |                     |         |

<sup>1</sup>CI = Confidence Interval. All p<0.0001 unless indicated.

Imaging outcomes are in units of cubic millimetres. Total volume of white matter hyperintensities were generated from T1 and T2 FLAIR brain images. Hippocampal left/right volumes were generated from subcortical (FIRST) T1 structural brain images. All available data were used across instances 0, 2, 3. All minimally adjusted linear mixed effects models were: brain imaging outcome ~ surgeries variable(s) + age + normalized age<sup>2</sup> + female sex (1|participant). All fully adjusted linear mixed effects models were: brain imaging outcome ~ surgeries variable(s) + cumulative stroke admissions + cumulative other medical admissions + baseline age + baseline age<sup>2</sup> normalized + time + female sex + (1|participant). Quadratic terms normalized by variable<sup>2</sup> / 1000. All fully adjusted linear mixed effects models adjusted for cognitive outcome ~ imaging variable(s) + cumulative stroke admissions + cumulative other medical admissions + baseline age + baseline age<sup>2</sup> normalized + time + female sex + deprivation + education + body mass index (BMI) + normalized BMI<sup>2</sup> + smoking + depression + alcohol consumption + physical activity + hypertension + diabetes + solid tumour + (1|participant). Quadratic terms normalized by variable<sup>2</sup> / 1000. Interaction terms were not significant/used in imaging models.



**Table 19. Models. secondary (DKT) brain imaging outcomes ~ cumulative surgeries**

| Dependent variable                                    | Foundation           |                |                |               |                                      |                |                |               | Fully adjusted       |                       |                |               |                                      |                       |                |               |
|-------------------------------------------------------|----------------------|----------------|----------------|---------------|--------------------------------------|----------------|----------------|---------------|----------------------|-----------------------|----------------|---------------|--------------------------------------|-----------------------|----------------|---------------|
|                                                       | Cumulative surgeries |                |                |               | Cumulative high complexity surgeries |                |                |               | Cumulative surgeries |                       |                |               | Cumulative high complexity surgeries |                       |                |               |
|                                                       | Mean volume /surgery | 95% CI         | Type 3 p-value | p-value (FDR) | Mean volume /surgery                 | 95% CI         | Type 3 p-value | p-value (FDR) | Mean volume /surgery | 95% CI                | Type 3 p-value | p-value (FDR) | Mean volume surgery                  | 95% CI                | Type 3 p-value | p-value (FDR) |
| 1. Average mean thickness caudal anterior cingulate   | -0.0017              | -0.003, -0.001 | 0.0038         | 0.0061        | -0.0047                              | -0.008, -0.002 | 0.0035         | 0.0090        | -0.0008              | -0.002, 0.000         | 0.2060         | 0.4090        | -0.0034                              | -0.007, -0.000        | 0.0461         | 0.1590        |
| 2. Average mean thickness caudal middle frontal       | -0.0005              | -0.001, 0.000  | 0.1370         | 0.1610        | -0.0004                              | -0.002, 0.001  | 0.6570         | 0.7270        | 0.0002               | -0.001, 0.001         | 0.5320         | 0.7850        | 0.0004                               | -0.001, 0.002         | 0.6670         | 0.9600        |
| 3. Average mean thickness cuneus                      | 0.0011               | 0.000, 0.002   | 0.0004         | 0.0008        | 0.0013                               | -0.000, 0.003  | 0.1310         | 0.1850        | 0.0007               | 0.000, 0.001          | 0.0391         | 0.1730        | -0.0004                              | -0.002, 0.001         | 0.6810         | 0.9600        |
| 4. Average mean thickness entorhinal                  | -0.0026              | -0.004, -0.001 | 0.0001         | 0.0002        | -0.0083                              | -0.012, -0.005 |                |               | -0.0013              | -0.003, 0.000         | 0.0907         | 0.2010        | <b>-0.0055</b>                       | <b>-0.009, -0.002</b> | <b>0.0042</b>  | <b>0.0365</b> |
| 5. Average mean thickness fusiform                    | -0.0014              | -0.002, -0.001 | 0.0000         |               | -0.0041                              | -0.006, -0.002 |                |               | -0.0006              | -0.001, 0.000         | 0.0636         | 0.1970        | <b>-0.0027</b>                       | <b>-0.004, -0.001</b> | <b>0.0017</b>  | <b>0.0268</b> |
| 6. Average mean thickness inferior parietal           | -0.0005              | -0.001, 0.000  | 0.0624         | 0.0806        | -0.0011                              | -0.003, 0.000  | 0.1680         | 0.2260        | -0.0002              | -0.001, 0.000         | 0.4920         | 0.7630        | -0.0008                              | -0.002, 0.001         | 0.3050         | 0.5910        |
| 7. Average mean thickness inferior temporal           | -0.0012              | -0.002, -0.001 |                | 0.0001        | -0.0035                              | -0.005, -0.002 |                | 0.0001        | -0.0006              | -0.001, 0.000         | 0.0567         | 0.1970        | <b>-0.0023</b>                       | <b>-0.004, -0.001</b> | <b>0.0059</b>  | <b>0.0368</b> |
| 8. Average mean thickness insula                      | -0.0031              | -0.004, -0.002 |                |               | -0.0057                              | -0.008, -0.004 |                |               | <b>-0.0012</b>       | <b>-0.002, -0.000</b> | <b>0.0028</b>  | <b>0.0431</b> | <b>-0.0021</b>                       | <b>-0.004, -0.000</b> | <b>0.0425</b>  | <b>0.1590</b> |
| 9. Average mean thickness isthmus cingulate           | -0.0010              | -0.002, -0.000 | 0.0086         | 0.0134        | -0.0020                              | -0.004, -0.000 | 0.0480         | 0.0930        | -0.0008              | -0.002, 0.000         | 0.0778         | 0.2010        | -0.0016                              | -0.004, 0.001         | 0.1410         | 0.3640        |
| 10. Average mean thickness lateral occipital          | 0.0006               | 0.000, 0.001   | 0.0302         | 0.0407        | 0.0003                               | -0.001, 0.002  | 0.7390         | 0.7900        | 0.0002               | -0.000, 0.001         | 0.5830         | 0.7970        | -0.0013                              | -0.003, 0.000         | 0.1070         | 0.3020        |
| 11. Average mean thickness lateral orbitofrontal      | -0.0008              | -0.001, -0.000 | 0.0122         | 0.0180        | -0.0016                              | -0.003, 0.000  | 0.0552         | 0.1010        | -0.0001              | -0.001, 0.001         | 0.8260         | 0.9080        | -0.0003                              | -0.002, 0.001         | 0.7260         | 0.9780        |
| 12. Average mean thickness lingual                    | 0.0013               | 0.001, 0.002   |                | 0.0001        | 0.0010                               | -0.001, 0.003  | 0.2280         | 0.2950        | 0.001                | 0.000, 0.002          | 0.0061         | 0.0625        | -0.0004                              | -0.002, 0.001         | 0.6270         | 0.9600        |
| 13. Average mean thickness medial orbito frontal      | -0.0019              | -0.003, -0.001 |                |               | -0.0041                              | -0.006, -0.002 |                | 0.0001        | -0.001               | -0.002, -0.000        | 0.0142         | 0.0801        | -0.002                               | -0.004, 0.000         | 0.0566         | 0.1750        |
| 14. Average mean thickness middle temporal            | -0.0015              | -0.002, -0.001 |                |               | -0.0042                              | -0.006, -0.003 |                |               | -0.0008              | -0.002, -0.000        | 0.0155         | 0.0801        | <b>-0.0029</b>                       | <b>-0.005, -0.001</b> | <b>0.0009</b>  | <b>0.0268</b> |
| 15. Average mean thickness paracentral                | -0.0015              | -0.002, -0.001 | 0.0003         | 0.0007        | -0.0025                              | -0.005, -0.000 | 0.0323         | 0.0668        | -0.0001              | -0.001, 0.001         | 0.7900         | 0.9070        | -0.0001                              | -0.003, 0.002         | 0.9200         | 0.9780        |
| 16. Average mean thickness parahippocampal            | -0.0028              | -0.004, -0.002 |                |               | -0.0078                              | -0.011, -0.005 |                |               | -0.0012              | -0.003, 0.000         | 0.0593         | 0.1970        | <b>-0.0047</b>                       | <b>-0.008, -0.001</b> | <b>0.0047</b>  | <b>0.0365</b> |
| 17. Average mean thickness parsopercularis            | -0.0010              | -0.002, -0.000 | 0.0012         | 0.0022        | -0.0013                              | -0.003, 0.000  | 0.1300         | 0.1850        | -0.0001              | -0.001, 0.001         | 0.7160         | 0.8540        | 0                                    | -0.002, 0.002         | 0.9630         | 0.9780        |
| 18. Average mean thickness parsorbitalis              | -0.0009              | -0.002, -0.000 | 0.0146         | 0.0206        | -0.0018                              | -0.004, 0.000  | 0.0664         | 0.1140        | -0.0002              | -0.001, 0.001         | 0.6320         | 0.8040        | -0.0007                              | -0.003, 0.001         | 0.4810         | 0.7850        |
| 19. Average mean thickness parstriangularis           | -0.0005              | -0.001, 0.000  | 0.0816         | 0.1010        | -0.0005                              | -0.002, 0.001  | 0.5590         | 0.6620        | 0                    | -0.001, 0.001         | 0.9290         | 0.9600        | 0.0002                               | -0.002, 0.002         | 0.8270         | 0.9780        |
| 20. Average mean thickness pericalcarine              | 0.0015               | 0.001, 0.002   |                |               | 0.0032                               | 0.002, 0.005   | 0.0001         | 0.0003        | 0.0009               | 0.000, 0.002          | 0.0117         | 0.0801        | 0.0012                               | -0.000, 0.003         | 0.1570         | 0.3740        |
| 21. Average mean thickness postcentral                | -0.0004              | -0.001, 0.000  | 0.2490         | 0.2570        | -0.0001                              | -0.002, 0.002  | 0.8920         | 0.9220        | -0.0002              | -0.001, 0.001         | 0.5910         | 0.7970        | -0.0003                              | -0.002, 0.002         | 0.7680         | 0.9780        |
| 22. Average mean thickness posterior cingulate        | -0.0013              | -0.002, -0.001 | 0.0002         | 0.0004        | -0.0024                              | -0.004, -0.000 | 0.0151         | 0.0360        | -0.0004              | -0.001, 0.000         | 0.3070         | 0.5290        | -0.0008                              | -0.003, 0.001         | 0.4590         | 0.7850        |
| 23. Average mean thickness precentral                 | -0.0021              | -0.003, -0.001 |                |               | -0.0045                              | -0.007, -0.002 |                | 0.0001        | -0.0008              | -0.002, 0.000         | 0.0818         | 0.2010        | -0.0025                              | -0.005, -0.000        | 0.0271         | 0.1200        |
| 24. Average mean thickness precuneus                  | -0.0001              | -0.001, 0.000  | 0.7300         | 0.7300        | -0.0005                              | -0.002, 0.001  | 0.5770         | 0.6620        | 0.0004               | -0.000, 0.001         | 0.2110         | 0.4090        | -0.0001                              | -0.002, 0.002         | 0.9420         | 0.9780        |
| 25. Average mean thickness rostral anterior cingulate | -0.0015              | -0.002, -0.001 | 0.0001         | 0.0003        | -0.0033                              | -0.005, -0.001 | 0.0018         | 0.0050        | -0.0008              | -0.002, 0.000         | 0.0843         | 0.2010        | -0.0015                              | -0.004, 0.001         | 0.1960         | 0.4340        |
| 26. Average mean thickness rostral middle frontal     | -0.0003              | -0.001, 0.000  | 0.2180         | 0.2330        | -0.0001                              | -0.002, 0.001  | 0.9260         | 0.9260        | -0.0001              | -0.001, 0.000         | 0.6480         | 0.8040        | 0                                    | -0.002, 0.002         | 0.9780         | 0.9780        |
| 27. Average mean thickness superior frontal           | -0.0011              | -0.002, -0.000 | 0.0007         | 0.0013        | -0.0020                              | -0.004, -0.000 | 0.0212         | 0.0469        | -0.0003              | -0.001, 0.000         | 0.4050         | 0.6610        | -0.0009                              | -0.003, 0.001         | 0.3360         | 0.6130        |
| 28. Average mean thickness superior parietal          | 0.0004               | -0.000, 0.001  | 0.1970         | 0.2180        | 0.0009                               | -0.001, 0.003  | 0.2710         | 0.3360        | 0.0004               | -0.000, 0.001         | 0.2870         | 0.5230        | 0.0001                               | -0.002, 0.002         | 0.8780         | 0.9780        |
| 29. Average mean thickness superior temporal          | -0.0026              | -0.003, -0.002 |                |               | -0.0049                              | -0.007, -0.003 |                |               | <b>-0.0012</b>       | <b>-0.002, -0.000</b> | <b>0.0018</b>  | <b>0.0431</b> | -0.0023                              | -0.004, -0.000        | 0.0204         | 0.1050        |
| 30. Average mean thickness supramarginal              | -0.0009              | -0.002, -0.000 | 0.0026         | 0.0044        | -0.0015                              | -0.003, 0.000  | 0.0756         | 0.1230        | -0.0001              | -0.001, 0.001         | 0.8490         | 0.9080        | -0.0001                              | -0.002, 0.002         | 0.8730         | 0.9780        |
| 31. Average mean thickness transverse temporal        | -0.0008              | -0.002, 0.000  | 0.1400         | 0.1610        | -0.0023                              | -0.005, 0.001  | 0.1140         | 0.1770        | 0                    | -0.001, 0.001         | 0.9620         | 0.9620        | -0.0016                              | -0.005, 0.001         | 0.2890         | 0.5910        |

## Sensitivity analyses. stroke and 1SD/2SD cognitive decline

Table 20. Foundation models - reaction time stroke/no stroke datasets

| Characteristic                       | Original model          |                     |         | Stroke admissions       |                     |         | No stroke admissions    |                     |         |
|--------------------------------------|-------------------------|---------------------|---------|-------------------------|---------------------|---------|-------------------------|---------------------|---------|
|                                      | Mean change per surgery | 95% CI <sup>1</sup> | p-value | Mean change per surgery | 95% CI <sup>1</sup> | p-value | Mean change per surgery | 95% CI <sup>1</sup> | p-value |
| Cumulative Surgeries                 | 1.957                   | 1.742, 2.173        |         | -2.155                  | -7.960, 3.650       | 0.4660  | 1.942                   | 1.726, 2.157        |         |
| Time in years                        | 0.880                   | 0.325, 1.435        | 0.0019  | -5.559                  | -33.776, 22.659     | 0.6990  | 0.902                   | 0.347, 1.456        | 0.0015  |
| Baseline age                         | 27.853                  | 22.831, 32.875      |         | 91.037                  | -152.989, 335.063   | 0.4640  | 27.629                  | 22.607, 32.651      |         |
| Baseline age <sup>2</sup> normalised | 5.373                   | 5.296, 5.449        |         | 3.998                   | 0.532, 7.465        | 0.0240  | 5.373                   | 5.297, 5.450        |         |
| Sex Female                           | 18.545                  | 17.924, 19.166      |         | 32.128                  | 4.326, 59.930       | 0.0236  | 18.584                  | 17.963, 19.205      |         |
| No. Obs.                             | 544,520                 |                     |         | 531                     |                     |         | 543,989                 |                     |         |
| Log-likelihood                       | -3,329,819              |                     |         | -3,387                  |                     |         | -3,326,300              |                     |         |
| AIC <sup>1</sup>                     | 6,659,655               |                     |         | 6,789                   |                     |         | 6,652,617               |                     |         |
| BIC <sup>1</sup>                     | 6,659,744               |                     |         | 6,824                   |                     |         | 6,652,706               |                     |         |
| Residual df                          | 544,512                 |                     |         | 523                     |                     |         | 543,981                 |                     |         |

<sup>1</sup>CI = Confidence Interval, AIC = Akaike's Information Criteria, BIC = Bayesian Information Criteria, Age<sup>2</sup> norm. = Quadratic term normalized by variable<sup>2</sup> / 1000. All p<0.0001 unless indicated.

**Table 21. Fully adjusted models - reaction time with stroke/no stroke datasets**

| Characteristic                       | Original model          |                     |         | Stroke admissions       |                     |         | No stroke admissions    |                     |         |
|--------------------------------------|-------------------------|---------------------|---------|-------------------------|---------------------|---------|-------------------------|---------------------|---------|
|                                      | Mean change per surgery | 95% CI <sup>1</sup> | p-value | Mean change per surgery | 95% CI <sup>1</sup> | p-value | Mean change per surgery | 95% CI <sup>1</sup> | p-value |
| Cumulative Surgeries                 | 0.273                   | 0.022, 0.523        | 0.0327  | -5.296                  | -13.255, 2.663      | 0.1917  | 0.282                   | 0.032, 0.533        | 0.0272  |
| Cumulative Stroke Admissions         | 3.892                   | 3.265, 4.518        | 0.0000  | 7.897                   | -0.299, 16.093      | 0.0589  | 3.847                   | 3.217, 4.478        | 0.0000  |
| Cumulative Other Medical Admissions  | 41.812                  | 33.057, 50.567      | 0.0000  | 52.230                  | -4.601, 109.062     | 0.0716  | NA                      |                     | NA      |
| Time in years                        | 2.572                   | 2.021, 3.123        | 0.0000  | -5.674                  | -33.319, 21.972     | 0.6869  | 2.584                   | 2.033, 3.135        | 0.0000  |
| Baseline age                         | 11.306                  | 6.316, 16.297       | 0.0000  | 88.209                  | -                   | 0.4692  | 11.195                  | 6.204, 16.186       | 0.0000  |
| Baseline age <sup>2</sup> normalised | 5.150                   | 5.055, 5.244        | 0.0000  | 4.801                   | 0.375, 9.227        | 0.0337  | 5.149                   | 5.055, 5.244        | 0.0000  |
| Sex Female                           | 3.247                   | 3.142, 3.352        | 0.0000  | 2.279                   | -1.774, 6.332       | 0.2699  | 3.248                   | 3.143, 3.353        | 0.0000  |
| Deprivation                          | 15.280                  | 14.626, 15.933      | 0.0000  | 26.016                  | -3.222, 55.254      | 0.0810  | 15.276                  | 14.622, 15.929      | 0.0000  |
| Education                            | NA                      |                     | NA      | NA                      |                     | NA      | NA                      |                     | NA      |
| None of the above                    | 22.607                  | 21.675, 23.539      | 0.0000  | 58.632                  | 24.295, 92.969      | 0.0009  | 22.550                  | 21.618, 23.483      | 0.0000  |
| Prefer not to answer                 | 34.267                  | 31.208, 37.327      | 0.0000  | 39.126                  | -72.097, 150.349    | 0.4898  | 34.257                  | 31.197, 37.317      | 0.0000  |
| Secondary <12 years                  | 8.178                   | 7.453, 8.903        | 0.0000  | -6.570                  | -39.445, 26.306     | 0.6948  | 8.193                   | 7.468, 8.918        | 0.0000  |

Association between surgical admissions, cognition, and neurodegeneration in older people: UK Biobank population-based study – Supplementary Material

| Characteristic                        | Original model          |                     |         | Stroke admissions       |                     |         | No stroke admissions    |                     |         |
|---------------------------------------|-------------------------|---------------------|---------|-------------------------|---------------------|---------|-------------------------|---------------------|---------|
|                                       | Mean change per surgery | 95% CI <sup>1</sup> | p-value | Mean change per surgery | 95% CI <sup>1</sup> | p-value | Mean change per surgery | 95% CI <sup>1</sup> | p-value |
| Secondary 12 years                    | 3.368                   | 2.196, 4.540        | 0.0000  | 10.023                  | -43.093, 63.139     | 0.7110  | 3.361                   | 2.189, 4.533        | 0.0000  |
| BMI                                   | -1.542                  | -1.988, -1.095      | 0.0000  | 7.154                   | -12.583, 26.891     | 0.4767  | -1.549                  | -1.995, -1.103      | 0.0000  |
| BMI <sup>2</sup> norm·                | 20.768                  | 13.427, 28.109      | 0.0000  | -131.758                | -452.109, 188.594   | 0.4194  | 20.900                  | 13.558, 28.242      | 0.0000  |
| Ever smoked                           | -3.901                  | -4.535, -3.268      | 0.0000  | -0.528                  | -29.215, 28.158     | 0.9711  | -3.908                  | -4.542, -3.275      | 0.0000  |
| Ever depression                       | 7.641                   | 6.910, 8.371        | 0.0000  | -16.753                 | -51.063, 17.557     | 0.3378  | 7.660                   | 6.929, 8.391        | 0.0000  |
| Average weekly alcohol units (scaled) | -4.588                  | -4.904, -4.273      | 0.0000  | -12.778                 | -26.476, 0.920      | 0.0674  | -4.577                  | -4.893, -4.261      | 0.0000  |
| IPAQ physical activity                | NA                      |                     | NA      | NA                      |                     | NA      | NA                      |                     | NA      |
| Moderate                              | 2.930                   | 2.161, 3.699        | 0.0000  | 46.938                  | 9.375, 84.500       | 0.0144  | 2.900                   | 2.131, 3.669        | 0.0000  |
| Low                                   | 3.601                   | 2.621, 4.582        | 0.0000  | 14.048                  | -25.560, 53.655     | 0.4862  | 3.615                   | 2.634, 4.595        | 0.0000  |
| Missing                               | 6.745                   | 5.880, 7.609        | 0.0000  | 33.747                  | -4.783, 72.278      | 0.0859  | 6.733                   | 5.869, 7.597        | 0.0000  |
| Hypertension                          | 3.933                   | 3.196, 4.669        | 0.0000  | 19.141                  | -7.338, 45.620      | 0.1561  | 3.916                   | 3.179, 4.653        | 0.0000  |
| Diabetes                              | 11.930                  | 10.386, 13.474      | 0.0000  | -12.627                 | -50.023, 24.768     | 0.5073  | 12.005                  | 10.459, 13.550      | 0.0000  |

Association between surgical admissions, cognition, and neurodegeneration in older people: UK Biobank population-based study – Supplementary Material

| Characteristic                                             | Original model          |                     |         | Stroke admissions       |                     |         | No stroke admissions    |                     |         |
|------------------------------------------------------------|-------------------------|---------------------|---------|-------------------------|---------------------|---------|-------------------------|---------------------|---------|
|                                                            | Mean change per surgery | 95% CI <sup>1</sup> | p-value | Mean change per surgery | 95% CI <sup>1</sup> | p-value | Mean change per surgery | 95% CI <sup>1</sup> | p-value |
| Solid tumour                                               | -2.306                  | -3.425, -1.187      | 0.0001  | -24.693                 | -67.162, 17.776     | 0.2538  | -2.285                  | -3.404, -1.166      | 0.0001  |
| Cumulative Surgeries * Cumulative Other Medical Admissions | -0.234                  | -0.357, -0.111      | 0.0002  | -0.333                  | -1.864, 1.198       | 0.6695  | -0.226                  | -0.350, -0.102      | 0.0004  |
| Time in years * Deprivation                                | -0.118                  | -0.145, -0.092      | 0.0000  | -0.852                  | -2.188, 0.485       | 0.2098  | -0.118                  | -0.144, -0.092      | 0.0000  |
| No. Obs.                                                   | 544,520                 |                     |         | 531                     |                     |         | 543,989                 |                     |         |
| Log-likelihood                                             | -3,324,271              |                     |         | -3,296                  |                     |         | -3,320,836              |                     |         |
| AIC <sup>1</sup>                                           | 6,648,598               |                     |         | 6,648                   |                     |         | 6,641,725               |                     |         |
| BIC <sup>1</sup>                                           | 6,648,912               |                     |         | 6,767                   |                     |         | 6,642,028               |                     |         |
| Residual df                                                | 544,492                 |                     |         | 503                     |                     |         | 543,962                 |                     |         |

<sup>1</sup>CI = Confidence Interval; OR = Odds Ratio; TMTA = trail making test A; TMTB = trail making test B; SDST = symbol digit substitution. All available data were used across instances 0, 2, 3. All p<0.0001 unless indicated.

<sup>2</sup>All models were linear mixed effects models of all available data. Foundation models were minimally adjusted. cognitive outcome ~ surgeries + age + age<sup>2</sup> normalised/1000 + time + female sex + (1|participant).

<sup>3</sup>Fully adjusted models were cognitive outcome ~ surgeries + cumulative stroke admissions + cumulative other medical admissions + age + age<sup>2</sup> normalised + time\*deprivation + female sex + education + body mass index + body mass index<sup>2</sup> normalised + smoking + depression + alcohol consumption + physical activity + hypertension + diabetes + solid tumour + (1|participant). Quadratic terms normalised by variable<sup>2</sup> / 1000. Interaction for surgeries\*other medical admissions and time\*deprivation included in reaction time, fluid intelligence and prospective memory fully adjusted models. Linear smoothing uses the formula,  $y \sim x + I(x^2)$ . Cumulative surgical procedures calculated from 8 years prior to baseline (instance 0).

**Table 22. Foundation models - fluid intelligence and stroke/no stroke datasets**

| Characteristic                       | Original model          |                     |         | Stroke admissions       |                     |         | No stroke admissions    |                     |         |
|--------------------------------------|-------------------------|---------------------|---------|-------------------------|---------------------|---------|-------------------------|---------------------|---------|
|                                      | Mean change per surgery | 95% CI <sup>1</sup> | p-value | Mean change per surgery | 95% CI <sup>1</sup> | p-value | Mean change per surgery | 95% CI <sup>1</sup> | p-value |
| Cumulative Surgeries                 | -0.114                  | -0.121, -0.107      |         | -0.121                  | -0.309, 0.068       | 0.2060  | -0.113                  | -0.120, -0.106      |         |
| Time in years                        | 0.251                   | 0.233, 0.270        |         | 1.379                   | 0.468, 2.289        | 0.0034  | 0.251                   | 0.233, 0.269        |         |
| Baseline age                         | -2.368                  | -2.533, -2.202      |         | -12.026                 | -19.875, -4.177     | 0.0030  | -2.363                  | -2.529, -2.198      |         |
| Baseline age <sup>2</sup> normalised | 0.023                   | 0.021, 0.026        |         | 0.125                   | -0.026, 0.276       | 0.1040  | 0.023                   | 0.021, 0.026        |         |
| Sex Female                           | -0.249                  | -0.270, -0.229      |         | -0.806                  | -1.654, 0.042       | 0.0624  | -0.249                  | -0.270, -0.229      |         |
| Log-likelihood                       | 182,490                 |                     |         | 126                     |                     |         | 182,364                 |                     |         |
| AIC <sup>1</sup>                     | -391,363                |                     |         | -280                    |                     |         | -391,079                |                     |         |
| BIC <sup>1</sup>                     | 782,741                 |                     |         | 577                     |                     |         | 782,173                 |                     |         |
| Residual df                          | 782,822                 |                     |         | 599                     |                     |         | 782,254                 |                     |         |
| No. Obs.                             | 182,482                 |                     |         | 118                     |                     |         | 182,356                 |                     |         |

<sup>1</sup>CI = Confidence Interval; OR = Odds Ratio; TMTA = trail making test A; TMTB = trail making test B; SDST = symbol digit substitution. All available data were used across instances 0, 2, 3. All p<0.0001 unless indicated.

<sup>2</sup>All models were linear mixed effects models of all available data. Foundation models were minimally adjusted. cognitive outcome ~ surgeries + age + age<sup>2</sup> normalised/1000 + time + female sex + (1|participant).

<sup>3</sup>Fully adjusted models were cognitive outcome ~ surgeries + cumulative stroke admissions + cumulative other medical admissions + age + age<sup>2</sup> normalised + time\*deprivation + female sex + education + body mass index + body mass index<sup>2</sup> normalised + smoking + depression + alcohol consumption + physical activity + hypertension + diabetes + solid tumour + (1|participant). Quadratic terms normalised by variable<sup>2</sup> / 1000. Interaction for surgeries\*other medical admissions and time\*deprivation included in reaction time, fluid intelligence and prospective memory fully adjusted models. Linear smoothing uses the formula,  $y \sim x + I(x^2)$ . Cumulative surgical procedures calculated from 8 years prior to baseline (instance 0).

**Table 23. Fully adjusted models - fluid intelligence with stroke/no stroke datasets**

| Characteristic                       | Original model          |                |         | Stroke admissions       |                 |               | No stroke admissions    |                |         |
|--------------------------------------|-------------------------|----------------|---------|-------------------------|-----------------|---------------|-------------------------|----------------|---------|
|                                      | Mean change per surgery | 95% CI1        | p-value | Mean change per surgery | 95% CI1         | p-value       | Mean change per surgery | 95% CI1        | p-value |
| Cumulative Surgeries                 | -0.057                  | -0.064, -0.049 |         | 0.167                   | -0.097, 0.432   | <b>0.2120</b> | -0.057                  | -0.065, -0.050 |         |
| Cumulative Stroke Admissions         | -0.093                  | -0.113, -0.074 |         | 0.182                   | -0.054, 0.419   | 0.1290        | -0.095                  | -0.114, -0.076 |         |
| Cumulative Other Medical Admissions  | -0.348                  | -0.674, -0.021 | 0.0371  | -0.911                  | -3.036, 1.215   | 0.3970        |                         |                |         |
| Time in years                        | 0.157                   | 0.140, 0.174   |         | 0.949                   | 0.029, 1.869    | 0.0433        | 0.156                   | 0.140, 0.173   |         |
| Baseline age                         | -1.388                  | -1.540, -1.235 |         | -8.294                  | -16.259, -0.328 | 0.0415        | -1.385                  | -1.538, -1.233 |         |
| Baseline age <sup>2</sup> normalised | 0.013                   | 0.010, 0.016   |         | -0.039                  | -0.191, 0.114   | 0.6090        | 0.013                   | 0.010, 0.016   |         |
| Sex Female                           | -0.073                  | -0.077, -0.070 |         | -0.064                  | -0.192, 0.063   | 0.3210        | -0.073                  | -0.077, -0.070 |         |
| Deprivation                          | -0.171                  | -0.191, -0.151 |         | -0.823                  | -1.717, 0.071   | 0.0707        | -0.170                  | -0.190, -0.150 |         |
| Education (Ref = Tertiary)           |                         |                |         |                         |                 |               |                         |                |         |
| None of the above                    | -2.003                  | -2.033, -1.973 |         | -2.163                  | -3.290, -1.036  | 0.0002        | -2.003                  | -2.032, -1.973 |         |
| Prefer not to answer                 | -2.124                  | -2.224, -2.024 |         | -0.461                  | -3.508, 2.585   | 0.7640        | -2.125                  | -2.225, -2.025 |         |
| Secondary <12 years                  | -0.993                  | -1.015, -0.971 |         | -1.254                  | -2.183, -0.324  | 0.0088        | -0.993                  | -1.015, -0.971 |         |
| Secondary 12 years                   | -0.163                  | -0.198, -0.127 |         | 0.643                   | -1.174, 2.460   | 0.4840        | -0.163                  | -0.198, -0.128 |         |

Association between surgical admissions, cognition, and neurodegeneration in older people: UK Biobank population-based study – Supplementary Material

| Characteristic                                             | Original model          |                |         | Stroke admissions       |                |         | No stroke admissions    |                |         |
|------------------------------------------------------------|-------------------------|----------------|---------|-------------------------|----------------|---------|-------------------------|----------------|---------|
|                                                            | Mean change per surgery | 95% CI1        | p-value | Mean change per surgery | 95% CI1        | p-value | Mean change per surgery | 95% CI1        | p-value |
| BMI                                                        | -0.031                  | -0.045, -0.017 |         | 0.297                   | -0.246, 0.841  | 0.2800  | -0.031                  | -0.045, -0.018 |         |
| BMI <sup>2</sup> norm                                      | 0.503                   | 0.279, 0.727   |         | -4.721                  | -13.218, 3.776 | 0.2730  | 0.506                   | 0.281, 0.730   |         |
| Ever smoked                                                | 0.157                   | 0.137, 0.176   |         | 0.314                   | -0.505, 1.134  | 0.4480  | 0.156                   | 0.137, 0.176   |         |
| Ever depression                                            | 0.059                   | 0.040, 0.077   |         | 0.113                   | -0.635, 0.861  | 0.7650  | 0.059                   | 0.040, 0.077   |         |
| Average weekly alcohol units (scaled)                      | 0.137                   | 0.127, 0.146   |         | -0.060                  | -0.475, 0.356  | 0.7770  | 0.137                   | 0.127, 0.146   |         |
| IPAQ physical activity (Ref = High)                        |                         |                |         |                         |                |         |                         |                |         |
| Moderate                                                   | 0.306                   | 0.283, 0.330   |         | 0.828                   | -0.284, 1.939  | 0.1430  | 0.306                   | 0.283, 0.329   |         |
| Low                                                        | 0.325                   | 0.294, 0.355   |         | 1.148                   | -0.056, 2.351  | 0.0613  | 0.325                   | 0.294, 0.355   |         |
| Missing                                                    | -0.140                  | -0.167, -0.113 |         | 0.572                   | -0.481, 1.625  | 0.2840  | -0.140                  | -0.167, -0.114 |         |
| Hypertension                                               | -0.097                  | -0.119, -0.074 |         | -0.227                  | -1.063, 0.608  | 0.5900  | -0.097                  | -0.120, -0.074 |         |
| Diabetes                                                   | -0.191                  | -0.237, -0.144 |         | -1.617                  | -2.654, -0.580 | 0.0026  | -0.187                  | -0.234, -0.141 |         |
| Solid tumour                                               | 0.133                   | 0.098, 0.167   |         | 0.497                   | -0.813, 1.808  | 0.4530  | 0.132                   | 0.097, 0.166   |         |
| Cumulative Surgeries * Cumulative Other Medical Admissions | 0.009                   | 0.005, 0.012   |         | -0.081                  | -0.147, -0.016 | 0.0155  | 0.009                   | 0.005, 0.012   |         |



| Characteristic              | Original model          |              |         | Stroke admissions       |               |         | No stroke admissions    |              |         |
|-----------------------------|-------------------------|--------------|---------|-------------------------|---------------|---------|-------------------------|--------------|---------|
|                             | Mean change per surgery | 95% CI1      | p-value | Mean change per surgery | 95% CI1       | p-value | Mean change per surgery | 95% CI1      | p-value |
| Time in years * Deprivation | 0.001                   | 0.000, 0.002 | 0.0150  | -0.016                  | -0.067, 0.034 | 0.5140  | 0.001                   | 0.000, 0.002 | 0.0133  |
| No. Obs.                    | 182,490                 |              |         | 126                     |               |         | 182,364                 |              |         |
| Log-likelihood              | -376,926                |              |         | -260                    |               |         | -376,662                |              |         |
| AIC <sup>1</sup>            | 753,909                 |              |         | 575                     |               |         | 753,379                 |              |         |
| BIC <sup>1</sup>            | 754,192                 |              |         | 655                     |               |         | 753,652                 |              |         |
| Residual df                 | 182,462                 |              |         | 98                      |               |         | 182,337                 |              |         |

<sup>1</sup>CI = Confidence Interval; OR = Odds Ratio; TMTA = trail making test A; TMTB = trail making test B; SDST = symbol digit substitution. All available data were used across instances 0, 2, 3. All p<0.0001 unless indicated.

<sup>2</sup>All models were linear mixed effects models of all available data. Foundation models were minimally adjusted. cognitive outcome ~ surgeries + age + age<sup>2</sup>normalised/1000 + time + female sex + (1|participant).

<sup>3</sup>Fully adjusted models were cognitive outcome ~ surgeries + cumulative stroke admissions + cumulative other medical admissions + age + age<sup>2</sup>normalised + time\*deprivation + female sex + education + body mass index + body mass index<sup>2</sup> normalised + smoking + depression + alcohol consumption + physical activity + hypertension + diabetes + solid tumour + (1|participant). Quadratic terms normalised by variable<sup>2</sup> / 1000. Interaction for surgeries\*other medical admissions and time\*deprivation included in reaction time, fluid intelligence and prospective memory fully adjusted models. Linear smoothing uses the formula,  $y \sim x + I(x^2)$ . Cumulative surgical procedures calculated from 8 years prior to baseline (instance 0).

**Table 24. Foundation models cognition ~ cumulative surgeries from baseline**

| Characteristic                             | Original Reaction time, milliseconds |                     |         | Subset reaction time, milliseconds |                     |         | Original Fluid intelligence, correct |                     |         | Subset fluid intelligence, correct |                     |         |
|--------------------------------------------|--------------------------------------|---------------------|---------|------------------------------------|---------------------|---------|--------------------------------------|---------------------|---------|------------------------------------|---------------------|---------|
|                                            | Mean change per surgery              | 95% CI <sup>1</sup> | p-value | Mean change per surgery            | 95% CI <sup>1</sup> | p-value | Mean change per surgery              | 95% CI <sup>1</sup> | p-value | Mean change per surgery            | 95% CI <sup>1</sup> | p-value |
| Cumulative Surgeries (from baseline – 8 y) | 1.957                                | 1.742, 2.173        |         |                                    |                     |         | -0.114                               | -0.121, -0.107      |         |                                    |                     |         |
| Cumulative Surgeries (from baseline)       |                                      |                     |         | 1.039                              | 0.542, 1.536        |         |                                      |                     |         | -0.050                             | -0.065, -0.034      |         |
| Time in years                              | 5.373                                | 5.296, 5.449        |         | 5.465                              | 5.372, 5.558        |         | 0.023                                | 0.021, 0.026        |         | 0.016                              | 0.013, 0.019        |         |
| Baseline age                               | 0.880                                | 0.325, 1.435        | 0.0019  | 0.806                              | 0.250, 1.361        | 0.0045  | 0.251                                | 0.233, 0.270        |         | 0.256                              | 0.237, 0.274        |         |
| Baseline age <sup>2</sup> normalised       | 27.853                               | 22.831, 32.875      |         | 28.964                             | 23.942, 33.987      |         | -2.368                               | -2.533, -2.202      |         | -2.434                             | -2.600, -2.267      |         |
| Sex Female                                 | 18.545                               | 17.924, 19.166      |         | 18.661                             | 18.040, 19.283      |         | -0.249                               | -0.270, -0.229      |         | -0.256                             | -0.277, -0.236      |         |
| No. Obs.                                   | 544,520                              |                     |         | 544,520                            |                     |         | 182,490                              |                     |         | 182,490                            |                     |         |
| Log-likelihood                             | -3,329,819                           |                     |         | -3,329,968                         |                     |         | -391,363                             |                     |         | -391,847                           |                     |         |
| AIC                                        | 6,659,655                            |                     |         | 6,659,953                          |                     |         | 782,741                              |                     |         | 783,711                            |                     |         |
| BIC                                        | 6,659,744                            |                     |         | 6,660,043                          |                     |         | 782,222                              |                     |         | 783,792                            |                     |         |
| Residual df                                | 544,512                              |                     |         | 544,512                            |                     |         | 182,482                              |                     |         | 182,482                            |                     |         |

<sup>1</sup>CI = Confidence Interval; OR = Odds Ratio; TMTA = trail making test A; TMTB = trail making test B; SDST = symbol digit substitution. All available data were used across instances 0, 2, 3. All p<0.0001 unless indicated.

<sup>2</sup>All models were linear mixed effects models of all available data. Foundation models were minimally adjusted. cognitive outcome ~ surgeries + age + age<sup>2</sup>normalised/1000 + time + female sex + (1|participant).

<sup>3</sup>Fully adjusted models were cognitive outcome ~ surgeries + cumulative stroke admissions + cumulative other medical admissions + age + age<sup>2</sup>normalised + time\*deprivation + female sex + education + body mass index + body mass index<sup>2</sup> normalised + smoking + depression + alcohol consumption + physical activity + hypertension + diabetes + solid tumour + (1|participant).

Quadratic terms normalised by  $\text{variable}^2 / 1000$ . Interaction for surgeries\*other medical admissions and time\*deprivation included in reaction time, fluid intelligence and prospective memory fully adjusted models. Linear smoothing uses the formula,  $y \sim x + l(x^2)$ . Cumulative surgical procedures calculated from 8 years prior to baseline (instance 0).

## Cognitive decline models

### Reaction time

**Table 25. Foundation models. Reaction time 1SD/2SD cognitive decline ~ cumulative surgeries I-2 – I-0 & I-3-I-2**

| Primary outcome. reaction time | Cognitive Decline 1SD |                     |         | Cognitive Decline 2SD |                     |         |
|--------------------------------|-----------------------|---------------------|---------|-----------------------|---------------------|---------|
| Characteristic                 | OR <sup>1</sup>       | 95% CI <sup>1</sup> | p-value | OR <sup>1</sup>       | 95% CI <sup>1</sup> | p-value |
| Cumulative Surgeries           | 1.019                 | 1.010, 1.029        |         | 1.025                 | 1.007, 1.042        | 0.0048  |
| Time in years                  | 1.032                 | 1.029, 1.034        |         | 1.046                 | 1.041, 1.051        |         |
| Baseline age                   | 1.093                 | 1.085, 1.101        |         | 1.110                 | 1.094, 1.127        |         |
| Sex Female                     | 1.161                 | 1.119, 1.206        |         | 1.193                 | 1.109, 1.284        |         |
| No. Obs.                       | 63,467                |                     |         | 63,467                |                     |         |
| Log-likelihood                 | -34,041               |                     |         | -12,130               |                     |         |
| AIC                            | 68,094                |                     |         | 24,272                |                     |         |
| BIC                            | 68,148                |                     |         | 24,326                |                     |         |
| Residual df                    | 63,461                |                     |         | 63,461                |                     |         |

<sup>1</sup>OR = Odds Ratio, CI = Confidence Interval. All p<0.0001 unless indicated.

**Table 26. Foundation models. Reaction time 1SD/2SD cognitive decline ~ cumulative surgeries as a factor I-2 – I-0 & I-3-I-2**

| Primary outcome. reaction time | Cognitive Decline 1SD |                     |         | Cognitive Decline 2SD |                     |         |
|--------------------------------|-----------------------|---------------------|---------|-----------------------|---------------------|---------|
| Characteristic                 | OR <sup>1</sup>       | 95% CI <sup>1</sup> | p-value | OR <sup>1</sup>       | 95% CI <sup>1</sup> | p-value |
| Cumulative Surgeries factored  |                       |                     |         |                       |                     |         |
| 1-2                            | 1.023                 | 0.978, 1.070        | 0.3200  | 1.031                 | 0.942, 1.128        | 0.5074  |
| 3-5                            | 1.080                 | 1.025, 1.139        | 0.0040  | 1.099                 | 0.992, 1.218        | 0.0719  |
| 6+                             | 1.164                 | 1.072, 1.264        | 0.0003  | 1.162                 | 0.995, 1.357        | 0.0572  |
| Time in years                  | 1.032                 | 1.029, 1.034        |         | 1.046                 | 1.041, 1.052        |         |
| Baseline age                   | 1.093                 | 1.085, 1.101        |         | 1.110                 | 1.094, 1.127        |         |
| Sex Female                     | 1.161                 | 1.119, 1.205        |         | 1.193                 | 1.109, 1.283        |         |
| No. Obs.                       | 63,467                |                     |         | 63,467                |                     |         |
| Log-likelihood                 | -34,040               |                     |         | -12,131               |                     |         |
| AIC                            | 68,097                |                     |         | 24,278                |                     |         |
| BIC                            | 68,169                |                     |         | 24,351                |                     |         |
| Residual df                    | 63,459                |                     |         | 63,459                |                     |         |

<sup>1</sup>OR = Odds Ratio, CI = Confidence Interval. All p<0.0001 unless indicated.

**Table 27. Foundation models. Reaction time 1SD/2SD cognitive decline ~ high complexity surgeries I-2 – I-0 & I-3-I-2**

| Primary outcome. reaction time        | Cognitive Decline 1SD |                     |         | Cognitive Decline 2SD |                     |         |
|---------------------------------------|-----------------------|---------------------|---------|-----------------------|---------------------|---------|
| Characteristic                        | OR <sup>1</sup>       | 95% CI <sup>1</sup> | p-value | OR <sup>1</sup>       | 95% CI <sup>1</sup> | p-value |
| Cumulative Major+Major++CMO Surgeries | 1.053                 | 1.027, 1.079        |         | 1.058                 | 1.010, 1.107        | 0.0166  |
| Time in years                         | 1.032                 | 1.029, 1.034        |         | 1.046                 | 1.041, 1.052        |         |
| Baseline age                          | 1.093                 | 1.085, 1.102        |         | 1.111                 | 1.094, 1.127        |         |
| Sex Female                            | 1.156                 | 1.114, 1.201        |         | 1.187                 | 1.103, 1.278        |         |
| No. Obs.                              | 63,467                |                     |         | 63,467                |                     |         |
| Log-likelihood                        | -34,041               |                     |         | -12,131               |                     |         |
| AIC                                   | 68,094                |                     |         | 24,274                |                     |         |
| BIC                                   | 68,148                |                     |         | 24,328                |                     |         |
| Residual df                           | 63,461                |                     |         | 63,461                |                     |         |

<sup>1</sup>OR = Odds Ratio, CI = Confidence Interval. All p<0.0001 unless indicated.

**Table 28. Foundation models. Reaction time 1SD/2SD cognitive decline ~ surgical admissions (binary) I-2 – I-0 & I-3-I-2**

| Characteristic      | Primary outcome. reaction time |                     |         | Cognitive Decline 1SD |                     |         | Cognitive Decline 2SD |                     |         |
|---------------------|--------------------------------|---------------------|---------|-----------------------|---------------------|---------|-----------------------|---------------------|---------|
|                     | OR <sup>1</sup>                | 95% CI <sup>1</sup> | p-value | OR <sup>1</sup>       | 95% CI <sup>1</sup> | p-value | OR <sup>1</sup>       | 95% CI <sup>1</sup> | p-value |
| Surgical admissions | 1.051                          | 1.009, 1.095        | 0.0178  | 1.063                 | 0.979, 1.154        | 0.1465  |                       |                     |         |
| Time in years       | 1.032                          | 1.030, 1.035        |         | 1.047                 | 1.042, 1.052        |         |                       |                     |         |
| Baseline age        | 1.094                          | 1.086, 1.103        |         | 1.112                 | 1.096, 1.128        |         |                       |                     |         |
| Sex Female          | 1.161                          | 1.119, 1.206        |         | 1.192                 | 1.108, 1.283        |         |                       |                     |         |
| No. Obs.            | 63,467                         |                     |         | 63,467                |                     |         |                       |                     |         |
| Log-likelihood      | -34,046                        |                     |         | -12,133               |                     |         |                       |                     |         |
| AIC                 | 68,105                         |                     |         | 24,278                |                     |         |                       |                     |         |
| BIC                 | 68,159                         |                     |         | 24,332                |                     |         |                       |                     |         |
| Residual df         | 63,461                         |                     |         | 63,461                |                     |         |                       |                     |         |

<sup>1</sup>OR = Odds Ratio, CI = Confidence Interval. All p<0.0001 unless indicated.

**Table 29. Foundation models. Reaction time 1SD/2SD cognitive decline ~ high complexity surgical admissions (binary) I-2 – I-0 & I-3-I-2**

| Characteristic            | Primary outcome. reaction time |                     |         | Cognitive Decline 1SD |                     |         | Cognitive Decline 2SD |                     |         |
|---------------------------|--------------------------------|---------------------|---------|-----------------------|---------------------|---------|-----------------------|---------------------|---------|
|                           | OR <sup>1</sup>                | 95% CI <sup>1</sup> | p-value | OR <sup>1</sup>       | 95% CI <sup>1</sup> | p-value | OR <sup>1</sup>       | 95% CI <sup>1</sup> | p-value |
| Major surgical admissions | 1.061                          | 1.019, 1.106        | 0.0042  | 1.029                 | 0.951, 1.114        | 0.4652  |                       |                     |         |
| Time in years             | 1.032                          | 1.029, 1.035        |         | 1.047                 | 1.042, 1.052        |         |                       |                     |         |
| Baseline age              | 1.094                          | 1.086, 1.102        |         | 1.112                 | 1.096, 1.129        |         |                       |                     |         |
| Sex Female                | 1.158                          | 1.116, 1.202        |         | 1.191                 | 1.107, 1.282        |         |                       |                     |         |
| No. Obs.                  | 63,467                         |                     |         | 63,467                |                     |         |                       |                     |         |
| Log-likelihood            | -34,045                        |                     |         | -12,134               |                     |         |                       |                     |         |
| AIC                       | 68,102                         |                     |         | 24,279                |                     |         |                       |                     |         |
| BIC                       | 68,157                         |                     |         | 24,334                |                     |         |                       |                     |         |
| Residual df               | 63,461                         |                     |         | 63,461                |                     |         |                       |                     |         |

<sup>1</sup>OR = Odds Ratio, CI = Confidence Interval. All p<0.0001 unless indicated.

**Figure 2. Plots of actual and predicted values for fully adjusted models: association of cumulative surgeries at a specific age for all cognitive outcomes.**

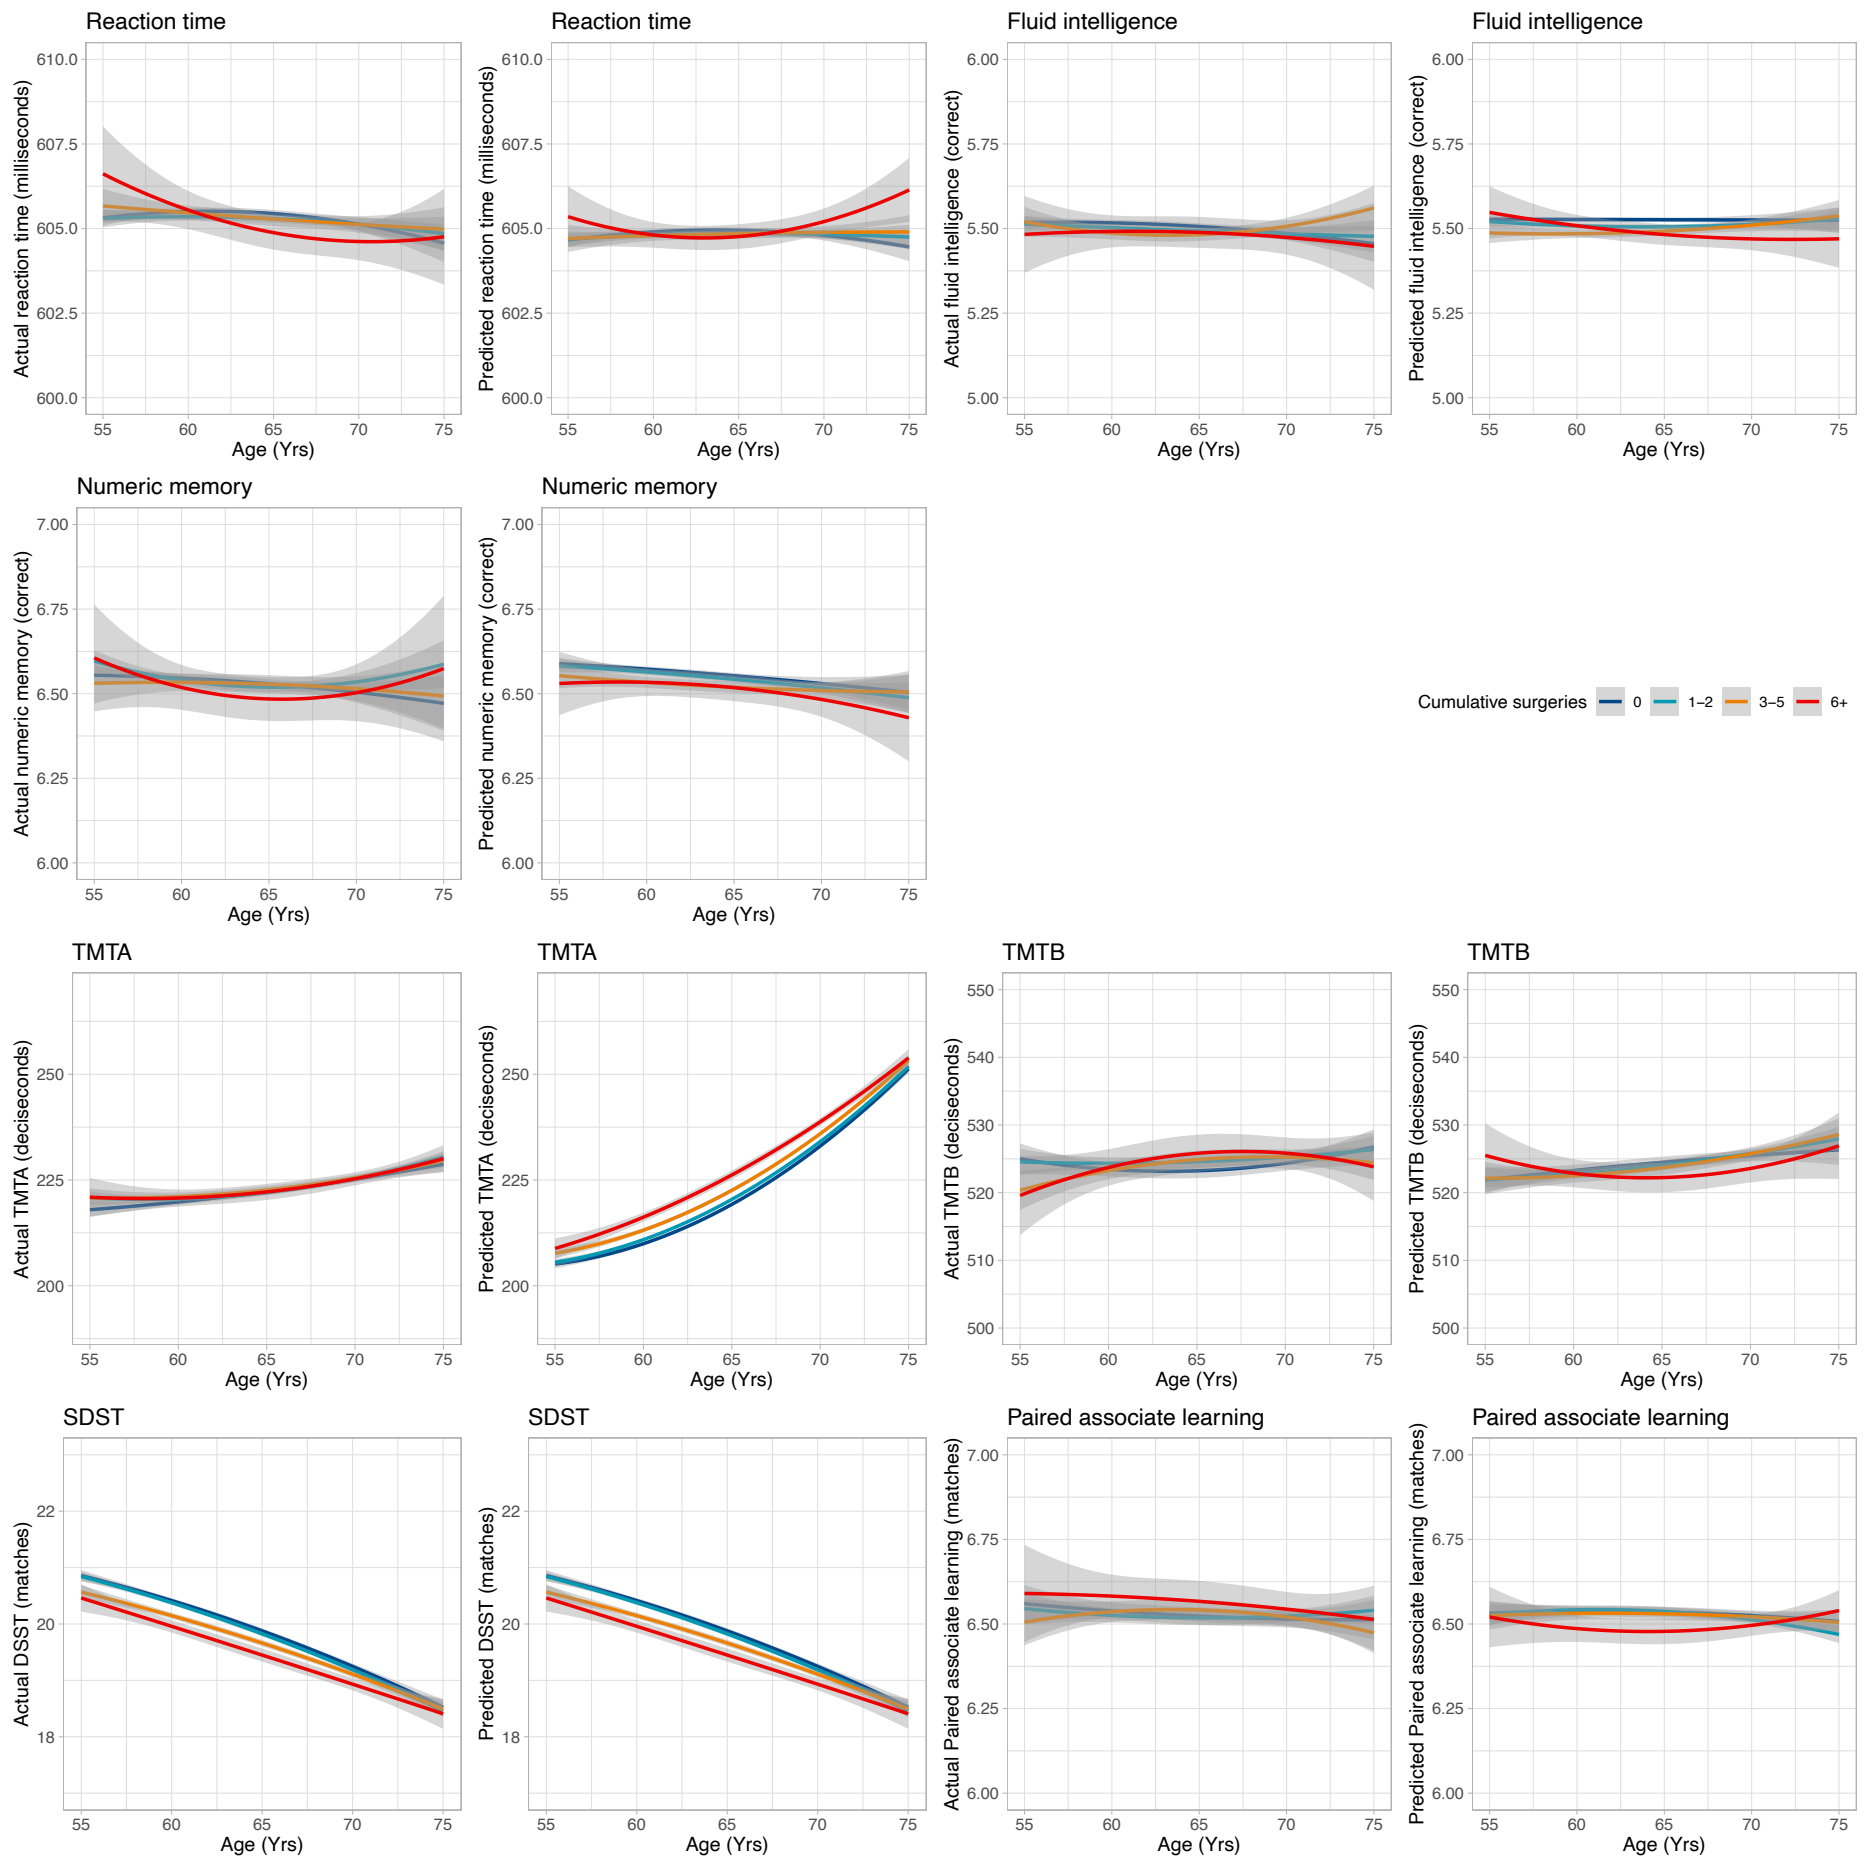

TMTA = Trail making test A; TMTB = Trail making test B; SDST = Symbol digit substitution test. Reaction time, fluid intelligence and numeric memory include Instance-0, Instance-2, and Instance-3 data. TMTA, TMTB, SDST and paired associate learning include Instance-2 and Instance-3 data. All linear mixed effects models fully adjusted for cognitive outcome ~ cumulative surgeries + cumulative stroke admissions + cumulative other medical admissions + baseline age + baseline age<sup>2</sup> normalised + time\*deprivation + female sex + education + body mass index + body mass index<sup>2</sup> normalised + smoking + depression + alcohol consumption + physical activity + hypertension + diabetes + solid tumour + (1|participant). Quadratic terms normalised by variable<sup>2</sup> / 1000. Interaction for surgeries\*other medical admissions included in reaction time and fluid intelligence fully adjusted models. Linear smoothing uses the formula,  $y \sim x + I(x^2)$ .

## References

1. Miller, et al., *Nat Neurosci* **2016**; 19; 11. 1523-36.
2. Smith, et al., UK Biobank Brain Imaging Documentation. UK Biobank. Oxford, Oxfordshire, United Kingdom, **2020**.
3. Patenaude, et al., *NeuroImage (Orlando, Fla)* **2011**; 56; 3. 907-22.
4. Zlokovic, *Nat Rev Neurosci* **2011**; 12; 12. 723-38.
5. Heinzinger, et al., *Alzheimer's research & therapy* **2023**; 15; 1. 50.
6. Leandrou, et al., *IEEE Rev Biomed Eng* **2018**; 11; 97-111.
7. Ferreira, et al., *Neurology* **2020**; 94; 10. 436-48.
8. Dale, et al., *NeuroImage (Orlando, Fla)* **1999**; 9; 2. 179-94.
9. Desikan, et al., *Neuroimage* **2006**; 31; 3. 968-80.
10. Klein; Tourville, *Front Neurosci* **2012**; 6; 171.
11. Krause, et al., *BMJ* **2019**; 366; l4466.
12. Livingston, et al., *Lancet* **2020**; 396; 10248. 413-46.
13. Townsend, et al., *Health and deprivation . inequality and the North*. Croom Helm. London ;, **1988**.
14. Daviet, et al., *Nat Commun* **2022**; 13; 1. 1175.

**Index to main manuscript**

|                                                                                                                                                                 |    |                                                                                                                                                            |    |
|-----------------------------------------------------------------------------------------------------------------------------------------------------------------|----|------------------------------------------------------------------------------------------------------------------------------------------------------------|----|
| Figure 2. Plots of actual and predicted values for fully adjusted models: association of cumulative surgeries at a specific age for all cognitive outcomes..... | 53 | Supplementary Table 18. Fully adjusted models. primary brain imaging outcomes ~ high complexity cumulative surgeries.....                                  | 38 |
| Supplementary Table 01. UK Biobank field references.....                                                                                                        | 2  | Supplementary Table 19. Models. secondary (DKT) brain imaging outcomes ~ cumulative surgeries.....                                                         | 40 |
| Supplementary Table 02. Model selection.....                                                                                                                    | 10 | Supplementary Table 20. Foundation models - reaction time stroke/no stroke datasets.....                                                                   | 41 |
| Supplementary Table 03. Expanded demographics table by cognitive outcomes.....                                                                                  | 11 | Supplementary Table 21. Fully adjusted models - reaction time with stroke/no stroke datasets.....                                                          | 42 |
| Supplementary Table 04. 1:0 participants returning at 1:2.....                                                                                                  | 15 | Supplementary Table 22. Foundation models - fluid intelligence and stroke/no stroke datasets.....                                                          | 45 |
| Supplementary Table 05. Foundation models cognitive outcomes ~ cumulative surgeries.....                                                                        | 17 | Supplementary Table 23. Fully adjusted models - fluid intelligence with stroke/no stroke datasets.....                                                     | 46 |
| Supplementary Table 06. Foundation models cognitive outcomes ~ surgery factored.....                                                                            | 18 | Supplementary Table 25. Foundation models. Reaction time 1SD/2SD cognitive decline ~ cumulative surgeries 1:2 – 1:0 & 1:3-1:2.....                         | 51 |
| Supplementary Table 07. Foundation models cognitive outcome ~ high complexity surgeries.....                                                                    | 19 | Supplementary Table 26. Foundation models. Reaction time 1SD/2SD cognitive decline ~ cumulative surgeries as a factor 1:2 – 1:0 & 1:3-1:2.....             | 51 |
| Supplementary Table 08. Fully adjusted models cognitive outcome ~ cumulative surgeries.....                                                                     | 20 | Supplementary Table 27. Foundation models. Reaction time 1SD/2SD cognitive decline ~ high complexity surgeries 1:2 – 1:0 & 1:3-1:2.....                    | 51 |
| Supplementary Table 13. Foundation models brain imaging ~ cumulative surgeries.....                                                                             | 31 | Supplementary Table 28. Foundation models. Reaction time 1SD/2SD cognitive decline ~ surgical admissions (binary) 1:2 – 1:0 & 1:3-1:2.....                 | 52 |
| Supplementary Table 16. Fully adjusted models. primary brain imaging outcomes ~ cumulative surgeries.....                                                       | 34 | Supplementary Table 29. Foundation models. Reaction time 1SD/2SD cognitive decline ~ high complexity surgical admissions (binary) 1:2 – 1:0 & 1:3-1:2..... | 52 |
| Supplementary Table 17. Fully adjusted models. primary brain imaging outcomes ~ surgery factored.....                                                           | 36 |                                                                                                                                                            |    |
